# Supplementary material for: Understanding the investigators: a qualitative study investigating the barriers and enablers to the implementation of local investigator-initiated clinical trials in Ethiopia
Source: PubMed Central journal article supplement — BMJ Open. 2013 Nov 27;3(11):e003616. doi: 10.1136/bmjopen-2013-003616 (PMC3845054; doi:10.1136/bmjopen-2013-003616), 2013-11-27
Supplement: bmjopen-2013-003616.draft_revisions.pdf [file bmjopen-2013-003616.draft_revisions.pdf]

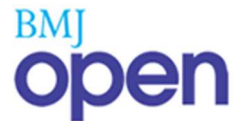

**Understanding the investigators: a qualitative study  
investigating the barriers and enablers to the  
implementation of local investigator-initiated clinical trials  
in Ethiopia**

|                                 |                                                                                                                                                                                                                                                                                                                                                                                                                                                                                                                                                                                                                                                                                                                                                                                           |
|---------------------------------|-------------------------------------------------------------------------------------------------------------------------------------------------------------------------------------------------------------------------------------------------------------------------------------------------------------------------------------------------------------------------------------------------------------------------------------------------------------------------------------------------------------------------------------------------------------------------------------------------------------------------------------------------------------------------------------------------------------------------------------------------------------------------------------------|
| Journal:                        | <i>BMJ Open</i>                                                                                                                                                                                                                                                                                                                                                                                                                                                                                                                                                                                                                                                                                                                                                                           |
| Manuscript ID:                  | bmjopen-2013-003616                                                                                                                                                                                                                                                                                                                                                                                                                                                                                                                                                                                                                                                                                                                                                                       |
| Article Type:                   | Research                                                                                                                                                                                                                                                                                                                                                                                                                                                                                                                                                                                                                                                                                                                                                                                  |
| Date Submitted by the Author:   | 18-Jul-2013                                                                                                                                                                                                                                                                                                                                                                                                                                                                                                                                                                                                                                                                                                                                                                               |
| Complete List of Authors:       | Franzen, Samuel; University of Oxford, The Global Health Network, Centre for Clinical Vaccinology & Tropical Medicine<br>Chandler, Clare; London School of Hygiene & Tropical Medicine, Global Health and Development<br>Enquselassie, Fikre; Addis Ababa University, Department of Preventive Medicine, College of Health Sciences<br>Siribaddana, Sisira; Rajarata University of Sri Lanka, Department of Medicine, Faculty of Medicine & Allied Sciences<br>Atashili, Julius; University of Buea, Department of Public Health and Hygiene, Faculty of Health Sciences<br>Angus, Brian; University of Oxford, Centre for Clinical Vaccinology & Tropical Medicine<br>Lang, Trudie; University of Oxford, The Global Health Network, Centre for Clinical Vaccinology & Tropical Medicine |
| <b>Primary Subject Heading</b>: | Global health                                                                                                                                                                                                                                                                                                                                                                                                                                                                                                                                                                                                                                                                                                                                                                             |
| Secondary Subject Heading:      | Research methods, Qualitative research, Infectious diseases, Medical education and training, Health policy                                                                                                                                                                                                                                                                                                                                                                                                                                                                                                                                                                                                                                                                                |
| Keywords:                       | Clinical Trial, Capacity Strengthening, Developing Country, Research Personnel, Research Organisation and Administration, TROPICAL MEDICINE                                                                                                                                                                                                                                                                                                                                                                                                                                                                                                                                                                                                                                               |
|                                 |                                                                                                                                                                                                                                                                                                                                                                                                                                                                                                                                                                                                                                                                                                                                                                                           |

SCHOLARONE™  
Manuscripts

**Article type:**

Research Article

**Article title:**

Understanding the investigators: a qualitative study investigating the barriers and enablers to the implementation of local investigator-initiated clinical trials in Ethiopia

**Short title:**

Barriers and enablers to local investigator-initiated clinical trials in Ethiopia

**Authors:**

Samuel R P Franzen<sup>1</sup>, Clare Chandler<sup>2</sup>, Fikre Enquesslassie<sup>3</sup>, Sisira Siribaddana<sup>4</sup>, Julius Atashili<sup>5</sup>, Brian Angus<sup>1</sup>, Trudie Lang<sup>1</sup>

**Corresponding Author:**

Samuel R P Franzen, The Global Health Network, Centre for Clinical Vaccinology & Tropical Medicine, University of Oxford, John Warin Ward, Churchill Hospital, Old Road, Headington, Oxford, Oxfordshire, OX3 7LJ, Email: [sam@globalhealthtrials.org](mailto:sam@globalhealthtrials.org), Telephone: +44(0)1865857570, Fax: +44(0)1865857407

**Author Institutions:**

<sup>1</sup>The Global Health Network, Centre for Clinical Vaccinology & Tropical Medicine, University of Oxford, Oxford, UK.

<sup>2</sup> Department of Global Health and Development, London School of Hygiene & Tropical Medicine, London W, UK.

<sup>3</sup> Department of Preventive Medicine, College of Health Sciences, Addis Ababa University, Ethiopia

<sup>4</sup> Department of Medicine, Faculty of Medicine & Allied Sciences, Rajarata University of Sri Lanka, Saliyapura, Sri Lanka

<sup>5</sup> Department of Public Health and Hygiene, Faculty of Health Sciences, University of Buea, Buea, Cameroon

**Key Words/phrases – up to 5 (MeSH Terms)**

Clinical Trial [Topic]

Capacity Strengthening

Developing Country

Research Personnel

Research/ organization & administration

**Word Count:**

4350 (excluding title page, abstract, summary, references, legends, figures and tables)

## ABSTRACT

### Objectives

Clinical trials provide “gold standard” evidence for policy, but insufficient locally-relevant trials are conducted in Low- and Middle-Income countries. Local investigator-initiated trials could generate highly relevant data for national governments, but information is lacking on how to facilitate them. We aimed to identify barriers and enablers to investigator-initiated trials in Ethiopia to inform and direct capacity strengthening initiatives.

### Design

Exploratory, qualitative study comprising of in-depth interviews (n=7) and focus group discussions (n=3).

### Setting

Fieldwork took place in Ethiopia during March 2011.

### Participants

Local health researchers with previous experiences of clinical trials or stakeholders with an interest in trials were recruited through snowball sampling (n=20).

### Outcome measures

Detailed discussion notes were analysed using thematic coding analysis and key themes were identified.

### Results

All participants perceived investigator-initiated trials as important for generating local evidence. System and organisational barriers included: Limited resource allocation, weak regulatory and administrative systems, few learning opportunities, limited human and material capacity, and poor incentives for conducting research. Operational hurdles were symptomatic of these barriers. Lack of awareness, confidence and motivation to undertake trials were important individual barriers. Training, knowledge sharing and experience exchange were key enablers to trial conduct and collaboration was unanimously regarded as important for improving capacity.

### Conclusions

Barriers to trial conduct were found at individual, operational, organisational and system levels. These findings indicate that to increase locally-led trial conduct in Ethiopia, system wide changes are needed to create a more receptive and enabling research environment. Crucially, the creation of research networks between potential trial groups could provide much needed practical collaborative support through sharing of burdens, knowledge and resources. These findings could have important implications for capacity strengthening initiatives but further research is needed before the results can be generalised more widely.

## ARTICLE SUMMARY

### Article focus

- Investigator-initiated trials could provide much needed locally relevant evidence for Low-and Middle-Income Countries, but little is known about why so few are conducted
- The objective of this paper is to report the barriers and enablers to locally-led trial conduct in Ethiopia from the perspective of local-investigators
- We summarise key factors influencing investigator-initiated trial conduct and make suggestions for directing capacity strengthening efforts

### Key messages

- Clinical trial implementation is influenced by factors at all levels of the research system
- Clinical trials are rarely attempted by local researchers because of unsupportive research environments
- There is a need to build a receptive research environment that creates awareness of trials, provides investigators' with the knowledge, confidence and incentives to conduct them and removes operational barriers.

### Strengths and limitations

- To our knowledge this is the first empirical study exploring these issues in Low-and Middle-Income Countries
- Gives a compelling voice to local investigators who are often unheard in this Northern dominated discourse
- As a formative study, the sample size was small, the sampling purposive and the findings may be context specific

## INTRODUCTION

1 Many development organisations argue that clinical research in low and middle income countries (LMIC) is essential  
2 for improving public health and development.[1] In LMICs clinical research capacity remains insufficient. This  
3 perpetuates the “10/90 gap”, where only 10% of global health research expenditure is allocated to diseases that  
4 affect 90% of the world’s population. This leads to a lack of evidence for the world’s most burdensome diseases.[2]  
5 Evidence from Western nations is often not relevant to LMICs, [3] and its adoption into clinical practice can be slow  
6 and treated with caution.[1 4] Increasing the number of clinical trials conducted in LMICs would help generate local  
7 evidence,[4] which may be more likely to rapidly influence policy and practice.[5]  
8

9  
10  
11 Most clinical trials conducted in LMICs are run by foreign research organisations with their own agendas. Recently  
12 there have been calls from within LMICs for more ownership over priority setting,[6] greater engagement with local  
13 research communities,[7] and research conducted in line with national health strategies.[8] Pragmatic, locally-  
14 initiated disease management studies could significantly improve public health.[4] Despite being simple and cost  
15 effective, they are often ignored by international trial groups,[9] and are rarely independently undertaken in LMICs.  
16 Meanwhile, there is increasing expectation that LMICs should take more responsibility for their research  
17 activities.[10] Increasing the number of local investigator-initiated trials (IITs) could be an answer to these issues.  
18 Several advantages of IITs over foreign-initiated trials (FITs) have been put forward (Table 1).  
19  
20  
21

22  
23 **Table 1 - Advantages of investigator-initiated trials over foreign-initiated trials**

- 24 • More applicable to local populations due to building on local healthcare knowledge [11]
- 25 • More demand-led and responsive to a country’s needs because they are driven by a national agenda [9]
- 26 • Often simple studies that address important topics such as disease management [4 9]
- 27 • Involve local staff at all levels and stages of trial conduct,[12] so there is more opportunity for “learning by  
28 doing” and skill development [13]  
29  
30  
31  
32

33  
34 The establishment of Africa-owned research centres capable of running their own clinical trials has been identified as  
35 an international priority,[14] and there are ever increasing numbers of clinical trials being conducted in LMICs.[4]  
36 However, few of these trials are locally initiated,[15] and globally, trials are becoming harder to implement.[4] Many  
37 research bodies have increased efforts to support IITs in Europe,[15 16] but within LMICs capacity building mostly  
38 focuses on developing sites to run international trials. Capacity building to support independent locally-led trials is  
39 likely to require a different approach. However, little is known about the best way to develop capacity and facilitate  
40 their conduct. This formative study investigates the issues facing local trial investigators in Ethiopia, a U.K.  
41 Department for International Development (DFID) priority funded country for research development,[17] and was  
42 designed to begin addressing this knowledge gap by determining the barriers and enablers to trial conduct.  
43  
44  
45  
46  
47  
48  
49  
50  
51  
52  
53  
54  
55  
56  
57  
58  
59  
60

## METHODS

1 We conducted a qualitative study using in-depth interviews (IDIs) and focus group discussions (FGDs). Research  
2 exercises took place in Addis Ababa and Gondar, Ethiopia, in March and April 2011. Ethiopia was selected to  
3 represent a country in Sub-Saharan Africa that conducts a modest number of clinical trials while having sufficient  
4 trial experience to contribute to this study. Ethiopia had 39 trials registered at the time of fieldwork; a breakdown of  
5 these by intervention and sponsor is shown in figure 1. The majority of drug trials investigated the use of approved  
6 drugs to optimise treatment.  
7  
8

9  
10 This study seeks to understand the perspectives and experiences of current and potential trial investigators and  
11 staff. Due to the paucity of previous work on this topic, we did not prospectively adopt a specific theoretical  
12 framework. However, research questions were influenced by the fields of organisational change and development.  
13 FGDs and IDIs were semi-structured and explored the following themes: the clinical research environment in  
14 Ethiopia, barriers and enablers to trial conduct, access to appropriate skills and knowledge, current support for  
15 clinical trials and recommendations for change. Questions were tailored to participants' experience and emerging  
16 themes.  
17  
18

19  
20 Participants were identified first through trial registration searches and subsequently by snowball sampling from  
21 these individuals. Health researchers with previous experiences of clinical trials or stakeholders with an interest in  
22 trials were selected. Of all the participants approached, none refused to take part. Interviews and discussions were  
23 conducted in English, and explored key points until no new information emerged. In preliminary meetings,  
24 participants said they would speak more openly if discussions were not audio recorded. Detailed notes were taken  
25 with quotes noted as near verbatim as possible, detailing identification numbers.  
26  
27

28 This study was approved by the University of Oxford Tropical Research Ethics Committee. Verbal informed consent  
29 was obtained from all participants and review of discussion contributions and written confirmatory permission was  
30 obtained for all participants who could be contacted (15/20). No quotes are included from those who could not be  
31 contacted.  
32

33 Notes were analysed by thematic coding analysis using Nvivo qualitative data analysis package (QSR International Pty  
34 Ltd. Version 9, 2011) to help organise the data. Data were coded inductively according to its semantic content.[18]  
35 Using relationship and modelling functions, a mechanistic model of factors influential to clinical trial conduct was  
36 developed through piecing together complementary segments of data contributed from different participants.  
37 Coding was completed by SF with consultation and agreement from other authors (TL, CC, and BA). Findings were  
38 reviewed and commented on by all authors.  
39  
40  
41  
42  
43  
44  
45  
46  
47  
48  
49  
50  
51  
52  
53  
54  
55  
56  
57  
58  
59  
60

## RESULTS

### Study population

We conducted 2 FGDs and 6 interviews in Addis Ababa and 1 FGD and 1 interview in Gondar. A total of 20 researchers participated; 7 were based at a research centre, 1 at an NGO, 8 at a hospital and 4 at a university. Figure 2 shows recruitment by current research related job role and then by current and previous experience domains.

### A role for investigator-initiated trials

All participants reported that too few clinical trials are conducted in Ethiopia, and regretted the lack of local evidence to guide policy. Most treatment strategies were based on international guidelines, which many participants thought could be inappropriate. Participants proposed that locally-led trials would be useful for filling this evidence gap and that the conduct of simple design studies was independently achievable. Many researchers would like to lead their own studies and had important questions, but were often unsure how to go about doing this, as described by this senior clinician:

*“We don’t have the evidence to change local practices but we definitely know some written guidelines don’t work. There are a number of unanswered questions for trials but we don’t know how to do them. We need clinical research [in disease areas] that has a different effect in Ethiopia, for example HIV and TB. These diseases are similar as to other places but we have had little success [controlling them] here. So why? Where are the mistakes? These sorts of investigations are easy, they would support awareness and fill gaps.”* FGD - 3 PPT – 1

Compared to foreign-led studies, local trials were perceived to be more likely to address evidence gaps, be more useful for developing treatment guidelines, and more sensitive to community issues. One junior clinician described this through his experiences:

*“Investigator-initiated trials increase evidence, particularly locally relevant evidence. For instance the Leishmania strain in Gondar seems to be a bit different to the other strains because the drug treatment is working better in the other areas. This will prevent mistakes in clinical care”.* INT - 6 PPT - 1

### Human and Material capacity

While a general lack of materials, infrastructure and laboratory facilities were thought to reduce the number and scope of trials, most participants felt that human resources were the critical factor. Respondents stated that there were too few investigators with the technical expertise to initiate a trial. There was also a shortage of skilled research staff, with one investigator stating that if one or two staff left, their trial could not continue (FGD - 3 PPT - 1- senior clinician and trial investigator). This lack of expertise and research skills was blamed on minimal research focus in clinical education, few opportunities to gain experience and few local experts who could share their knowledge.

*“From my undergraduate experience, I was trained to be a clinician and not a researcher; this is from a curriculum point of view. Few clinicians use clinical trials as they are involved in primary care and not research. They have no spare time to think about research”..... “We need the opportunity to have a simple role and experience to get more people to do more trials. As more people get involved in simple research and trials, more research will be done”.* INT - 6 PPT – 1, Trial clinician

Individuals skilled in trials were often too busy with regular duties to be able to conduct research. Most senior trial staff were clinicians and while release from routine duties could be negotiated, they complained that healthcare tasks still had to be prioritised. Academics had allocated time for research but this was regularly cited as insufficient. The limited manpower allocation to research and few opportunities to gain experience resulted in a negative feedback loop, as explained by this trial clinician:

1  
2  
3  
4  
5  
6  
7  
8  
9  
10  
11  
12  
13  
14  
15  
16  
17  
18  
19  
20  
21  
22  
23  
24  
25  
26  
27  
28  
29  
30  
31  
32  
33  
34  
35  
36  
37  
38  
39  
40  
41  
42  
43  
44  
45  
46  
47  
48  
49  
50  
51  
52  
53  
54  
55  
56  
57  
58  
59  
60

*"The scope of activities is narrowed by the time and economic constraints and the fact few individuals can be involved. Because the scope is narrowed this results in a cycle of fewer people being involved, which in turn results in less motivation, fewer trials and less exposure and realising they way of thinking and less achievement. Then less people are involved and there are fewer trials". INT - 6 PPT - 1*

## Regulatory and other administrative bottlenecks

Respondents reported that complex and strict government regulations made it very difficult to investigate novel interventions and recruit vulnerable populations. Regulatory and ethical review times also introduced delays and it was not uncommon for grants to expire before all approvals were in place. A trial Principal Investigator (PI) explains this further:

*"Regulatory authorities have no clear guidelines so it is problematic getting approvals. They are also not experienced enough and so are overcautious and they cannot decide on interpretations". FGD -1 PPT -1, Trial PI*

Ethics committee members admitted that limited resources, knowledge gaps and membership shortages slowed review times, but also pointed out that poor quality applications meant re-submission was regularly required. They emphasised that clarification of regulations and developing review capacity were essential to facilitate trial implementation and that more training in research ethics was needed. One participant explained that The Ethiopian Bioethics Initiative is already working towards this.

University and government administration systems were unanimously regarded as overly-complicated and blamed for many operational delays. To cope with this, many investigators said they required an administrative assistant but could not afford one.

*"The university finance department is a bottleneck. You really need an admin assistant to help with this. Most doctors do not want to go through the pain of organising and administering all this. Also if you do not report your annual budget on time you may be penalised and have your salary suspended. The clinical trial financing really increases the amount of work you must do for your budget reporting. If I got a good grant I would hire an admin or research student to manage these issues." INT - 3 PPT -1, Clinician*

## Operational hurdles

During one in-depth interview, a process mapping exercise was used as a template for discussion; the participant draws a detailed flow diagram of the steps and tasks involved in conducting their clinical trial, noting problems, successes, and changes to be made in hindsight. Table 2 describes the experience of one PI, providing an example case of operational hurdles and the importance of advanced planning.

**Table 2 - Experience of a local PI on a foreign NGO-led non-commercial study**

Registering the clinical trial caused considerable delays because task allocation was overlooked. Ethical approval for this relatively complex study took 12 months due to a cycle of resubmission. Ordering to delivery of supplies routinely took 3-6 months. Data entry and analysis were delayed because the data management system had not been considered early enough and training could only be obtained in Europe. Some laboratory tests were outsourced to a local private laboratory because staff lacked the training and equipment, while other assays were complicated by lack of normal ranges for local populations. In hindsight the PI would have taken more care with planning and preparation and made roles and responsibilities clear from the outset.



The majority of serious operational difficulties occurred during the start-up stage of trial conduct. Once intervention delivery began, there were few major challenges. Participants attributed most operational hurdles to wider issues. The main operational hurdles and their causes are summarised in Table 3. Keeping trial designs simple, only investigating approved interventions, and avoiding vulnerable populations were strategies used to reduce operational difficulty.

| Operational Hurdles                                             | Reported causes                                                                                                                                                                                                                                                            |
|-----------------------------------------------------------------|----------------------------------------------------------------------------------------------------------------------------------------------------------------------------------------------------------------------------------------------------------------------------|
| 1. Difficulty writing proposals and gaining funding             | <ul style="list-style-type: none"> <li>• Little local funding, competitive international funding</li> <li>• Technical ability and confidence lacking</li> <li>• Unsure of funding process; investigators don't complete application</li> <li>• Lack of training</li> </ul> |
| 2. Slow regulatory and ethical approvals                        | <ul style="list-style-type: none"> <li>• Complex and unclear guidelines</li> <li>• Limited ethical review capacity</li> <li>• Poor quality submissions</li> </ul>                                                                                                          |
| 3. Problems with trial management                               | <ul style="list-style-type: none"> <li>• Lack of experience and poor planning</li> </ul>                                                                                                                                                                                   |
| 4. Burdensome administration and difficulty purchasing supplies | <ul style="list-style-type: none"> <li>• Complex and slow systems</li> <li>• No administrative support</li> </ul>                                                                                                                                                          |
| 5. Problems with setting up and running laboratory tests        | <ul style="list-style-type: none"> <li>• Limited funds and facilities</li> <li>• Difficulty purchasing supplies</li> <li>• Lack knowledge in technologically advanced procedures</li> </ul>                                                                                |

Table 3: Participant reported operational hurdles and their causes

### Initiating an idea: Awareness, Confidence and Motivation

Limited awareness of trial research was commonly reported as a reason for trials not being attempted. This was because potential investigators were not exposed to the methodology or had not considered doing them, as explained by this PI:

*"People do not have the vision that clinical trials will improve patient care because they do not see it in their daily lives. Clinical trials are important but essentially people do not see them enough to think of them".* INT - 4 PPT -1, Senior Clinician

This was attributed to omissions in medical student curricula, limited access to literature, little trial research training and few trial opportunities. If individuals had considered conducting a trial, many said they were not confident to initiate one themselves because they lacked the knowledge and skills. Even investigators who had considerable experience on foreign-led studies said they did not feel ready to lead their own. The expectation of operational difficulties and few examples of role models successfully conducting trials created a "phobia" of trial research, with people believing them to be almost impossible. This "phobia" and lack of awareness was seen as a key barrier to trial conduct, as explained by this junior trial investigator:

*"We need to develop and support a research culture by capacity building to develop skills and resources, not big capacity building like an operating room, but small scale like small grants for beginner researchers to do research and get practice - this would take away the phobia of writing proposals and publications. When the phobia has gone there will be floods of research. We need to open our eyes and see what can be done. For instance people don't know how to write a proposal. In people's academic studies this sort of stuff is not given priority. Even small research will be an eye opener and the phobia will be gone."* FGD - 3 PPT - 2, Clinician and junior investigator

Even when potential investigators felt ready to conduct a trial, many participants said there was little motivation for undertaking them. Participants were encouraged by altruistic incentives such as community health improvement and organisational development but personal career incentives were weak. A lack of research career options discouraged students from entering into research after studies or caused them to migrate for work, as this junior academic explained:

1  
2  
3  
4  
5  
6  
7  
8  
9  
10  
11  
12  
13  
14  
15  
16  
17  
18  
19  
20  
21  
22  
23  
24  
25  
26  
27  
28  
29  
30  
31  
32  
33  
34  
35  
36  
37  
38  
39  
40  
41  
42  
43  
44  
45  
46  
47  
48  
49  
50  
51  
52  
53  
54  
55  
56  
57  
58  
59  
60

*"We need to make sure people get jobs and an established career in research to get them to stay in their home country or to come back to their home country after training or education abroad."* INT - 2 PPT -1

Researchers also reported little recognition for research and that promotion could be achieved without doing research. Additionally, strong salary and workload disincentives were cited, as summarised by this IDI participant:

*"The problem is that this [clinical trial research] will take lots of your time and while it is possible to reduce your clinic hours, this means you would lose money. The country does not pay you even though it is for public benefit. There is no incentive, in short".* INT - 4 PPT -1, Senior clinician

### The key enablers: Training, Knowledge Sharing and Experience Exchange

Equal to their value for building technical competence, many participants saw trial training, knowledge sharing and experience exchange as key enablers for increasing awareness, confidence and motivation. Training was viewed as important for awareness and encouraging staff to consider their workplace challenges in a more enquiring light. Knowledge sharing boosted researcher's confidence that trials were achievable and experience exchange was important for raising professional standards and dispelling what one respondent termed "pseudo-confidence" (INT - 4 PPT -1 - Clinician and trial PI); meaning to continue working in a sub-optimum way because knowledge of more rigorous methods was lacking. Many participants emphasised that all these enablers would be more effective if grounded in local examples and context, such as knowledge sharing with individuals whose settings were similar to the researcher's own. Learning activities were also highly motivational because they were prized for both personal and professional development. Given the scarcity of trial opportunities in Ethiopia, some participants suggested that national or international experience exchange programmes would be useful. One FGD participant explained her trial team's experiences:

*"What we really want is for a south-south collaboration like Kenya or Uganda to do exchange placements for our junior staff. This would show people in resource-limited settings it is possible to do trials and would motivate people much more than website or e-learning.....She [referring to research nurse] has been to Kenya and Switzerland and this has helped her to see how clinical trials are done and what is good and bad and see the possibilities."* FGD - 3 PPT – 1, Senior clinician and trial investigator

### The importance of collaboration

While some respondents had negative experiences with foreign led-studies or said they would prefer to be less dependent on foreign groups, most participants were very positive about international collaboration, assuming intellectual independence could be protected. Technical expertise and infrastructure strengthening provided through collaborations were consistently proposed as a solution to the limited human and material resources. Particularly, collaborative grant applications had been very helpful for securing funding by increasing the quality and credibility of applications. Local and international collaboration was also seen as a key way to access and promote training, knowledge sharing and experience exchange. This senior academic summarises the general opinion:

*"The priority is addressing local concerns like field-based optimisation. Weight should be given to locally initiated ideas. However, you should then ask for international assistance and collaboration. The investigator-initiated trial is all about the idea and not about the operation. You do not have to re-invent the wheel; you should make the most of global knowledge and skills. Everyone should chip in with their appropriate competence and expertise. This way the work will be faster and more efficient and local researchers will have access to technologies".* INT - 1 PPT -1

However, junior participants said they lacked the contacts and knowledge to develop partnerships and even established researchers often felt intellectually isolated from the East African and wider research community. This was believed to hamper innovation and cause repetition of ideas.

## DISCUSSION

This study supports the call for more local evidence generation in LMICs, and provides evidence that investigator-initiated trials would generate highly useful and applicable data. The challenge is implementing and successfully conducting a locally-led study. We have identified barriers to the implementation of investigator-initiated trials in Ethiopia at all levels of the research system. Exploring through the perspective of local investigators has given a critical understanding of how these issues influence their ability to initiate trials. We have highlighted the importance of training, knowledge sharing, experience exchange and collaboration, for breaking down barriers in somewhat unexpected ways and now consider, in light of this, how locally-led trials can be better supported.

### The research system

Health research systems represent the coordinated activities of all stakeholders to produce health research and may operate at local, national, regional or global levels. The four main functions of health research systems are: stewardship, financing, resources and producing and using research.[19] In Ethiopia, barriers and enablers to trial conduct have been identified at all levels of the national research system; system, organisational and individual. In addition to impacting on trial operations, these factors may cause feedback loops that perpetuate problems. The main influential factors identified in this study have been summarised into a mechanistic model (Figure 3).

System level barriers impact on all levels through dysfunctional regulatory and administrative systems, insufficient resource allocation and limited ethical review capacity. Suffering from limited resources, the organisational level has limited learning opportunities that negatively impact on human resources and there are insufficient material resources. These deficiencies combined with adverse regulatory and administrative systems make operating clinical trials difficult. The combined effects of insufficient resources, limited learning opportunities and difficult operations result in a disabling research environment at an individual level. This reduces awareness of trials, limits competence and confidence, and reduces motivation to undertake them. Few trials are attempted and this forms a negative feedback loop by reducing opportunities for experience.

These results demonstrate the importance of taking a system-wide view to research development. Operational problems are embedded in wider issues, and while certain strategies may help investigators cope with problems, their resolution is dependent on strengthening capacity at all levels of the system.

### Building a receptive research environment

Although capacity to conduct trials was limited, most researchers agreed that simple design studies could be done. However, local investigators have attempted few trials. A key problem was the disabling research environment at the individual level. Clinical trials are a relatively new phenomenon and are not yet embedded in the Ethiopian research culture. Therefore their implementation can be viewed as a change within this culture. The ADKAR model for organisational change management, suggests that for a change to happen at an individual level, Awareness, Desire, Knowledge, Ability and Reinforcement must be present.[20] Trial awareness was limited and investigators did not have the vision that trials would improve patient care. Although most participants had the desire to lead a trial, they reported a general lack of knowledge and competence. For those that had the knowledge, many still felt unable to lead a trial, or were unwilling because of minimal motivational reinforcement.

This study and others,[21 22] suggest that increased learning opportunities and rewarding career paths are required to increase human resource capacity and retain skilled personnel. Increasing research components in taught courses, and providing training and small research grants for young researchers would increase awareness, desire and knowledge to conduct research. In Ethiopia, clinical academic staff have low salaries and are paid less than public sector physicians.[23] This, combined with limited funding, high teaching burdens, low quality facilities and frustrations with bureaucratic and operational hurdles found in this and another study,[23] all serve as strong disincentives to research. Providing protected and salaried time for research and recognising research within careers would help motivate investigators to undertake trials through positive reinforcement.

1 Several participants expressed their inability to lead their own trial as a lack of confidence, or phobia, and  
2 investigators who had worked on foreign-led studies still did not feel ready to lead their own trial. Local funding and  
3 material capacity constraints were often cited as the cause, but many researchers had not applied for international  
4 funding. Expectation of insurmountable barriers and lack of successful role models certainly reduce confidence.  
5 However, it is possible that the intellectual isolation identified in this and another study,[23] and lack of a supportive  
6 research environment, could reduce initiative. It is also possible that working within a nation that historically  
7 discouraged personal autonomy could reduce the ability of individuals to act as agents in change.  
8

## 9 **Networking**

10 Collaboration was key to the provision of training, knowledge sharing and experience exchange, and accessing  
11 technical expertise and infrastructure strengthening. Better networking within and between local and international  
12 research organisations could facilitate the provision of these enablers and decrease intellectual isolation.  
13

14 Successful local sites are often busy, so exchange placements could be organised to allow more individuals to get  
15 involved. This could potentially increase trial staff numbers and reduce the impact of task shifting on clinic work. This  
16 may then reverse the negative feedback loop between insufficient human resources and few trials. Local research  
17 networks could support sustainable training models if a few experts become trainer of trainers and mentorship  
18 programmes linking experts to junior staff could provide inspirational support and guidance for isolated individuals.  
19 The need for administrative support in LMICs is common as many universities lack established research services.[22  
20 24] Cooperation between departments to form research clusters would make hiring an administrative assistant  
21 affordable and could help share the cost and burden of purchasing supplies.  
22

23 Creation of communities of practice could help to develop these relationships but proven strategies that foster their  
24 development are not clearly established.[25] Networking opportunities such as workshops would be useful, but  
25 firstly all stakeholders need to be identified and travel, time and cost can be barrier. Also, the informal nature of  
26 partnership formation in this study meant that less established researchers did not have the contacts or knowledge  
27 to find partners. One solution could be to develop a local and international online networking facility, detailing  
28 research interests, expertise, resources and current projects.  
29

## 30 **Prioritising research systems**

31 Capacity building attached to foreign-led studies typically focuses on training individuals in specific skills or providing  
32 one specific service or resource. While this may get a particular study done, it does not appear to provide the  
33 package necessary to allow local investigators to conduct their own research. This study demonstrates the diversity  
34 of factors influencing IIT implementation and shows that focusing on system wide improvements must be integral to  
35 any long-term research development plan for Ethiopia. For this to happen research must be prioritised, not just in  
36 terms of resource allocation but also the value placed on research. However, in a country with insufficient health  
37 workers to provide routine healthcare,[23] and many other competing priorities, this may be difficult. Despite this,  
38 such a value change could already be underway. Jimma University in South West Ethiopia has been applauded for  
39 pioneering new innovative teaching methods, valuing research within institutional culture and integrating it in career  
40 progress.[23 26]  
41

## 42 **Strengths and Limitations**

43 As a formative study, the sample size and range of stakeholder roles was necessarily small, and the findings may be  
44 specific to the locations or dependent on contextual factors such as governance style. However, the study sample  
45 accessed diverse experiences and used in-depth qualitative methods to uncover issues in a largely unexplored area,  
46 while giving a compelling voice to local investigators who are often unheard in this Northern dominated discourse.  
47 The findings also agree with much of the current literature. This includes the key factors for an enabling research  
48 environment as identified by The Health Research System Analysis Initiative of WHO/RPC,[19] and recommendations  
49 for increasing investigator-initiated trial conduct by The European Science Foundation.[27] Nevertheless it was  
50 important to confirm that local investigators in LMICs held similar views as espoused by the above reports. We plan  
51 to conduct further research on this topic in diverse settings, including a wider range of stakeholders.  
52

## CONCLUSION

1  
2  
3  
4  
5  
6  
7  
8  
9  
10  
11  
12  
13  
14  
15  
16  
17  
18  
19  
20  
21  
22  
23  
24  
25  
26  
27  
28  
29  
30  
31  
32  
33  
34  
35  
36  
37  
38  
39  
40  
41  
42  
43  
44  
45  
46  
47  
48  
49  
50  
51  
52  
53  
54  
55  
56  
57  
58  
59  
60

Developing research capacity to conduct investigator-initiated trials is multifaceted and likely to require a different strategy to traditional approaches that focus on individuals or capacity building for specific studies. Appreciation of the barriers and enablers at all levels must be central to development drives, such as the recent funding by DFID. While this study provides a preliminary step forward in this area, further work is needed to develop the thorough understanding required to successfully support these critical studies.

For peer review only

## FIGURE LEGENDS

1  
2  
3  
4 *Figure 1: Number of clinical trials in Ethiopia by intervention type and sponsor, as registered on the WHO*  
5 *International Clinical Trials Registry Platform in the same period as data collection (30/04/2011). The observational*  
6 *study was registered as a clinical trial but was a cohort study with a nested cross-sectional design.*  
7

8 *Figure 2: Recruitment matrix showing current research role and current and previous experience domains. Experience*  
9 *domains are not mutually exclusive and one participant can have multiple experience domains.*  
10

11 *Figure 3: Mechanistic model of the factors influencing clinical trial conduct in Ethiopia*  
12  
13

## EXCLUSIVE LICENCE STATEMENT, CONTRIBUTORS, ACKNOWLEDGMENTS, COMPETING INTERESTS, FUNDING, STUDY APPROVAL

### Exclusive licence statement

14  
15  
16  
17  
18  
19  
20  
21  
22 I Samuel Franzen the Corresponding Author of this article contained within the original manuscript which includes  
23 any diagrams & photographs, other illustrative material, video, film or any other material howsoever submitted by  
24 the Contributor(s) at any time and related to the Contribution (“the Contribution”) have the right to grant on behalf  
25 of all authors and do grant on behalf of all authors, a licence to the BMJ Publishing Group Ltd and its licensees, to  
26 permit this Contribution (if accepted) to be published in BMJ Open and any other BMJ Group products and to exploit  
27 all subsidiary rights, as set out in the licence at: ([http://group.bmj.com/products/journals/instructions-for-](http://group.bmj.com/products/journals/instructions-for-authors/BMJOpen_licence.pdf)  
28 [authors/BMJOpen\\_licence.pdf](http://group.bmj.com/products/journals/instructions-for-authors/BMJOpen_licence.pdf))  
29  
30  
31

### Contributor Statement

32  
33  
34 SF conceived, designed and implemented the study, analysed the data and drafted the manuscript with input and  
35 assistance from CC, BA and TL. FE, SS and JA collaborated on the interpretation of data and critically revised and  
36 reviewed the manuscript. All authors approved the final version of the manuscript.  
37  
38

### Acknowledgements

39  
40  
41 We would like to thank all the faculty, researchers and students who participated in the study in Ethiopia  
42

### Competing interests

43  
44  
45 All authors declare that they have no competing interests  
46  
47

### Funding statement

48  
49  
50 This work was supported by The Global Health Network, a Bill and Melinda Gates Foundation funded project (grant  
51 reference: OPP1053843), and in part by a Nuffield Department of Medicine Doctoral Prize Studentship. The funders  
52 had no role in study sponsorship.  
53

### Study approval

54  
55  
56 This study was approved by the University of Oxford Tropical Research Ethics Committee (OXTREC Reference 70-11)  
57  
58  
59  
60

## DATA SHARING

No additional data available.

## REFERENCES

1. Nuyens Y. No Development Without Research. Global Forum for Health Research, Geneva 2005
2. Davey S. The 10/90 Report on Health Research 2003-2004. In: Global Forum for Health Research, ed. Geneva, Switzerland: Global Forum for Health Research, 2004.
3. Garner P, Kale R, Dickson R, et al. Getting research findings into practice - Implementing research findings in developing countries. *BMJ* 1998;**317**(7157):531-35
4. Lang T, Siribaddana S. Clinical trials have gone global: is this a good thing? *PLoS Med* 2012;**9**(6):e1001228
5. Page J, Heller RF, Kinlay S, et al. Attitudes of developing world physicians to where medical research is performed and reported. *BMC Public Health* 2003;**3**:6
6. Jones N, M. B, Lyytikainen M. Research capacity strengthening in Africa: Trends, gaps and opportunities. In: Institute OD, ed. London, 2007.
7. Aksoy S. Solutions to neglected tropical diseases require vibrant local scientific communities. *PLoS Negl Trop Dis* 2010;**4**(3):e662
8. Dayrit MM, Poz MRD, Mercer H, et al. Towards evidence-informed policy-making in human resources for health: the state of research. Global Forum Update on Research for Health Volume 4. London: Pro-Books Publishing Ltd, 2007:160-62.
9. Devasenapathy N, Singh K, Prabhakaran D. Conduct of clinical trials in developing countries: a perspective. *Curr Opin. Cardiol.* 2009;**24**(4):295-300
10. Laabes EP, Desai R, Zawedde SM, et al. How much longer will Africa have to depend on western nations for support of its capacity-building efforts for biomedical research? *Trop Med Int Health* 2011;**16**(3):258-62
11. Costello A, Zumla A. Moving to research partnerships in developing countries. *BMJ* 2000;**321**(7264):827-29
12. Hoekman J, Frenken K, de Zeeuw D, et al. The geographical distribution of leadership in globalized clinical trials. *PLoS ONE* 2012;**7**(10):e45984
13. Lansang MA, Dennis R. Building capacity in health research in the developing world. *Bull World Health Organ* 2004;**82**(10):764-70

- 1  
2  
3  
4  
5  
6  
7  
8  
9  
10  
11  
12  
13  
14  
15  
16  
17  
18  
19  
20  
21  
22  
23  
24  
25  
26  
27  
28  
29  
30  
31  
32  
33  
34  
35  
36  
37  
38  
39  
40  
41  
42  
43  
44  
45  
46  
47  
48  
49  
50  
51  
52  
53  
54  
55  
56  
57  
58  
59  
60
14. Matsoso. P, Auton. M, Banoo. S, et al. How does the regulatory framework affect incentives for research and development? A proposal for a regulatory framework to improve regulatory capacity and introduce incentives for research and development in areas of public health importance. In: Commission on intellectual property rights innovation and public health, ed. Geneva, 2005.
  15. Shafiq N, Pandhi P, Malhotra S. Investigator-initiated pragmatic trials in developing countries--much needed but much ignored. *Br J Clin Pharmacol* 2009;**67**(1):141-2
  16. Tyndall A. Why do we need noncommercial, investigator-initiated clinical trials? *Nat Clin Pract Rheum* 2008;**4**(7):354-55
  17. The Royal Society. Royal Society-DFID Africa Capacity Building Initiative. Secondary Royal Society-DFID Africa Capacity Building Initiative 2013. <http://royalsociety.org/grants/schemes/africa-capacity-building/>.
  18. Braun V, Clarke V. Using thematic analysis in psychology. *Qual Res in Psychol* 2006;**3**(2):34
  19. World Health Organisation. World report on knowledge for better health: strengthening health systems. Geneva: World Health Organisation, 2004.
  20. Hiatt J. *ADKAR: A Model for Change in Business, Government and the Community*. Loveland: Learning Centre Publications, 2006.
  21. Whitworth J, Sewankambo NK, Snewin VA. Improving implementation: building research capacity in maternal, neonatal, and child health in Africa. *PLoS Med* 2010;**7**(7):e1000299
  22. Mullan F, Frehywot S, Omaswa F, et al. Medical schools in sub-Saharan Africa. *Lancet* 2011;**377**(9771):1113-21
  23. Chen C, Greysen R, Mipando M, et al. SAMSS Site Visit Report: Faculty of Health Sciences, School of Medicine, Jimma University, Ethiopia: SAMMS 2009. <http://www.samss.org/samss.upload/wysiwyg/Full%20Site%20Visit%20Reports/Jimma%20-%20Ethiopia.pdf>
  24. Mbuagbaw L, Thabane L, Ongolo-Zogo P, et al. The challenges and opportunities of conducting a clinical trial in a low resource setting: the case of the Cameroon mobile phone SMS (CAMPS) trial, an investigator initiated trial. *Trials* 2011;**12**:145
  25. Li LC, Grimshaw JM, Nielsen C, et al. Use of communities of practice in business and health care sectors: a systematic review. *Implement Sci* 2009;**4**:27
  26. Crisp N. *Turning the world upside down : the search for global health in the 21st century*. London Royal Society of Medicine 2010.



27. European Science Foundation. Forward Look - Investigator-Driven Clinical Trials. Strasbourg: European Science

Foundation, 2009.

For peer review only

1  
2  
3  
4  
5  
6  
7  
8  
9  
10  
11  
12  
13  
14  
15  
16  
17  
18  
19  
20  
21  
22  
23  
24  
25  
26  
27  
28  
29  
30  
31  
32  
33  
34  
35  
36  
37  
38  
39  
40  
41  
42  
43  
44  
45  
46  
47  
48  
49  
50  
51  
52  
53  
54  
55  
56  
57  
58  
59  
60

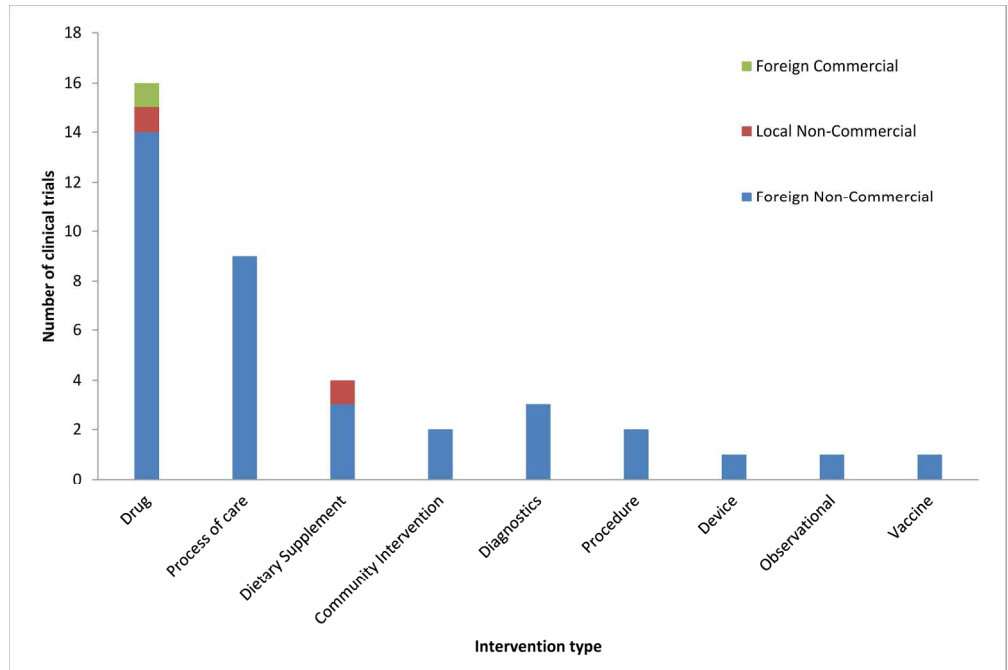

Figure 1: Number of clinical trials in Ethiopia by intervention type and sponsor, as registered on the WHO International Clinical Trials Registry Platform in the same period as data collection (30/04/2011). The observational study was registered as a clinical trial but was a cohort study with a nested cross-sectional design.

173x115mm (300 x 300 DPI)

ew only

| Current research related job role | Number of participants | Current and previous experience domains (number of participants with experience) |           |          |          |                       |                            |                     |                     |            |
|-----------------------------------|------------------------|----------------------------------------------------------------------------------|-----------|----------|----------|-----------------------|----------------------------|---------------------|---------------------|------------|
|                                   |                        | Trials experience                                                                |           |          | Academia | Clinical practitioner | Public health practitioner | Research leadership | Ethics board member | Government |
|                                   |                        | None                                                                             | FIT       | IIT      |          |                       |                            |                     |                     |            |
| <b>Clinical trial roles:</b>      |                        |                                                                                  |           |          |          |                       |                            |                     |                     |            |
| Principal investigator            | 1                      |                                                                                  | 1         |          |          | 1                     |                            | 1                   |                     |            |
| Co-investigator                   | 1                      |                                                                                  | 1         |          | 1        | 1                     |                            | 1                   |                     |            |
| Trial manager                     | 2                      |                                                                                  | 2         |          | 1        | 1                     |                            |                     |                     |            |
| Study coordinator                 | 3                      |                                                                                  | 3         |          |          | 2                     |                            |                     |                     |            |
| Laboratory manager                | 1                      |                                                                                  | 1         |          |          |                       |                            |                     |                     |            |
| Lab personnel                     | 4                      |                                                                                  | 4         |          |          |                       |                            |                     |                     |            |
| Nurse                             | 2                      |                                                                                  | 2         |          |          | 2                     |                            |                     |                     |            |
| <b>Non trial roles:</b>           |                        |                                                                                  |           |          |          |                       |                            |                     |                     |            |
| Senior medical researcher         | 5                      | 2                                                                                | 1         | 3        | 5        | 2                     | 2                          | 3                   | 2                   | 1          |
| Junior medical researcher         | 1                      | 1                                                                                |           |          | 1        |                       | 1                          |                     | 1                   |            |
| <b>Total</b>                      | <b>20</b>              | <b>3</b>                                                                         | <b>15</b> | <b>3</b> | <b>8</b> | <b>9</b>              | <b>3</b>                   | <b>5</b>            | <b>3</b>            | <b>1</b>   |

Figure 2: Recruitment matrix showing current research role and current and previous experience domains. Experience domains are not mutually exclusive and one participant can have multiple experience domains.  
173x58mm (300 x 300 DPI)

1  
2  
3  
4  
5  
6  
7  
8  
9  
10  
11  
12  
13  
14  
15  
16  
17  
18  
19  
20  
21  
22  
23  
24  
25  
26  
27  
28  
29  
30  
31  
32  
33  
34  
35  
36  
37  
38  
39  
40  
41  
42  
43  
44  
45  
46  
47  
48  
49  
50  
51  
52  
53  
54  
55  
56  
57  
58  
59  
60

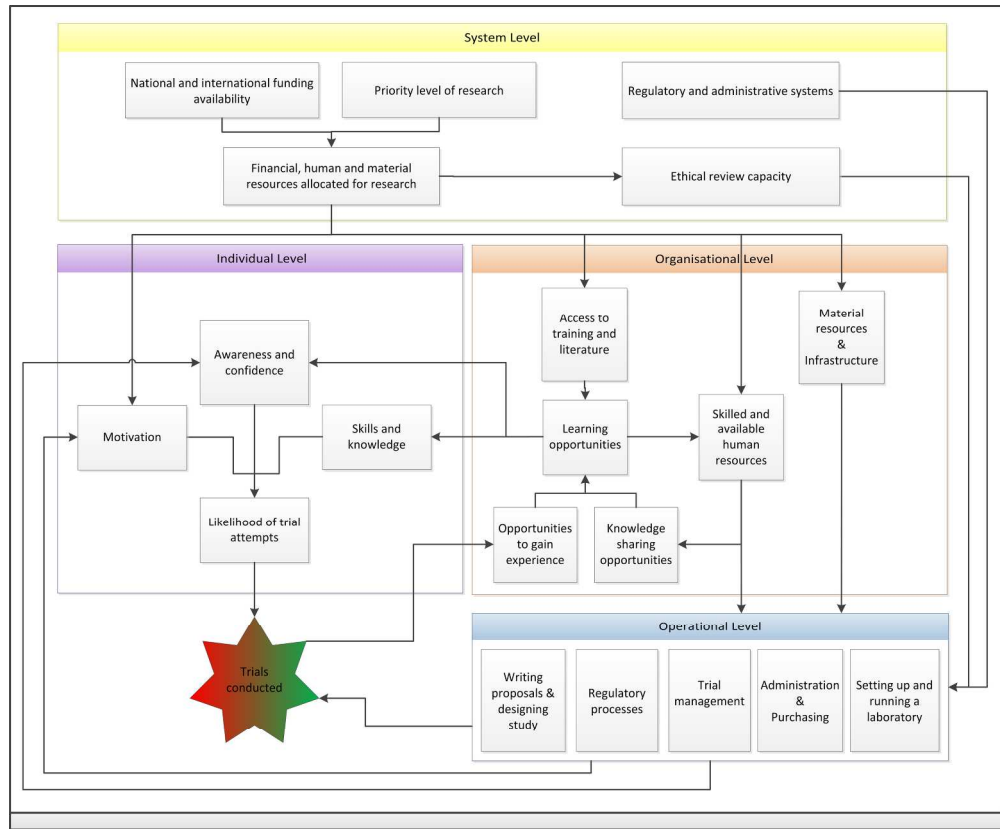

Figure 3: Mechanistic model of the factors influencing clinical trial conduct in Ethiopia 223x184mm (300 x 300 DPI)

For peer review only



**Understanding the investigators: a qualitative study  
investigating the barriers and enablers to the  
implementation of local investigator-initiated clinical trials  
in Ethiopia**

|                                 |                                                                                                                                                                                                                                                                                                                                                                                                                                                                                                                                                                                                                                                                                                                                                                                           |
|---------------------------------|-------------------------------------------------------------------------------------------------------------------------------------------------------------------------------------------------------------------------------------------------------------------------------------------------------------------------------------------------------------------------------------------------------------------------------------------------------------------------------------------------------------------------------------------------------------------------------------------------------------------------------------------------------------------------------------------------------------------------------------------------------------------------------------------|
| Journal:                        | <i>BMJ Open</i>                                                                                                                                                                                                                                                                                                                                                                                                                                                                                                                                                                                                                                                                                                                                                                           |
| Manuscript ID:                  | bmjopen-2013-003616.R1                                                                                                                                                                                                                                                                                                                                                                                                                                                                                                                                                                                                                                                                                                                                                                    |
| Article Type:                   | Research                                                                                                                                                                                                                                                                                                                                                                                                                                                                                                                                                                                                                                                                                                                                                                                  |
| Date Submitted by the Author:   | 12-Sep-2013                                                                                                                                                                                                                                                                                                                                                                                                                                                                                                                                                                                                                                                                                                                                                                               |
| Complete List of Authors:       | Franzen, Samuel; University of Oxford, The Global Health Network, Centre for Clinical Vaccinology & Tropical Medicine<br>Chandler, Clare; London School of Hygiene & Tropical Medicine, Global Health and Development<br>Enquselassie, Fikre; Addis Ababa University, Department of Preventive Medicine, College of Health Sciences<br>Siribaddana, Sisira; Rajarata University of Sri Lanka, Department of Medicine, Faculty of Medicine & Allied Sciences<br>Atashili, Julius; University of Buea, Department of Public Health and Hygiene, Faculty of Health Sciences<br>Angus, Brian; University of Oxford, Centre for Clinical Vaccinology & Tropical Medicine<br>Lang, Trudie; University of Oxford, The Global Health Network, Centre for Clinical Vaccinology & Tropical Medicine |
| <b>Primary Subject Heading</b>: | Global health                                                                                                                                                                                                                                                                                                                                                                                                                                                                                                                                                                                                                                                                                                                                                                             |
| Secondary Subject Heading:      | Research methods, Qualitative research, Infectious diseases, Medical education and training, Health policy                                                                                                                                                                                                                                                                                                                                                                                                                                                                                                                                                                                                                                                                                |
| Keywords:                       | Clinical Trial, Capacity Strengthening, Developing Country, Research Personnel, Research Organisation and Administration, TROPICAL MEDICINE                                                                                                                                                                                                                                                                                                                                                                                                                                                                                                                                                                                                                                               |
|                                 |                                                                                                                                                                                                                                                                                                                                                                                                                                                                                                                                                                                                                                                                                                                                                                                           |

SCHOLARONE™  
Manuscripts

**Article type:**

Research Article

**Article title:**

Understanding the investigators: a qualitative study investigating the barriers and enablers to the implementation of local investigator-initiated clinical trials in Ethiopia

**Short title:**

Barriers and enablers to local investigator-initiated clinical trials in Ethiopia

**Authors:**

Samuel R P Franzen<sup>1</sup>, Clare Chandler<sup>2</sup>, Fikre Enquesslassie<sup>3</sup>, Sisira Siribaddana<sup>4</sup>, Julius Atashili<sup>5</sup>, Brian Angus<sup>1</sup>, Trudie Lang<sup>1</sup>

**Corresponding Author:**

Samuel R P Franzen, The Global Health Network, Nuffield Department of Medicine Research Building, Centre for Tropical Medicine, University of Oxford, Old Road Campus, Roosevelt Drive, Headington, Oxford, U.K., OX3 7FZ  
Email: [sam@globalhealthtrials.org](mailto:sam@globalhealthtrials.org), Telephone: +44(0)1865612957

**Author Institutions:**

<sup>1</sup>The Global Health Network, Centre for Clinical Vaccinology & Tropical Medicine, University of Oxford, Oxford, UK.

<sup>2</sup> Department of Global Health and Development, London School of Hygiene & Tropical Medicine, London W, UK.

<sup>3</sup> Department of Preventive Medicine, College of Health Sciences, Addis Ababa University, Ethiopia

<sup>4</sup> Department of Medicine, Faculty of Medicine & Allied Sciences, Rajarata University of Sri Lanka, Saliyapura, Sri Lanka

<sup>5</sup> Department of Public Health and Hygiene, Faculty of Health Sciences, University of Buea, Buea, Cameroon

**Key Words/phrases – up to 5 (MeSH Terms)**

Clinical Trial [Topic]

Capacity Strengthening

Developing Country

Research Personnel

Research/ organization & administration

**Word Count:**

4790 (excluding title page, abstract, summary, references, legends, figures and tables)

## ABSTRACT

### Objectives

Clinical trials provide “gold standard” evidence for policy, but insufficient locally-relevant trials are conducted in Low- and Middle-Income countries. Local investigator-initiated trials could generate highly relevant data for national governments, but information is lacking on how to facilitate them. We aimed to identify barriers and enablers to investigator-initiated trials in Ethiopia to inform and direct capacity strengthening initiatives.

### Design

Exploratory, qualitative study comprising of in-depth interviews (n=7) and focus group discussions (n=3).

### Setting

Fieldwork took place in Ethiopia during March 2011.

### Participants

Local health researchers with previous experiences of clinical trials or stakeholders with an interest in trials were recruited through snowball sampling (n=20).

### Outcome measures

Detailed discussion notes were analysed using thematic coding analysis and key themes were identified.

### Results

All participants perceived investigator-initiated trials as important for generating local evidence. System and organisational barriers included: Limited funding allocation, weak regulatory and administrative systems, few learning opportunities, limited human and material capacity, and poor incentives for conducting research. Operational hurdles were symptomatic of these barriers. Lack of awareness, confidence and motivation to undertake trials were important individual barriers. Training, knowledge sharing and experience exchange were key enablers to trial conduct and collaboration was unanimously regarded as important for improving capacity.

### Conclusions

Barriers to trial conduct were found at individual, operational, organisational and system levels. These findings indicate that to increase locally-led trial conduct in Ethiopia, system wide changes are needed to create a more receptive and enabling research environment. Crucially, the creation of research networks between potential trial groups could provide much needed practical collaborative support through sharing of financial and project management burdens, knowledge and resources. These findings could have important implications for capacity strengthening initiatives but further research is needed before the results can be generalised more widely.

## ARTICLE SUMMARY

### Article focus

- Investigator-initiated clinical trials could provide much needed locally relevant evidence for Low-and Middle-Income Countries, but little is known about why so few are conducted
- The objective of this paper is to report the barriers and enablers to locally-led trial conduct in Ethiopia from the perspective of local-investigators
- We summarise key factors influencing investigator-initiated trial conduct and make suggestions for directing capacity strengthening efforts

### Key messages

- Barriers to clinical trial implementation were identified at every level of the research system, demonstrating the need for an integrated approach to research capacity strengthening
- Clinical trials are rarely attempted by local researchers because of unsupportive research environments
- There is a need to build a receptive research environment that creates awareness of trials, provides investigators' with the knowledge, confidence and incentives to conduct them and removes operational barriers

### Strengths and limitations

- To our knowledge this is the first empirical research study exploring investigator-initiated trial implementation in Low-and Middle-Income Countries
- Gives a compelling voice to local investigators who are often unheard in this Northern dominated discourse
- As a formative study, the sample size was small, the sampling purposive and the findings may be context specific



## INTRODUCTION

Many development organisations argue that clinical research in low and middle income countries (LMIC) is essential for improving public health and development.[1] In LMICs clinical research capacity remains insufficient. This perpetuates the “10/90 gap”, where only 10% of global health research expenditure is allocated to diseases that primarily affect 90% of the world’s population. This leads to a lack of evidence for the world’s most burdensome diseases.[2] Evidence from Northern nations is often not relevant to LMICs, [3] and its adoption into clinical practice can be slow and treated with caution.[1 ,4] Increasing the number of clinical trials conducted in LMICs would help generate local evidence,[4] which may be more likely to rapidly influence policy and practice.[5]

Most clinical trials conducted in LMICs are run by foreign research organisations with their own agendas. Recently there have been calls from within LMICs for more ownership over priority setting,[6] greater engagement with local research communities,[7] and research conducted in line with national health strategies.[8] Pragmatic, locally-initiated disease management studies could significantly improve public health.[4] Despite being simple and cost effective, they are often ignored by international trial groups,[9] and are rarely independently undertaken in LMICs. By “pragmatic” and “simple” we are referring to studies that are designed to test effectiveness, have few endpoints and broad eligibility criteria, thereby increasing external validity.[10 ,11]Meanwhile, there is increasing expectation that LMICs should take more responsibility for their research activities.[12] Increasing the number of local investigator-initiated trials (IITs) could be an answer to these issues. Several advantages of IITs over foreign-initiated trials (FITs) have been put forward (Table 1).

**Table 1 - Advantages of investigator-initiated trials over foreign-initiated trials**

- More applicable to local populations due to building on local healthcare knowledge [13]
- More demand-led and responsive to a country’s needs because they are driven by a national agenda [9]
- More likely to influence policy [13] and sustainably link research to action [14]
- Often simple studies that address important topics such as disease management [4 ,9]
- Involve local staff at all levels and stages of trial conduct,[15] so there is more opportunity for “learning by doing” and skill development [16]

The establishment of Africa-owned research centres capable of running their own clinical trials has been identified as an international priority,[17] and there are ever increasing numbers of clinical trials being conducted in LMICs.[4] However, few of these trials are locally initiated,[18] and globally, trials are becoming harder to implement.[4] Many research bodies have increased efforts to support IITs in Europe,[18 ,19] but within LMICs capacity building mostly focuses on developing sites to run international trials. Capacity building to support independent locally-led trials is likely to require a different approach. However, little is known about the best way to develop capacity and facilitate their conduct. This formative study investigates the issues facing local trial investigators in Ethiopia, and was designed to begin addressing this knowledge gap by determining the barriers and enablers to trial conduct.

## METHODS

We conducted a qualitative study using in-depth interviews (IDIs) and focus group discussions (FGDs). Research exercises took place in Addis Ababa and Gondar, Ethiopia, in March and April 2011. Ethiopia was selected to represent a country in Sub-Saharan Africa that conducts a modest number of clinical trials while having sufficient trial experience to contribute to this study. Ethiopia had 39 trials registered at the time of fieldwork; a breakdown of these by intervention and sponsor is shown in figure 1. The majority of drug trials investigated the use of approved drugs to optimise treatment.

This study seeks to understand the perspectives and experiences of current and potential trial investigators and staff. Due to the paucity of previous work on this topic, we did not prospectively adopt a specific theoretical

1 framework. However, research questions were influenced by the fields of organisational change and development.  
2 FGDs and IDIs were semi-structured and explored the following themes: the clinical research environment in  
3 Ethiopia, barriers and enablers to trial conduct, access to appropriate skills and knowledge, current support for  
4 clinical trials and recommendations for change. Questions were tailored to participants' experience and emerging  
5 themes.  
6

7 Participants were identified first through trial registration searches and subsequently by snowball sampling from  
8 these individuals. Health researchers with previous experiences of clinical trials or stakeholders with an interest in  
9 trials were selected. Of all the participants approached, none refused to take part. Interviews and discussions were  
10 conducted in English, and explored key points until no new information emerged. In preliminary meetings,  
11 participants said they would speak more openly if discussions were not audio recorded. This was because they  
12 would be uncomfortable criticising partners or regulatory bodies while being recorded. One participant explained  
13 that this worry was a result of the legacy left by previous authoritarian regimes. Detailed notes were taken with  
14 quotes noted as near verbatim as possible, detailing identification numbers.  
15  
16

17 This study was approved by the University of Oxford Tropical Research Ethics Committee. Verbal informed consent  
18 was obtained from all participants and review of discussion contributions and written confirmatory permission was  
19 obtained for all participants who could be contacted (15/20). No quotes are included from those who could not be  
20 contacted.  
21  
22

23 Notes were analysed by thematic coding analysis using Nvivo qualitative data analysis package (QSR International Pty  
24 Ltd. Version 9, 2011) to help organise the data. Data were coded inductively according to its semantic content.[20]  
25 Using relationship and modelling functions, a mechanistic model of factors influential to clinical trial conduct was  
26 developed through piecing together complementary segments of data contributed from different participants.  
27 Coding was completed by SF with consultation and agreement from other authors (TL, CC, and BA). Findings were  
28 reviewed and commented on by all authors.  
29  
30  
31  
32

## 33 RESULTS

### 34 Study population

35 We conducted 2 FGDs and 6 interviews in Addis Ababa and 1 FGD and 1 interview in Gondar. A total of 20  
36 researchers participated; 7 were based at a research centre, 1 at an NGO, 8 at a hospital and 4 at a university.  
37 Participants had varied job roles. Those currently working on a clinical trial included: Senior investigators (n=2), Trial  
38 managers and coordinators (n=5), laboratory personnel (n=5) and research nurses (n=2). We also recruited 6  
39 medical researchers not currently working on a clinical trial, 3 of whom had previous trial experience and 3 that did  
40 not. The participants had experience in a diverse range of medical professional experience domains (figure 2).  
41  
42  
43  
44

### 45 A role for investigator-initiated trials

46 All participants reported that too few clinical trials are conducted in Ethiopia, and felt this limited the ability for  
47 guidelines to be based on local evidence. Most treatment strategies were based on international guidelines, which  
48 many participants thought could be inappropriate. Participants proposed that locally-led trials would be useful for  
49 filling this evidence gap and that the conduct of simple design studies was independently achievable. Many  
50 researchers would like to lead their own studies and had important questions, but were often unsure how to go  
51 about doing this, as described by this senior clinician:  
52  
53  
54

55 *"We don't have the evidence to change local practices but we definitely know some written guidelines don't*  
56 *work. There are a number of unanswered questions for trials but we don't know how to do them. We need*  
57 *clinical research [in disease areas] that has a different effect in Ethiopia, for example HIV and TB. These*  
58 *diseases are similar as to other places but we have had little success [controlling them] here. So why? Where*  
59 *are the mistakes? These sorts of investigations are easy, they would support awareness and fill gaps."* FGD -  
60 3 PPT – 1

1 Compared to foreign-led studies, local trials were perceived to be more likely to address evidence gaps, be more  
2 useful for developing treatment guidelines, and more sensitive to community issues. One junior clinician described  
3 this through his experiences:  
4

5 *“Investigator-initiated trials increase evidence, particularly locally relevant evidence. For instance the*  
6 *Leishmania strain in Gondar seems to be a bit different to the other strains because the drug treatment is*  
7 *working better in the other areas. This will prevent mistakes in clinical care”*. INT - 6 PPT - 1  
8  
9

## 10 Human and Material capacity

11 While a general lack of materials, infrastructure and laboratory facilities were thought to reduce the number and  
12 scope of trials, most participants felt that human resources were the critical factor. Respondents stated that there  
13 were too few investigators with the technical expertise to initiate a trial. There was also a shortage of skilled  
14 research staff, with one investigator stating that if one or two staff left, their trial could not continue (FGD - 3 PPT -  
15 1- senior clinician and trial investigator). This lack of expertise and research skills was blamed on minimal research  
16 focus in clinical education, few opportunities to gain experience and few local experts who could share their  
17 knowledge.  
18  
19  
20

21 *“From my undergraduate experience, I was trained to be a clinician and not a researcher; this is from a*  
22 *curriculum point of view. Few clinicians use clinical trials as they are involved in primary care and not*  
23 *research. They have no spare time to think about research”..... “We need the opportunity to have a simple*  
24 *role and experience to get more people to do more trials. As more people get involved in simple research and*  
25 *trials, more research will be done”*. INT - 6 PPT – 1, Trial clinician  
26  
27  
28

29 Individuals skilled in trials were often too busy with regular duties to be able to conduct research. Most senior trial  
30 staff were clinicians and while release from routine duties could be negotiated, they complained that healthcare  
31 tasks still had to be prioritised. Academics had allocated time for research but this was regularly cited as insufficient.  
32 The limited manpower allocation to research and few opportunities to gain experience resulted in a negative  
33 feedback loop, as explained by this trial clinician:  
34  
35

36 *“The scope of activities is narrowed by the time and economic constraints and the fact few individuals can be*  
37 *involved. Because the scope is narrowed this results in a cycle of fewer people being involved, which in turn*  
38 *results in less motivation, fewer trials and less exposure and realising the way of thinking and less*  
39 *achievement. Then less people are involved and there are fewer trials”*. INT - 6 PPT - 1  
40  
41

## 42 Regulatory and other administrative bottlenecks

43 Respondents reported that complex and strict government regulations made it very difficult to investigate novel  
44 interventions and recruit vulnerable populations. Regulatory and ethical review times also introduced delays and it  
45 was not uncommon for grants to expire before all approvals were in place. A trial Principal Investigator (PI) explains  
46 this further:  
47  
48

49 *“Regulatory authorities have no clear guidelines so it is problematic getting approvals. They are also not*  
50 *experienced enough and so are overcautious and they cannot decide on interpretations”*. FGD -1 PPT -1, Trial  
51 PI  
52

53 Ethics committee members admitted that limited resources, knowledge gaps and membership shortages slowed  
54 review times, but also pointed out that poor quality applications meant re-submission was regularly required. They  
55 emphasised that clarification of regulations and developing review capacity were essential to facilitate trial  
56 implementation and that more training in research ethics was needed. One participant explained that The Ethiopian  
57 Bioethics Initiative is already working towards this. Funded by the European and Developing Countries Clinical Trial  
58 Partnership, The Ethiopian Bioethics Initiative helps research sites to form institutional review boards (IRBs) and  
59  
60

train the committee members on basic principles of ethical clearance. Under this grant they have established and trained 11 IRBs.

University and government administration systems were unanimously regarded as overly-complicated and blamed for many operational delays. To cope with this, many investigators said they required an administrative assistant but could not afford one.

*“The university finance department is a bottleneck. You really need an admin assistant to help with this. Most doctors do not want to go through the pain of organising and administrating all this. Also if you do not report your annual budget on time you may be penalised and have your salary suspended. The clinical trial financing really increases the amount of work you must do for your budget reporting. If I got a good grant I would hire an admin or research student to manage these issues.”* INT - 3 PPT -1, Clinician

## Operational hurdles

During one in-depth interview, a process mapping exercise was used as a template for discussion; the participant draws a detailed flow diagram of the steps and tasks involved in conducting their clinical trial, noting problems, successes, and changes to be made in hindsight. Table 2 describes the experience of one PI, providing an example case of operational hurdles and the importance of advanced planning.

**Table 2 - Experience of a local PI on a foreign NGO-led non-commercial study**

Registering the clinical trial caused considerable delays because task allocation was overlooked. Ethical approval for this relatively complex study took 12 months due to a cycle of resubmission. Ordering to delivery of supplies routinely took 3-6 months. Data entry and analysis were delayed because the data management system had not been considered early enough and training could only be obtained in Europe. Some laboratory tests were outsourced to a local private laboratory because staff lacked the training and equipment, while other assays were complicated by lack of normal ranges for local populations. In hindsight the PI would have taken more care with planning and preparation and made roles and responsibilities clear from the outset.

The majority of serious operational difficulties occurred during the start-up stage of trial conduct. Once intervention delivery began, there were few major challenges. Participants attributed most operational hurdles to wider issues. The main operational hurdles and their causes are summarised in Table 3. Operational enablers included: keeping trial designs simple, only investigating approved interventions and non-vulnerable populations to prevent regulatory delays, and rapid recruitment of participants due to large patient pools that were usually prepared to give consent.

| Operational Hurdles                                             | Reported causes                                                                                                                                                                                                                                                            |
|-----------------------------------------------------------------|----------------------------------------------------------------------------------------------------------------------------------------------------------------------------------------------------------------------------------------------------------------------------|
| 1. Difficulty writing proposals and gaining funding             | <ul style="list-style-type: none"> <li>• Little local funding, competitive international funding</li> <li>• Technical ability and confidence lacking</li> <li>• Unsure of funding process; investigators don't complete application</li> <li>• Lack of training</li> </ul> |
| 2. Slow regulatory and ethical approvals                        | <ul style="list-style-type: none"> <li>• Complex and unclear guidelines</li> <li>• Limited ethical review capacity</li> <li>• Poor quality submissions</li> </ul>                                                                                                          |
| 3. Problems with trial management                               | <ul style="list-style-type: none"> <li>• Lack of experience and poor planning</li> </ul>                                                                                                                                                                                   |
| 4. Burdensome administration and difficulty purchasing supplies | <ul style="list-style-type: none"> <li>• Complex and slow systems</li> <li>• No administrative support</li> </ul>                                                                                                                                                          |
| 5. Problems with setting up and running laboratory tests        | <ul style="list-style-type: none"> <li>• Limited funds and facilities</li> <li>• Difficulty purchasing supplies</li> <li>• Lack knowledge in technologically advanced procedures</li> </ul>                                                                                |

*Table 3: Participant reported operational hurdles and their causes*

## Initiating an idea: Awareness, Confidence and Motivation

Participants reported that limited awareness of trial research among their colleagues was a common reason for trials not being attempted. This was because potential investigators were not exposed to the methodology or had not considered doing them, as explained by this PI:

*“People do not have the vision that clinical trials will improve patient care because they do not see it in their daily lives. Clinical trials are important but essentially people do not see them enough to think of them”.* INT - 4 PPT -1, Senior Clinician

This was attributed to omissions in medical student curricula, limited access to literature, little trial research training and few trial opportunities. If individuals had considered conducting a trial, many participants said that most researchers were not confident to initiate one themselves because they lacked the knowledge and skills. Even investigators who had considerable experience on foreign-led studies said they did not feel ready to lead their own. The expectation of operational difficulties and few examples of role models successfully conducting trials created a “phobia” of trial research, with people believing them to be almost impossible. This “phobia” and lack of awareness was seen as a key barrier to trial conduct, as explained by this junior trial investigator:

*“We need to develop and support a research culture by capacity building to develop skills and resources, not big capacity building like an operating room, but small scale like small grants for beginner researchers to do research and get practice - this would take away the phobia of writing proposals and publications. When the phobia has gone there will be floods of research. We need to open our eyes and see what can be done. For instance people don't know how to write a proposal. In people's academic studies this sort of stuff is not given priority. Even small research will be an eye opener and the phobia will be gone.”* FGD - 3 PPT - 2, Clinician and junior investigator

Even when potential investigators felt ready to conduct a trial, many participants said that the motivation for undertaking them was insufficient and this discouraged their colleagues from attempting them. Participants were encouraged by altruistic incentives such as community health improvement and organisational development but personal career incentives were weak. A lack of research career options discouraged students from entering into research after studies or caused them to migrate for work, as this junior academic explained:

*“We need to make sure people get jobs and an established career in research to get them to stay in their home country or to come back to their home country after training or education abroad.”* INT - 2 PPT -1

Researchers also reported little recognition for research and that promotion could be achieved without doing research. Additionally, strong salary and workload disincentives were cited, as summarised by this IDI participant:

*“The problem is that this [clinical trial research] will take lots of your time and while it is possible to reduce your clinic hours, this means you would lose money. The country does not pay you even though it is for public benefit. There is no incentive, in short”.* INT - 4 PPT -1, Senior clinician

## The key enablers: Training, Knowledge Sharing and Experience Exchange

Equal to their value for building technical competence, many participants saw trial training, knowledge sharing and experience exchange as key enablers for increasing awareness, confidence and motivation. Training was viewed as important for awareness and encouraging staff to consider their workplace challenges in a more enquiring light. Knowledge sharing boosted researcher's confidence that trials were achievable and experience exchange was important for raising professional standards and dispelling what one respondent termed “pseudo-confidence” (INT - 4 PPT -1 - Clinician and trial PI); meaning to continue working in a sub-optimum way because knowledge of more rigorous methods was lacking. Many participants emphasised that all these enablers would be more effective if grounded in local examples and context, such as knowledge sharing with individuals whose settings were similar to the researcher's own. Learning activities were also highly motivational because they were prized for both personal and professional development. Given the scarcity of trial opportunities in Ethiopia, some participants suggested that

national or international experience exchange programmes would be useful. One FGD participant explained her trial team's experiences:

*"What we really want is for a south-south collaboration like Kenya or Uganda to do exchange placements for our junior staff. This would show people in resource-limited settings it is possible to do trials and would motivate people much more than website or e-learning.....She [referring to research nurse] has been to Kenya and Switzerland and this has helped her to see how clinical trials are done and what is good and bad and see the possibilities."* FGD - 3 PPT – 1, Senior clinician and trial investigator

## The importance of collaboration

While some respondents had negative experiences with foreign led-studies or said they would prefer to be less dependent on foreign groups, most participants were very positive about international collaboration, assuming intellectual independence could be protected. Technical expertise and infrastructure strengthening provided through collaborations were consistently proposed as a solution to the limited human and material resources. Particularly, collaborative grant applications had been very helpful for securing funding by increasing the quality and credibility of applications. Local and international collaboration was also seen as a key way to access and promote training, knowledge sharing and experience exchange. This senior academic summarises the general opinion:

*"The priority is addressing local concerns like field-based optimisation. Weight should be given to locally initiated ideas. However, you should then ask for international assistance and collaboration. The investigator-initiated trial is all about the idea and not about the operation. You do not have to re-invent the wheel; you should make the most of global knowledge and skills. Everyone should chip in with their appropriate competence and expertise. This way the work will be faster and more efficient and local researchers will have access to technologies".* INT - 1 PPT -1

However, junior participants said they lacked the contacts and knowledge to develop partnerships and even established researchers often felt intellectually isolated from the East African and wider research community. This was believed to hamper innovation and cause repetition of ideas.

## DISCUSSION

This study highlights that Ethiopian investigators think that investigator-initiated trials would generate highly useful and applicable data, supporting the call for more local evidence generation in LMICs. The challenge is implementing and successfully conducting a locally-led study. We have identified barriers to the implementation of investigator-initiated trials in Ethiopia at all levels of the research system. Exploring through the perspective of local investigators has given a critical understanding of how these issues influence their ability to initiate trials. We have highlighted the importance of training, knowledge sharing, experience exchange and collaboration, for breaking down barriers in somewhat unexpected ways and now consider, in light of this, how locally-led trials can be better supported.

### The research system

Health research systems represent the coordinated activities of all stakeholders to produce health research and may operate at local, national, regional or global levels. The four main functions of health research systems are: stewardship, financing, resources and producing and using research.[21] In Ethiopia, barriers and enablers to trial conduct have been identified at all levels of the national research system; system, organisational and individual. The main influential factors identified in this study have been summarised into a mechanistic model (Figure 3). The following description is intended to illustrate the interconnected nature of the barriers to trial research and how deficiencies at one level can have cascading negative effects. System level barriers impact on all levels through often dysfunctional regulatory and administrative systems, insufficient funding allocation and limited ethical review capacity. Suffering from limited resources, the organisational level provides limited learning opportunities, which negatively impacts on human resources. These deficiencies, combined with adverse regulatory and administrative systems, make operating clinical trials difficult. The combined effects of insufficient resources, limited learning

1 opportunities and difficult operations result in a disabling research environment at an individual level. This reduces  
2 awareness of trials, limits competence and confidence, and reduces motivation to undertake them. Few trials are  
3 attempted and this forms a negative feedback loop by reducing opportunities for experience.

4 A detailed review of the Ethiopian Health Research System also cites slow regulatory and ethical review, difficult  
5 administration systems, limited human resource allocation and few incentives as major impediments.[22] However  
6 it is important to emphasise that our description is not universal and individual examples of enabling practices are  
7 present. Nevertheless these results demonstrate the importance of taking a system-wide view to research  
8 development. Operational problems are embedded in wider issues, and while certain strategies may help  
9 investigators cope with problems, their resolution is dependent on strengthening capacity at all levels of the system.  
10 Fortunately in-country expertise exists in almost all major aspects of the health research system, which should  
11 greatly facilitate strengthening efforts.[22]

## 12 **Building a receptive research environment**

13 Although capacity to conduct trials was limited, most researchers agreed that simple design studies could be done.  
14 However, local investigators have attempted few trials. A key problem was the disabling research environment at  
15 the individual level. Clinical trials are a relatively new phenomenon and are not yet embedded in the Ethiopian  
16 research culture. Therefore their implementation can be viewed as a change within this culture. The ADKAR model  
17 for organisational change management, suggests that for a change to happen at an individual level, Awareness,  
18 Desire, Knowledge, Ability and Reinforcement must be present.[23] Trial awareness was limited and investigators did  
19 not have the vision that trials would improve patient care. Although most participants had the desire to lead a trial,  
20 they reported a general lack of knowledge and competence. For those that had the knowledge, many still felt unable  
21 to lead a trial, or were unwilling because of minimal motivational reinforcement.

22 This study and others,[24 ,25] suggest that increased learning opportunities and rewarding career paths are required  
23 to increase human resource capacity and retain skilled personnel. Increasing research components in taught courses,  
24 and providing training and small research grants for young researchers would increase awareness, desire and  
25 knowledge to conduct research. In Ethiopia, clinical academic staff have low salaries and are paid less than public  
26 sector physicians.[26] This, combined with limited funding, high teaching burdens, low quality facilities and  
27 frustrations with bureaucratic and operational hurdles found in this and another study,[26] all serve as strong  
28 disincentives to research. Providing protected time for research and recognising research within careers would help  
29 motivate investigators to undertake trials through positive reinforcement, but this alone may not be sufficient  
30 without adequate salaries to offset lost revenue from private practice and consultancy work.

31 Several participants expressed their inability to lead their own trial as a lack of confidence, or phobia, and  
32 investigators who had worked on foreign-led studies still did not feel ready to lead their own trial. Local funding and  
33 material capacity constraints were often cited as the cause, but many researchers had not applied for international  
34 funding. Expectation of insurmountable barriers and lack of successful role models certainly reduce confidence.  
35 However, it is possible that the intellectual isolation identified in this and another study,[26] and lack of a supportive  
36 research environment, could reduce initiative. We also propose that previous regimes that actively discouraged  
37 autonomy, could have left a legacy that reduced the ability of individuals to act as agents in change.

## 38 **Networking**

39 Collaboration was key to the provision of training, knowledge sharing and experience exchange, and accessing  
40 technical expertise and infrastructure strengthening. Better networking within and between local and international  
41 research organisations could facilitate the provision of these enablers, decrease intellectual isolation and help  
42 develop a National Health Research System. [22]

43 Successful local sites are often busy, so exchange placements could be organised to allow more individuals to get  
44 involved. This could potentially increase trial staff numbers and reduce the impact of task shifting on clinic work. This  
45 may then reverse the negative feedback loop between insufficient human resources and few trials. Local research

1 networks could support sustainable training models if a few experts become trainers of trainers and mentorship  
2 programmes linking experts to junior staff could provide inspirational support and guidance for isolated individuals.  
3 The need for administrative support in LMICs is common as many universities lack established research services.[25  
4 ,27] Cooperation between departments to form research clusters would make hiring an administrative assistant  
5 affordable and could help share the cost and burden of purchasing supplies.  
6

7 Creation of communities of practice could help to develop these relationships but proven strategies that foster their  
8 development are not clearly established.[28] Networking opportunities such as workshops would be useful, but  
9 firstly all stakeholders need to be identified and travel, time and cost can be barriers. Also, the informal nature of  
10 partnership formation in this study meant that less established researchers did not have the contacts or knowledge  
11 to find partners. One solution could be to develop a local and international online networking facility, detailing  
12 research interests, expertise, resources and current projects.  
13  
14

### 15 **Prioritising research systems**

16 Capacity building attached to foreign-led studies typically focuses on training individuals in specific skills or providing  
17 one specific service or resource. While this may get a particular study done, in Ethiopia, it does not appear to provide  
18 the package necessary to allow local investigators to conduct their own trials. This study demonstrates the diversity  
19 of factors influencing IIT implementation and shows that focusing on system wide improvements must be integral to  
20 any long-term research development plan for Ethiopia. For this to happen, we suggest that research must be  
21 prioritised, not just in terms of resource allocation but also the value placed on research. However, in a country with  
22 insufficient health workers to provide routine healthcare,[26] and many other competing priorities, this may be  
23 difficult.  
24  
25  
26

27 Despite this, such a value change could already be underway. The Ethiopian Science and Technology Agency devised  
28 strong implementation strategies to support research in 2006[29] and built on them in 2012.[30] The importance of  
29 research and developing research capacities is now central to the Ministry of Health Policy,[31] and  
30 recommendations for fostering a research culture in the New Public Universities have been developed.[32] Jimma  
31 University in South West Ethiopia has been applauded for pioneering new innovative teaching methods, valuing  
32 research within institutional culture and integrating it in career progress.[26 ,33] Meanwhile, The Ethiopian Bioethics  
33 Initiative is working hard to strengthen regulatory procedures and provides a successful example of developing  
34 ethical review capacity.  
35  
36  
37

### 38 **Strengths and Limitations**

39 As a formative study, the sample size and range of stakeholder roles was small, and the findings may be specific to  
40 the locations or dependent on contextual factors such as governance style. Although this limits the breadth of  
41 perspectives and generalisability of findings, the study sample accessed diverse experiences and used in-depth  
42 qualitative methods to uncover issues in a largely unexplored area, while giving a compelling voice to local  
43 investigators who are often unheard in this Northern dominated discourse. Inability to audio record the discussions  
44 may have had some impact on the accuracy of notes taken. However, we felt it was more important to ensure open  
45 and frank dialogue, and the detailed notes were subsequently reviewed by participants to ensure accurate  
46 representation. The recommendations in this study are congruent with those proposed by The Ethiopian Ministry of  
47 Science and Technology, [29 ,30] and also agree with much of the current international literature. This includes the  
48 key factors for an enabling research environment as identified by The Health Research System Analysis Initiative of  
49 WHO/RPC,[21] and recommendations for increasing investigator-initiated trial conduct by The European Science  
50 Foundation.[34] Nevertheless it was important to confirm that local investigators in LMICs held similar views as  
51 espoused by the above reports. Our subsequent research on this topic has been conducted in other settings,  
52 including a wider range of stakeholders in order to overcome these limitations.  
53  
54  
55  
56  
57  
58  
59  
60



## CONCLUSION

Developing research capacity to conduct investigator-initiated trials is multifaceted and likely to require a different strategy to traditional approaches that focus on individuals or capacity building for specific studies. Appreciation of the barriers and enablers at all levels must be central to development drives. While this study provides a preliminary step forward in this area, further work is needed to test these findings in other settings and to develop the thorough understanding required to successfully support these critical studies.

## FIGURE LEGENDS

*Figure 1: Number of clinical trials in Ethiopia by intervention type and sponsor, as registered on the WHO International Clinical Trials Registry Platform in the same period as data collection (30/04/2011). The observational study was registered as a clinical trial but was a cohort study with a nested cross-sectional design.*

*Figure 2: Participant experience of different medical professional experience domains. Experience domains are not mutually exclusive and one participant can have multiple experience domains.*

*Figure 3: Mechanistic model of the factors influencing clinical trial conduct in Ethiopia*

## EXCLUSIVE LICENCE STATEMENT, CONTRIBUTORS, ACKNOWLEDGMENTS, COMPETING INTERESTS, FUNDING, STUDY APPROVAL

### Exclusive licence statement

I Samuel Franzen the Corresponding Author of this article contained within the original manuscript which includes any diagrams & photographs, other illustrative material, video, film or any other material howsoever submitted by the Contributor(s) at any time and related to the Contribution ("the Contribution") have the right to grant on behalf of all authors and do grant on behalf of all authors, a licence to the BMJ Publishing Group Ltd and its licensees, to permit this Contribution (if accepted) to be published in BMJ Open and any other BMJ Group products and to exploit all subsidiary rights, as set out in the licence at: ([http://group.bmj.com/products/journals/instructions-for-authors/BMJOpen\\_licence.pdf](http://group.bmj.com/products/journals/instructions-for-authors/BMJOpen_licence.pdf))

### Contributor Statement

SF (PhD student) conceived, designed and implemented the study, analysed the data and drafted the manuscript with input and assistance from CC, BA and TL (PhD supervisors). FE, SS and JA collaborated on the interpretation of data and critically revised and reviewed the manuscript. All authors approved the final version of the manuscript.

### Acknowledgements

We would like to thank all the faculty, researchers and students who participated in the study in Ethiopia

### Competing interests

All authors declare that they have no competing interests

### Funding statement

This work was supported by The Global Health Network, a Bill and Melinda Gates Foundation funded project (grant reference: OPP1053843), and in part by a Nuffield Department of Medicine Doctoral Prize Studentship. The funders had no role in study sponsorship.

## Study approval

This study was approved by the University of Oxford Tropical Research Ethics Committee (OXTREC Reference 70-11)

## REFERENCES

1. Nuyens Y. No Development Without Research. Geneva: Global Forum for Health Research, 2005.
2. Davey S. The 10/90 Report on Health Research 2003-2004. Geneva: Global Forum for Health Research, 2004.
3. Garner P, Kale R, Dickson R, et al. Getting research findings into practice - Implementing research findings in developing countries. *Br Med J* 1998;**317**(7157):531-35.
4. Lang T, Siribaddana S. Clinical trials have gone global: is this a good thing? *PLoS Med* 2012;**9**(6):e1001228 doi: 10.1371/journal.pmed.1001228.
5. Page J, Heller RF, Kinlay S, et al. Attitudes of developing world physicians to where medical research is performed and reported. *BMC Public Health* 2003;**3**:6.
6. Jones N, M. B, Lyytikainen M. Research capacity strengthening in Africa: Trends, gaps and opportunities. London: Overseas Development Institute, 2007.
7. Aksoy S. Solutions to neglected tropical diseases require vibrant local scientific communities. *PLoS Negl Trop Dis* 2010;**4**(3):e662 doi: 10.1371/journal.pntd.0000662.
8. Dayrit MM, Poz MRD, Mercer H, et al. Towards evidence-informed policy-making in human resources for health: the state of research. Global Forum Update on Research for Health Volume 4. London: Pro-Books Publishing Ltd, 2007:160-62.
9. Devasenapathy N, Singh K, Prabhakaran D. Conduct of clinical trials in developing countries: a perspective. *Current Opinion in Cardiology* 2009;**24**(4):295-300 doi: Doi 10.1097/Hco.0b013e32832af21b.
10. Yusuf S, Collins R, Peto R. Why do we need some large, simple randomized trials? *Stat Med* 1984;**3**(4):409-22.
11. Godwin M, Ruhland L, Casson I, et al. Pragmatic controlled clinical trials in primary care: the struggle between external and internal validity. *BMC Med Res Methodol* 2003;**3**:28 doi: 10.1186/1471-2288-3-28.
12. Laabes EP, Desai R, Zawedde SM, et al. How much longer will Africa have to depend on western nations for support of its capacity-building efforts for biomedical research? *Trop Med Int Health* 2011;**16**(3):258-62 doi: 10.1111/j.1365-3156.2010.02709.x.
13. Costello A, Zumla A. Moving to research partnerships in developing countries. *Br Med J* 2000;**321**(7264):827-29.

- 1  
2  
3  
4  
5  
6  
7  
8  
9  
10  
11  
12  
13  
14  
15  
16  
17  
18  
19  
20  
21  
22  
23  
24  
25  
26  
27  
28  
29  
30  
31  
32  
33  
34  
35  
36  
37  
38  
39  
40  
41  
42  
43  
44  
45  
46  
47  
48  
49  
50  
51  
52  
53  
54  
55  
56  
57  
58  
59  
60
14. Chandiwana S, Ornbjerg N. Review of North-South and South-South cooperation and conditions necessary to sustain research capability in developing countries. *J Health Popul Nutr* 2003;**21**(3):288-97.
  15. Hoekman J, Frenken K, de Zeeuw D, et al. The geographical distribution of leadership in globalized clinical trials. *PLoS One* 2012;**7**(10):e45984 doi: 10.1371/journal.pone.0045984.
  16. Lansang MA, Dennis R. Building capacity in health research in the developing world. *Bull World Health Organ* 2004;**82**(10):764-70.
  17. Matsoso. P, Auton. M, Banoo. S, et al. How does the regulatory framework affect incentives for research and development? A proposal for a regulatory framework to improve regulatory capacity and introduce incentives for research and development in areas of public health importance. Geneva: World Health Organisation, 2005.
  18. Shafiq N, Pandhi P, Malhotra S. Investigator-initiated pragmatic trials in developing countries--much needed but much ignored. *Br J Clin Pharmacol* 2009;**67**(1):141-2 doi: 10.1111/j.1365-2125.2008.03291.x.
  19. Tyndall A. Why do we need noncommercial, investigator-initiated clinical trials? *Nat Clin Pract Rheum* 2008;**4**(7):354-55.
  20. Braun V, Clarke V. Using thematic analysis in psychology. *Qualitative Research in Psychology* 2006;**3**(2):34.
  21. World Health Organisation. World report on knowledge for better health: strengthening health systems. Geneva: World Health Organisation, 2004.
  22. Gaym A. Health research in Ethiopia--past, present and suggestions on the way forward. *Ethiop Med J* 2008;**46**(3):287-308.
  23. Hiatt J. ADKAR: A Model for Change in Business, Government and the Community. Loveland: Learning Centre Publications, 2006.
  24. Whitworth J, Sewankambo NK, Snewin VA. Improving implementation: building research capacity in maternal, neonatal, and child health in Africa. *PLoS Med* 2010;**7**(7):e1000299 doi: 10.1371/journal.pmed.1000299.
  25. Mullan F, Frehywot S, Omaswa F, et al. Medical schools in sub-Saharan Africa. *Lancet* 2011;**377**(9771):1113-21 doi: S0140-6736(10)61961-7.
  26. Chen C, Greysen R, Mipando M, et al. SAMSS Site Visit Report: Faculty of Health Sciences, School of Medicine, Jimma University, Ethiopia: SAMMS, 2009.  
<http://www.samss.org/samss.upload/wysiwyg/Full%20Site%20Visit%20Reports/Jimma%20-%20Ethiopia.pdf>  
(accessed 19/12/12).

- 1  
2  
3  
4  
5  
6  
7  
8  
9  
10  
11  
12  
13  
14  
15  
16  
17  
18  
19  
20  
21  
22  
23  
24  
25  
26  
27  
28  
29  
30  
31  
32  
33  
34  
35  
36  
37  
38  
39  
40  
41  
42  
43  
44  
45  
46  
47  
48  
49  
50  
51  
52  
53  
54  
55  
56  
57  
58  
59  
60
27. Mbuagbaw L, Thabane L, Ongolo-Zogo P, et al. The challenges and opportunities of conducting a clinical trial in a low resource setting: the case of the Cameroon mobile phone SMS (CAMPS) trial, an investigator initiated trial. *Trials* 2011;**12**:145 doi: 1745-6215-12-145.
28. Li LC, Grimshaw JM, Nielsen C, et al. Use of communities of practice in business and health care sectors: a systematic review. *Implement Sci* 2009;**4**:27 doi: 10.1186/1748-5908-4-27.
29. Ethiopian Science and Technology Agency. National Science, Technology and Innovation (STI) Policy of Ethiopia. Addis Ababa: Available at: [http://www.healthresearchweb.org/files/Ethiopia\\_National\\_S,T&I\\_Policy\\_Draft.2006.pdf](http://www.healthresearchweb.org/files/Ethiopia_National_S,T&I_Policy_Draft.2006.pdf), 2006.
30. Ministry of Science and Technology. The Federal Democratic Republic of Ethiopia Science, Technology and Innovation Policy. Addis Ababa: Available at: <http://www.most.gov.et/National%20STI%20Policy.htm> 2012.
31. Ethiopian Ministry of Health. Policies and Strategies. 2011; 2013(04/09/13). <http://www.moh.gov.et/English/Information/Pages/Policies%20and%20Strategies.aspx> (accessed 04/09/13).
32. Melis T, Ashcroft K, Macfarlane I, et al. Human capacity building needs analysis of Ethiopian new public universities (NPU): Development Assistance Group, Ethiopia, 2008.
33. Crisp N. Turning the world upside down : the search for global health in the 21st century. London Royal Society of Medicine 2010.
34. European Science Foundation. Forward Look - Investigator-Driven Clinical Trials. Strasbourg: European Science Foundation, 2009.

**Article type:**

Research Article

**Article title:**

Understanding the investigators: a qualitative study investigating the barriers and enablers to the implementation of local investigator-initiated clinical trials in Ethiopia

**Short title:**

Barriers and enablers to local investigator-initiated clinical trials in Ethiopia

**Authors:**

Samuel R P Franzen<sup>1</sup>, Clare Chandler<sup>2</sup>, Fikre Enquselassie<sup>3</sup>, Sisira Siribaddana<sup>4</sup>, Julius Atashili<sup>5</sup>, Brian Angus<sup>1</sup>, Trudie Lang<sup>1</sup>

**Corresponding Author:**

Samuel R P Franzen, The Global Health Network, Nuffield Department of Medicine Research Building, Centre for Tropical Medicine, University of Oxford, Old Road Campus, Roosevelt Drive, Headington, Oxford, U.K., OX3 7FZ  
Email: [sam@globalhealthtrials.org](mailto:sam@globalhealthtrials.org), Telephone: +44(0)1865612957

**Author Institutions:**

<sup>1</sup>The Global Health Network, Centre for Clinical Vaccinology & Tropical Medicine, University of Oxford, Oxford, UK.

<sup>2</sup>Department of Global Health and Development, London School of Hygiene & Tropical Medicine, London W, UK.

<sup>3</sup>Department of Preventive Medicine, College of Health Sciences, Addis Ababa University, Ethiopia

<sup>4</sup>Department of Medicine, Faculty of Medicine & Allied Sciences, Rajarata University of Sri Lanka, Saliyapura, Sri Lanka

<sup>5</sup>Department of Public Health and Hygiene, Faculty of Health Sciences, University of Buea, Buea, Cameroon

**Key Words/phrases – up to 5** (MeSH Terms)

Clinical Trial [Topic]

Capacity Strengthening

Developing Country

Research Personnel

Research/ organization &amp; administration

**Word Count:**

4790 (excluding title page, abstract, summary, references, legends, figures and tables)

**Comment [SRPF1]:** Word count increased from 4350 as a result of reviewers revisions

## ABSTRACT

### Objectives

Clinical trials provide “gold standard” evidence for policy, but insufficient locally-relevant trials are conducted in Low- and Middle-Income countries. Local investigator-initiated trials could generate highly relevant data for national governments, but information is lacking on how to facilitate them. We aimed to identify barriers and enablers to investigator-initiated trials in Ethiopia to inform and direct capacity strengthening initiatives.

### Design

Exploratory, qualitative study comprising of in-depth interviews (n=7) and focus group discussions (n=3).

### Setting

Fieldwork took place in Ethiopia during March 2011.

### Participants

Local health researchers with previous experiences of clinical trials or stakeholders with an interest in trials were recruited through snowball sampling (n=20).

### Outcome measures

Detailed discussion notes were analysed using thematic coding analysis and key themes were identified.

### Results

All participants perceived investigator-initiated trials as important for generating local evidence. System and organisational barriers included: **limited funding allocation**, **weak regulatory and administrative systems**, **few learning opportunities**, **limited human and material capacity**, and **poor incentives for conducting research**. Operational hurdles were symptomatic of these barriers. **Lack of awareness, confidence and motivation to undertake trials** were important individual barriers. **Training, knowledge sharing and experience exchange** were key enablers to trial conduct and **collaboration** was unanimously regarded as important for improving capacity.

### Conclusions

Barriers to trial conduct were found at individual, operational, organisational and system levels. These findings indicate that to increase locally-led trial conduct in Ethiopia, system wide changes are needed to create a more receptive and enabling research environment. Crucially, the creation of research networks between potential trial groups could provide much needed practical collaborative support through **sharing of financial and project management burdens**, **knowledge and resources**. These findings could have important implications for capacity strengthening initiatives but further research is needed before the results can be generalised more widely.

Comment [SRPF2]: Comment 3 revision

Comment [SRPF3]: Comment 4 revision

## ARTICLE SUMMARY

### Article focus

- Investigator-initiated clinical trials could provide much needed locally relevant evidence for Low-and Middle-Income Countries, but little is known about why so few are conducted
- The objective of this paper is to report the barriers and enablers to locally-led trial conduct in Ethiopia from the perspective of local-investigators
- We summarise key factors influencing investigator-initiated trial conduct and make suggestions for directing capacity strengthening efforts

Comment [SRPF4]: Comment 5 revision

### Key messages

- Barriers to clinical trial implementation were identified at every level of the research system, demonstrating the need for an integrated approach to research capacity strengthening
- Clinical trials are rarely attempted by local researchers because of unsupportive research environments
- There is a need to build a receptive research environment that creates awareness of trials, provides investigators' with the knowledge, confidence and incentives to conduct them and removes operational barriers

Comment [SRPF5]: Comment 6 revision

### Strengths and limitations

- To our knowledge this is the first empirical research study exploring investigator-initiated trial implementation in Low-and Middle-Income Countries
- Gives a compelling voice to local investigators who are often unheard in this Northern dominated discourse
- As a formative study, the sample size was small, the sampling purposive and the findings may be context specific

Comment [SRPF6]: Comment 22 revision

## INTRODUCTION

Many development organisations argue that clinical research in low and middle income countries (LMIC) is essential for improving public health and development.[1] In LMICs clinical research capacity remains insufficient. This perpetuates the “10/90 gap”, where only 10% of global health research expenditure is allocated to diseases that primarily affect 90% of the world’s population. This leads to a lack of evidence for the world’s most burdensome diseases.[2] Evidence from Northern nations is often not relevant to LMICs, [3] and its adoption into clinical practice can be slow and treated with caution.[1 ,4] Increasing the number of clinical trials conducted in LMICs would help generate local evidence,[4] which may be more likely to rapidly influence policy and practice.[5]

Comment [SF7]: Comment 26 revision

Most clinical trials conducted in LMICs are run by foreign research organisations with their own agendas. Recently there have been calls from within LMICs for more ownership over priority setting,[6] greater engagement with local research communities,[7] and research conducted in line with national health strategies.[8] Pragmatic, locally-initiated disease management studies could significantly improve public health.[4] Despite being simple and cost effective, they are often ignored by international trial groups,[9] and are rarely independently undertaken in LMICs. By “pragmatic” and “simple” we are referring to studies that are designed to test effectiveness, have few endpoints and broad eligibility criteria, thereby increasing external validity.[10 ,11] Meanwhile, there is increasing expectation that LMICs should take more responsibility for their research activities.[12] Increasing the number of local investigator-initiated trials (IITs) could be an answer to these issues. Several advantages of IITs over foreign-initiated trials (FITs) have been put forward (Table 1).

Comment [SRPF8]: Comment 8 revision

**Table 1 - Advantages of investigator-initiated trials over foreign-initiated trials**

- More applicable to local populations due to building on local healthcare knowledge [13]
- More demand-led and responsive to a country’s needs because they are driven by a national agenda [9]
- More likely to influence policy [13] and sustainably link research to action [14]
- Often simple studies that address important topics such as disease management [4 ,9]
- Involve local staff at all levels and stages of trial conduct,[15] so there is more opportunity for “learning by doing” and skill development [16]

Comment [SF9]: Comment 36 revision

The establishment of Africa-owned research centres capable of running their own clinical trials has been identified as an international priority,[17] and there are ever increasing numbers of clinical trials being conducted in LMICs.[4] However, few of these trials are locally initiated,[18] and globally, trials are becoming harder to implement.[4] Many research bodies have increased efforts to support IITs in Europe,[18 ,19] but within LMICs capacity building mostly focuses on developing sites to run international trials. Capacity building to support independent locally-led trials is likely to require a different approach. However, little is known about the best way to develop capacity and facilitate their conduct. This formative study investigates the issues facing local trial investigators in Ethiopia, and was designed to begin addressing this knowledge gap by determining the barriers and enablers to trial conduct.

Comment [SF10]: Comment 17 revision

## METHODS

We conducted a qualitative study using in-depth interviews (IDIs) and focus group discussions (FGDs). Research exercises took place in Addis Ababa and Gondar, Ethiopia, in March and April 2011. Ethiopia was selected to represent a country in Sub-Saharan Africa that conducts a modest number of clinical trials while having sufficient trial experience to contribute to this study. Ethiopia had 39 trials registered at the time of fieldwork; a breakdown of these by intervention and sponsor is shown in figure 1. The majority of drug trials investigated the use of approved drugs to optimise treatment.

This study seeks to understand the perspectives and experiences of current and potential trial investigators and staff. Due to the paucity of previous work on this topic, we did not prospectively adopt a specific theoretical



framework. However, research questions were influenced by the fields of organisational change and development. FGDs and IDIs were semi-structured and explored the following themes: the clinical research environment in Ethiopia, barriers and enablers to trial conduct, access to appropriate skills and knowledge, current support for clinical trials and recommendations for change. Questions were tailored to participants' experience and emerging themes.

Participants were identified first through trial registration searches and subsequently by snowball sampling from these individuals. Health researchers with previous experiences of clinical trials or stakeholders with an interest in trials were selected. Of all the participants approached, none refused to take part. Interviews and discussions were conducted in English, and explored key points until no new information emerged. In preliminary meetings, participants said they would speak more openly if discussions were not audio recorded. This was because they would be uncomfortable criticising partners or regulatory bodies while being recorded. One participant explained that this worry was a result of the legacy left by previous authoritarian regimes. Detailed notes were taken with quotes noted as near verbatim as possible, detailing identification numbers.

**Comment [SRPF11]:** Response 16, 28 and 40 revision

This study was approved by the University of Oxford Tropical Research Ethics Committee. Verbal informed consent was obtained from all participants and review of discussion contributions and written confirmatory permission was obtained for all participants who could be contacted (15/20). No quotes are included from those who could not be contacted.

Notes were analysed by thematic coding analysis using Nvivo qualitative data analysis package (QSR International Pty Ltd. Version 9, 2011) to help organise the data. Data were coded inductively according to its semantic content.[20] Using relationship and modelling functions, a mechanistic model of factors influential to clinical trial conduct was developed through piecing together complementary segments of data contributed from different participants. Coding was completed by SF with consultation and agreement from other authors (TL, CC, and BA). Findings were reviewed and commented on by all authors.

## RESULTS

### Study population

We conducted 2 FGDs and 6 interviews in Addis Ababa and 1 FGD and 1 interview in Gondar. A total of 20 researchers participated; 7 were based at a research centre, 1 at an NGO, 8 at a hospital and 4 at a university. Participants had varied job roles. Those currently working on a clinical trial included: Senior investigators (n=2), Trial managers and coordinators (n=5), laboratory personnel (n=5) and research nurses (n=2). We also recruited 6 medical researchers not currently working on a clinical trial, 3 of whom had previous trial experience and 3 that did not. The participants had experience in a diverse range of medical professional experience domains (figure 2).

**Comment [SRPF12]:** Comment 11 amendment

### A role for investigator-initiated trials

All participants reported that too few clinical trials are conducted in Ethiopia, and felt this limited the ability for guidelines to be based on local evidence. Most treatment strategies were based on international guidelines, which many participants thought could be inappropriate. Participants proposed that locally-led trials would be useful for filling this evidence gap and that the conduct of simple design studies was independently achievable. Many researchers would like to lead their own studies and had important questions, but were often unsure how to go about doing this, as described by this senior clinician:

**Comment [SRPF13]:** Comment 41 revision

*"We don't have the evidence to change local practices but we definitely know some written guidelines don't work. There are a number of unanswered questions for trials but we don't know how to do them. We need clinical research [in disease areas] that has a different effect in Ethiopia, for example HIV and TB. These diseases are similar as to other places but we have had little success [controlling them] here. So why? Where are the mistakes? These sorts of investigations are easy, they would support awareness and fill gaps."* FGD - 3 PPT - 1

1  
2  
3  
4  
5  
6 Compared to foreign-led studies, local trials were perceived to be more likely to address evidence gaps, be more  
7 useful for developing treatment guidelines, and more sensitive to community issues. One junior clinician described  
8 this through his experiences:  
9

10 *“Investigator-initiated trials increase evidence, particularly locally relevant evidence. For instance the*  
11 *Leishmania strain in Gondar seems to be a bit different to the other strains because the drug treatment is*  
12 *working better in the other areas. This will prevent mistakes in clinical care”*. INT - 6 PPT - 1  
13

#### 14 **Human and Material capacity**

15  
16 While a general lack of materials, infrastructure and laboratory facilities were thought to reduce the number and  
17 scope of trials, most participants felt that human resources were the critical factor. Respondents stated that there  
18 were too few investigators with the technical expertise to initiate a trial. There was also a shortage of skilled  
19 research staff, with one investigator stating that if one or two staff left, their trial could not continue (FGD - 3 PPT -  
20 1- senior clinician and trial investigator). This lack of expertise and research skills was blamed on minimal research  
21 focus in clinical education, few opportunities to gain experience and few local experts who could share their  
22 knowledge.  
23

24 *“From my undergraduate experience, I was trained to be a clinician and not a researcher; this is from a*  
25 *curriculum point of view. Few clinicians use clinical trials as they are involved in primary care and not*  
26 *research. They have no spare time to think about research”..... “We need the opportunity to have a simple*  
27 *role and experience to get more people to do more trials. As more people get involved in simple research and*  
28 *trials, more research will be done”*. INT - 6 PPT – 1, Trial clinician  
29

30 Individuals skilled in trials were often too busy with regular duties to be able to conduct research. Most senior trial  
31 staff were clinicians and while release from routine duties could be negotiated, they complained that healthcare  
32 tasks still had to be prioritised. Academics had allocated time for research but this was regularly cited as insufficient.  
33 The limited manpower allocation to research and few opportunities to gain experience resulted in a negative  
34 feedback loop, as explained by this trial clinician:  
35

36 *“The scope of activities is narrowed by the time and economic constraints and the fact few individuals can be*  
37 *involved. Because the scope is narrowed this results in a cycle of fewer people being involved, which in turn*  
38 *results in less motivation, fewer trials and less exposure and realising the way of thinking and less*  
39 *achievement. Then less people are involved and there are fewer trials”*. INT - 6 PPT - 1  
40

#### 41 **Regulatory and other administrative bottlenecks**

42 Respondents reported that complex and strict government regulations made it very difficult to investigate novel  
43 interventions and recruit vulnerable populations. Regulatory and ethical review times also introduced delays and it  
44 was not uncommon for grants to expire before all approvals were in place. A trial Principal Investigator (PI) explains  
45 this further:  
46

47 *“Regulatory authorities have no clear guidelines so it is problematic getting approvals. They are also not*  
48 *experienced enough and so are overcautious and they cannot decide on interpretations”*. FGD -1 PPT -1, Trial  
49 PI

50 Ethics committee members admitted that limited resources, knowledge gaps and membership shortages slowed  
51 review times, but also pointed out that poor quality applications meant re-submission was regularly required. They  
52 emphasised that clarification of regulations and developing review capacity were essential to facilitate trial  
53 implementation and that more training in research ethics was needed. One participant explained that The Ethiopian  
54 Bioethics Initiative is already working towards this. Funded by the European and Developing Countries Clinical Trial  
55 Partnership, The Ethiopian Bioethics Initiative helps research sites to form institutional review boards (IRBs) and  
56  
57  
58  
59  
60

train the committee members on basic principles of ethical clearance. Under this grant they have established and trained 11 IRBs.

**Comment [SF14]:** Revisions for comment 20, 30 and 45

University and government administration systems were unanimously regarded as overly-complicated and blamed for many operational delays. To cope with this, many investigators said they required an administrative assistant but could not afford one.

*“The university finance department is a bottleneck. You really need an admin assistant to help with this. Most doctors do not want to go through the pain of organising and administrating all this. Also if you do not report your annual budget on time you may be penalised and have your salary suspended. The clinical trial financing really increases the amount of work you must do for your budget reporting. If I got a good grant I would hire an admin or research student to manage these issues.”* INT - 3 PPT -1, Clinician

**Operational hurdles**

During one in-depth interview, a process mapping exercise was used as a template for discussion; the participant draws a detailed flow diagram of the steps and tasks involved in conducting their clinical trial, noting problems, successes, and changes to be made in hindsight. Table 2 describes the experience of one PI, providing an example case of operational hurdles and the importance of advanced planning.

**Table 2 - Experience of a local PI on a foreign NGO-led non-commercial study**

Registering the clinical trial caused considerable delays because task allocation was overlooked. Ethical approval for this relatively complex study took 12 months due to a cycle of resubmission. Ordering to delivery of supplies routinely took 3-6 months. Data entry and analysis were delayed because the data management system had not been considered early enough and training could only be obtained in Europe. Some laboratory tests were outsourced to a local private laboratory because staff lacked the training and equipment, while other assays were complicated by lack of normal ranges for local populations. In hindsight the PI would have taken more care with planning and preparation and made roles and responsibilities clear from the outset.

The majority of serious operational difficulties occurred during the start-up stage of trial conduct. Once intervention delivery began, there were few major challenges. Participants attributed most operational hurdles to wider issues. The main operational hurdles and their causes are summarised in Table 3. Operational enablers included: keeping trial designs simple, only investigating approved interventions and non-vulnerable populations to prevent regulatory delays, and rapid recruitment of participants due to large patient pools that were usually prepared to give consent.

**Comment [SF15]:** Comment 29 revisions

| Operational Hurdles                                             | Reported causes                                                                                                                                                                                                                                                            |
|-----------------------------------------------------------------|----------------------------------------------------------------------------------------------------------------------------------------------------------------------------------------------------------------------------------------------------------------------------|
| 1. Difficulty writing proposals and gaining funding             | <ul style="list-style-type: none"> <li>• Little local funding, competitive international funding</li> <li>• Technical ability and confidence lacking</li> <li>• Unsure of funding process; investigators don't complete application</li> <li>• Lack of training</li> </ul> |
| 2. Slow regulatory and ethical approvals                        | <ul style="list-style-type: none"> <li>• Complex and unclear guidelines</li> <li>• Limited ethical review capacity</li> <li>• Poor quality submissions</li> </ul>                                                                                                          |
| 3. Problems with trial management                               | <ul style="list-style-type: none"> <li>• Lack of experience and poor planning</li> </ul>                                                                                                                                                                                   |
| 4. Burdensome administration and difficulty purchasing supplies | <ul style="list-style-type: none"> <li>• Complex and slow systems</li> <li>• No administrative support</li> </ul>                                                                                                                                                          |
| 5. Problems with setting up and running laboratory tests        | <ul style="list-style-type: none"> <li>• Limited funds and facilities</li> <li>• Difficulty purchasing supplies</li> <li>• Lack knowledge in technologically advanced procedures</li> </ul>                                                                                |

Table 3: Participant reported operational hurdles and their causes

## Initiating an idea: Awareness, Confidence and Motivation

Participants reported that limited awareness of trial research among their colleagues was a common reason for trials not being attempted. This was because potential investigators were not exposed to the methodology or had not considered doing them, as explained by this PI:

Comment [SRPF16]: Comment 1 revision

*“People do not have the vision that clinical trials will improve patient care because they do not see it in their daily lives. Clinical trials are important but essentially people do not see them enough to think of them”. INT - 4 PPT -1, Senior Clinician*

This was attributed to omissions in medical student curricula, limited access to literature, little trial research training and few trial opportunities. If individuals had considered conducting a trial, many participants said that most researchers were not confident to initiate one themselves because they lacked the knowledge and skills. Even investigators who had considerable experience on foreign-led studies said they did not feel ready to lead their own. The expectation of operational difficulties and few examples of role models successfully conducting trials created a “phobia” of trial research, with people believing them to be almost impossible. This “phobia” and lack of awareness was seen as a key barrier to trial conduct, as explained by this junior trial investigator:

Comment [SRPF17]: Comment 1 revision

*“We need to develop and support a research culture by capacity building to develop skills and resources, not big capacity building like an operating room, but small scale like small grants for beginner researchers to do research and get practice - this would take away the phobia of writing proposals and publications. When the phobia has gone there will be floods of research. We need to open our eyes and see what can be done. For instance people don't know how to write a proposal. In people's academic studies this sort of stuff is not given priority. Even small research will be an eye opener and the phobia will be gone.” FGD - 3 PPT - 2, Clinician and junior investigator*

Even when potential investigators felt ready to conduct a trial, many participants said that the motivation for undertaking them was insufficient and this discouraged their colleagues from attempting them. Participants were encouraged by altruistic incentives such as community health improvement and organisational development but personal career incentives were weak. A lack of research career options discouraged students from entering into research after studies or caused them to migrate for work, as this junior academic explained:

Comment [SRPF18]: Comment 1 revision

*“We need to make sure people get jobs and an established career in research to get them to stay in their home country or to come back to their home country after training or education abroad.” INT - 2 PPT -1*

Researchers also reported little recognition for research and that promotion could be achieved without doing research. Additionally, strong salary and workload disincentives were cited, as summarised by this IDI participant:

*“The problem is that this [clinical trial research] will take lots of your time and while it is possible to reduce your clinic hours, this means you would lose money. The country does not pay you even though it is for public benefit. There is no incentive, in short”. INT - 4 PPT -1, Senior clinician*

## The key enablers: Training, Knowledge Sharing and Experience Exchange

Equal to their value for building technical competence, many participants saw trial training, knowledge sharing and experience exchange as key enablers for increasing awareness, confidence and motivation. Training was viewed as important for awareness and encouraging staff to consider their workplace challenges in a more enquiring light. Knowledge sharing boosted researcher's confidence that trials were achievable and experience exchange was important for raising professional standards and dispelling what one respondent termed “pseudo-confidence” (INT - 4 PPT -1 - Clinician and trial PI); meaning to continue working in a sub-optimum way because knowledge of more rigorous methods was lacking. Many participants emphasised that all these enablers would be more effective if grounded in local examples and context, such as knowledge sharing with individuals whose settings were similar to the researcher's own. Learning activities were also highly motivational because they were prized for both personal and professional development. Given the scarcity of trial opportunities in Ethiopia, some participants suggested that

national or international experience exchange programmes would be useful. One FGD participant explained her trial team's experiences:

*"What we really want is for a south-south collaboration like Kenya or Uganda to do exchange placements for our junior staff. This would show people in resource-limited settings it is possible to do trials and would motivate people much more than website or e-learning.....She [referring to research nurse] has been to Kenya and Switzerland and this has helped her to see how clinical trials are done and what is good and bad and see the possibilities."* FGD - 3 PPT – 1, Senior clinician and trial investigator

### The importance of collaboration

While some respondents had negative experiences with foreign led-studies or said they would prefer to be less dependent on foreign groups, most participants were very positive about international collaboration, assuming intellectual independence could be protected. Technical expertise and infrastructure strengthening provided through collaborations were consistently proposed as a solution to the limited human and material resources. Particularly, collaborative grant applications had been very helpful for securing funding by increasing the quality and credibility of applications. Local and international collaboration was also seen as a key way to access and promote training, knowledge sharing and experience exchange. This senior academic summarises the general opinion:

*"The priority is addressing local concerns like field-based optimisation. Weight should be given to locally initiated ideas. However, you should then ask for international assistance and collaboration. The investigator-initiated trial is all about the idea and not about the operation. You do not have to re-invent the wheel; you should make the most of global knowledge and skills. Everyone should chip in with their appropriate competence and expertise. This way the work will be faster and more efficient and local researchers will have access to technologies".* INT - 1 PPT -1

However, junior participants said they lacked the contacts and knowledge to develop partnerships and even established researchers often felt intellectually isolated from the East African and wider research community. This was believed to hamper innovation and cause repetition of ideas.

## DISCUSSION

This study highlights that Ethiopian investigators think that investigator-initiated trials would generate highly useful and applicable data, supporting the call for more local evidence generation in LMICs. The challenge is implementing and successfully conducting a locally-led study. We have identified barriers to the implementation of investigator-initiated trials in Ethiopia at all levels of the research system. Exploring through the perspective of local investigators has given a critical understanding of how these issues influence their ability to initiate trials. We have highlighted the importance of training, knowledge sharing, experience exchange and collaboration, for breaking down barriers in somewhat unexpected ways and now consider, in light of this, how locally-led trials can be better supported.

### The research system

Health research systems represent the coordinated activities of all stakeholders to produce health research and may operate at local, national, regional or global levels. The four main functions of health research systems are: stewardship, financing, resources and producing and using research.[21] In Ethiopia, barriers and enablers to trial conduct have been identified at all levels of the national research system; system, organisational and individual. The main influential factors identified in this study have been summarised into a mechanistic model (Figure 3).

The following description is intended to illustrate the interconnected nature of the barriers to trial research and how deficiencies at one level can have cascading negative effects. System level barriers impact on all levels through often dysfunctional regulatory and administrative systems, insufficient funding allocation and limited ethical review capacity. Suffering from limited resources, the organisational level provides limited learning opportunities, which negatively impacts on human resources. These deficiencies, combined with adverse regulatory and administrative

Comment [SRPF19]: Comment 19 revision

Comment [SRPF20]: Comment 45 revision

1  
2  
3  
4  
5 systems, make operating clinical trials difficult. The combined effects of insufficient resources, limited learning  
6 opportunities and difficult operations result in a disabling research environment at an individual level. This reduces  
7 awareness of trials, limits competence and confidence, and reduces motivation to undertake them. Few trials are  
8 attempted and this forms a negative feedback loop by reducing opportunities for experience.  
9

10 A detailed review of the Ethiopian Health Research System also cites slow regulatory and ethical review, difficult  
11 administration systems, limited human resource allocation and few incentives as major impediments.[22] However  
12 it is important to emphasise that our description is not universal and individual examples of enabling practices are  
13 present. Nevertheless these results demonstrate the importance of taking a system-wide view to research  
14 development. Operational problems are embedded in wider issues, and while certain strategies may help  
15 investigators cope with problems, their resolution is dependent on strengthening capacity at all levels of the system.  
16 Fortunately in-country expertise exists in almost all major aspects of the health research system, which should  
17 greatly facilitate strengthening efforts.[22]

Comment [SRPF21]: Comment 45 revision

Comment [SRPF22]: Comment 45 revision

### 19 Building a receptive research environment

20 Although capacity to conduct trials was limited, most researchers agreed that simple design studies could be done.  
21 However, local investigators have attempted few trials. A key problem was the disabling research environment at  
22 the individual level. Clinical trials are a relatively new phenomenon and are not yet embedded in the Ethiopian  
23 research culture. Therefore their implementation can be viewed as a change within this culture. The ADKAR model  
24 for organisational change management, suggests that for a change to happen at an individual level, Awareness,  
25 Desire, Knowledge, Ability and Reinforcement must be present.[23] Trial awareness was limited and investigators did  
26 not have the vision that trials would improve patient care. Although most participants had the desire to lead a trial,  
27 they reported a general lack of knowledge and competence. For those that had the knowledge, many still felt unable  
28 to lead a trial, or were unwilling because of minimal motivational reinforcement.  
29

30 This study and others,[24 ,25] suggest that increased learning opportunities and rewarding career paths are required  
31 to increase human resource capacity and retain skilled personnel. Increasing research components in taught courses,  
32 and providing training and small research grants for young researchers would increase awareness, desire and  
33 knowledge to conduct research. In Ethiopia, clinical academic staff have low salaries and are paid less than public  
34 sector physicians.[26] This, combined with limited funding, high teaching burdens, low quality facilities and  
35 frustrations with bureaucratic and operational hurdles found in this and another study,[26] all serve as strong  
36 disincentives to research. Providing protected time for research and recognising research within careers would help  
37 motivate investigators to undertake trials through positive reinforcement, but this alone may not be sufficient  
38 without adequate salaries to offset lost revenue from private practice and consultancy work.

Comment [SF23]: Revision for comment 31

39  
40 Several participants expressed their inability to lead their own trial as a lack of confidence, or phobia, and  
41 investigators who had worked on foreign-led studies still did not feel ready to lead their own trial. Local funding and  
42 material capacity constraints were often cited as the cause, but many researchers had not applied for international  
43 funding. Expectation of insurmountable barriers and lack of successful role models certainly reduce confidence.  
44 However, it is possible that the intellectual isolation identified in this and another study,[26] and lack of a supportive  
45 research environment, could reduce initiative. We also propose that previous regimes that actively discouraged  
46 autonomy, could have left a legacy that reduced the ability of individuals to act as agents in change.

Comment [SRPF24]: Comment 16 and 46  
revision

### 48 Networking

49 Collaboration was key to the provision of training, knowledge sharing and experience exchange, and accessing  
50 technical expertise and infrastructure strengthening. Better networking within and between local and international  
51 research organisations could facilitate the provision of these enablers, decrease intellectual isolation and help  
52 develop a National Health Research System. [22]  
53

54 Successful local sites are often busy, so exchange placements could be organised to allow more individuals to get  
55 involved. This could potentially increase trial staff numbers and reduce the impact of task shifting on clinic work. This  
56  
57  
58  
59  
60

1  
2  
3  
4  
5 may then reverse the negative feedback loop between insufficient human resources and few trials. Local research  
6 networks could support sustainable training models if a few experts become trainers of trainers and mentorship  
7 programmes linking experts to junior staff could provide inspirational support and guidance for isolated individuals.  
8 The need for administrative support in LMICs is common as many universities lack established research services.[25  
9 ,27] Cooperation between departments to form research clusters would make hiring an administrative assistant  
10 affordable and could help share the cost and burden of purchasing supplies.  
11

12 Creation of communities of practice could help to develop these relationships but proven strategies that foster their  
13 development are not clearly established.[28] Networking opportunities such as workshops would be useful, but  
14 firstly all stakeholders need to be identified and travel, time and cost can be barriers. Also, the informal nature of  
15 partnership formation in this study meant that less established researchers did not have the contacts or knowledge  
16 to find partners. One solution could be to develop a local and international online networking facility, detailing  
17 research interests, expertise, resources and current projects.  
18

### 19 **Prioritising research systems**

20 Capacity building attached to foreign-led studies typically focuses on training individuals in specific skills or providing  
21 one specific service or resource. While this may get a particular study done, in Ethiopia, it does not appear to provide  
22 the package necessary to allow local investigators to conduct their own trials. This study demonstrates the diversity  
23 of factors influencing IIT implementation and shows that focusing on system wide improvements must be integral to  
24 any long-term research development plan for Ethiopia. For this to happen, we suggest that research must be  
25 prioritised, not just in terms of resource allocation but also the value placed on research. However, in a country with  
26 insufficient health workers to provide routine healthcare,[26] and many other competing priorities, this may be  
27 difficult.  
28

29 Despite this, such a value change could already be underway. The Ethiopian Science and Technology Agency devised  
30 strong implementation strategies to support research in 2006[29] and built on them in 2012.[30] The importance of  
31 research and developing research capacities is now central to the Ministry of Health Policy,[31] and  
32 recommendations for fostering a research culture in the New Public Universities have been developed.[32] Jimma  
33 University in South West Ethiopia has been applauded for pioneering new innovative teaching methods, valuing  
34 research within institutional culture and integrating it in career progress.[26, 33] Meanwhile, The Ethiopian Bioethics  
35 Initiative is working hard to strengthen regulatory procedures and provides a successful example of developing  
36 ethical review capacity.  
37

### 38 **Strengths and Limitations**

39 As a formative study, the sample size and range of stakeholder roles was small, and the findings may be specific to  
40 the locations or dependent on contextual factors such as governance style. Although this limits the breadth of  
41 perspectives and generalisability of findings, the study sample accessed diverse experiences and used in-depth  
42 qualitative methods to uncover issues in a largely unexplored area, while giving a compelling voice to local  
43 investigators who are often unheard in this Northern dominated discourse. Inability to audio record the discussions  
44 may have had some impact on the accuracy of notes taken. However, we felt it was more important to ensure open  
45 and frank dialogue, and the detailed notes were subsequently reviewed by participants to ensure accurate  
46 representation. The recommendations in this study are congruent with those proposed by The Ethiopian Ministry of  
47 Science and Technology, [29,30] and also agree with much of the current international literature. This includes the  
48 key factors for an enabling research environment as identified by The Health Research System Analysis Initiative of  
49 WHO/RPC,[21] and recommendations for increasing investigator-initiated trial conduct by The European Science  
50 Foundation.[34] Nevertheless it was important to confirm that local investigators in LMICs held similar views as  
51 espoused by the above reports. Our subsequent research on this topic has been conducted in other settings,  
52 including a wider range of stakeholders in order to overcome these limitations.  
53  
54  
55  
56  
57  
58  
59  
60

Comment [SF25]: Comment 18 revision

Comment [SF26]: Comment 18 revision

Comment [SRPF27]: Comment 45 and 48  
revision

Comment [SRPF28]: Comment 20, 30 and 45  
revision

Comment [SRPF29]: Comment 2 revision

Comment [SF30]: Comment 28 and 40 revision

Comment [SRPF31]: Comment 2 revision

## CONCLUSION

Developing research capacity to conduct investigator-initiated trials is multifaceted and likely to require a different strategy to traditional approaches that focus on individuals or capacity building for specific studies. Appreciation of the barriers and enablers at all levels must be central to development drives. While this study provides a preliminary step forward in this area, further work is needed to test these findings in other settings and to develop the thorough understanding required to successfully support these critical studies.

Comment [SF32]: Comment 17 revision

Comment [SF33]: Comment 18 revision

## FIGURE LEGENDS

*Figure 1: Number of clinical trials in Ethiopia by intervention type and sponsor, as registered on the WHO International Clinical Trials Registry Platform in the same period as data collection (30/04/2011). The observational study was registered as a clinical trial but was a cohort study with a nested cross-sectional design.*

*Figure 2: Participant experience of different medical professional experience domains. Experience domains are not mutually exclusive and one participant can have multiple experience domains.*

Comment [SRPF34]: Comment 11 revision

*Figure 3: Mechanistic model of the factors influencing clinical trial conduct in Ethiopia*

## EXCLUSIVE LICENCE STATEMENT, CONTRIBUTORS, ACKNOWLEDGMENTS, COMPETING INTERESTS, FUNDING, STUDY APPROVAL

### Exclusive licence statement

I Samuel Franzen the Corresponding Author of this article contained within the original manuscript which includes any diagrams & photographs, other illustrative material, video, film or any other material howsoever submitted by the Contributor(s) at any time and related to the Contribution ("the Contribution") have the right to grant on behalf of all authors and do grant on behalf of all authors, a licence to the BMJ Publishing Group Ltd and its licensees, to permit this Contribution (if accepted) to be published in BMJ Open and any other BMJ Group products and to exploit all subsidiary rights, as set out in the licence at: ([http://group.bmj.com/products/journals/instructions-for-authors/BMJOpen\\_licence.pdf](http://group.bmj.com/products/journals/instructions-for-authors/BMJOpen_licence.pdf))

### Contributor Statement

SF (PhD student) conceived, designed and implemented the study, analysed the data and drafted the manuscript with input and assistance from CC, BA and TL (PhD supervisors). FE, SS and JA collaborated on the interpretation of data and critically revised and reviewed the manuscript. All authors approved the final version of the manuscript.

Comment [SRPF35]: Comment 25 revision

### Acknowledgements

We would like to thank all the faculty, researchers and students who participated in the study in Ethiopia

### Competing interests

All authors declare that they have no competing interests

### Funding statement



1  
2  
3  
4  
5 This work was supported by The Global Health Network, a Bill and Melinda Gates Foundation funded project (grant  
6 reference: OPP1053843), and in part by a Nuffield Department of Medicine Doctoral Prize Studentship. The funders  
7 had no role in study sponsorship.  
8

### 9 Study approval

10 This study was approved by the University of Oxford Tropical Research Ethics Committee (OXTREC Reference 70-11)  
11  
12  
13

### 14 REFERENCES

- 15 1. Nuyens Y. No Development Without Research. Geneva: Global Forum for Health Research, 2005.
- 16 2. Davey S. The 10/90 Report on Health Research 2003-2004. Geneva: Global Forum for Health Research, 2004.
- 17 3. Garner P, Kale R, Dickson R, et al. Getting research findings into practice - Implementing research findings in  
18 developing countries. *Br Med J* 1998;**317**(7157):531-35.
- 19 4. Lang T, Siribaddana S. Clinical trials have gone global: is this a good thing? *PLoS Med* 2012;**9**(6):e1001228 doi:  
20 10.1371/journal.pmed.1001228.
- 21 5. Page J, Heller RF, Kinlay S, et al. Attitudes of developing world physicians to where medical research is performed  
22 and reported. *BMC Public Health* 2003;**3**:6.
- 23 6. Jones N, M. B, Lyytikainen M. Research capacity strengthening in Africa: Trends, gaps and opportunities. London:  
24 Overseas Development Institute, 2007.
- 25 7. Aksoy S. Solutions to neglected tropical diseases require vibrant local scientific communities. *PLoS Negl Trop Dis*  
26 2010;**4**(3):e662 doi: 10.1371/journal.pntd.0000662.
- 27 8. Dayrit MM, Poz MRD, Mercer H, et al. Towards evidence-informed policy-making in human resources for health:  
28 the state of research. Global Forum Update on Research for Health Volume 4. London: Pro-Books Publishing  
29 Ltd, 2007:160-62.
- 30 9. Devasenapathy N, Singh K, Prabhakaran D. Conduct of clinical trials in developing countries: a perspective. *Current*  
31 *Opinion in Cardiology* 2009;**24**(4):295-300 doi: Doi 10.1097/Hco.0b013e32832af21b.
- 32 10. Yusuf S, Collins R, Peto R. Why do we need some large, simple randomized trials? *Stat Med* 1984;**3**(4):409-22.
- 33 11. Godwin M, Ruhland L, Casson I, et al. Pragmatic controlled clinical trials in primary care: the struggle between  
34 external and internal validity. *BMC Med Res Methodol* 2003;**3**:28 doi: 10.1186/1471-2288-3-28.

12. Laabes EP, Desai R, Zawedde SM, et al. How much longer will Africa have to depend on western nations for support of its capacity-building efforts for biomedical research? *Trop Med Int Health* 2011;**16**(3):258-62 doi: 10.1111/j.1365-3156.2010.02709.x.
13. Costello A, Zumla A. Moving to research partnerships in developing countries. *Br Med J* 2000;**321**(7264):827-29.
14. Chandiwana S, Ornbjerg N. Review of North-South and South-South cooperation and conditions necessary to sustain research capability in developing countries. *J Health Popul Nutr* 2003;**21**(3):288-97.
15. Hoekman J, Frenken K, de Zeeuw D, et al. The geographical distribution of leadership in globalized clinical trials. *PLoS One* 2012;**7**(10):e45984 doi: 10.1371/journal.pone.0045984.
16. Lansang MA, Dennis R. Building capacity in health research in the developing world. *Bull World Health Organ* 2004;**82**(10):764-70.
17. Matsoso P, Auton M, Banoo S, et al. How does the regulatory framework affect incentives for research and development? A proposal for a regulatory framework to improve regulatory capacity and introduce incentives for research and development in areas of public health importance. Geneva: World Health Organisation, 2005.
18. Shafiq N, Pandhi P, Malhotra S. Investigator-initiated pragmatic trials in developing countries--much needed but much ignored. *Br J Clin Pharmacol* 2009;**67**(1):141-2 doi: 10.1111/j.1365-2125.2008.03291.x.
19. Tyndall A. Why do we need noncommercial, investigator-initiated clinical trials? *Nat Clin Pract Rheum* 2008;**4**(7):354-55.
20. Braun V, Clarke V. Using thematic analysis in psychology. *Qualitative Research in Psychology* 2006;**3**(2):34.
21. World Health Organisation. World report on knowledge for better health: strengthening health systems. Geneva: World Health Organisation, 2004.
22. Gaym A. Health research in Ethiopia--past, present and suggestions on the way forward. *Ethiop Med J* 2008;**46**(3):287-308.
23. Hiatt J. ADKAR: A Model for Change in Business, Government and the Community. Loveland: Learning Centre Publications, 2006.
24. Whitworth J, Sewankambo NK, Snewin VA. Improving implementation: building research capacity in maternal, neonatal, and child ~~helath~~ health in Africa. *PLoS Med* 2010;**7**(7):e1000299 doi: 10.1371/journal.pmed.1000299.

- 1  
2  
3  
4  
5 25. Mullan F, Frehywot S, Omaswa F, et al. Medical schools in sub-Saharan Africa. *Lancet* 2011;**377**(9771):1113-21  
6  
7 doi: S0140-6736(10)61961-7.  
8
- 9 26. Chen C, Greysen R, Mipando M, et al. SAMSS Site Visit Report: Faculty of Health Sciences, School of Medicine,  
10 Jimma University, Ethiopia: SAMMS, 2009.  
11  
12 <http://www.samss.org/samss.upload/wysiwyg/Full%20Site%20Visit%20Reports/Jimma%20-%20Ethiopia.pdf>  
13  
14 (accessed 19/12/12).  
15
- 16 27. Mbuagbaw L, Thabane L, Ongolo-Zogo P, et al. The challenges and opportunities of conducting a clinical trial in a  
17 low resource setting: the case of the Cameroon mobile phone SMS (CAMPS) trial, an investigator initiated  
18 trial. *Trials* 2011;**12**:145 doi: 1745-6215-12-145.  
19
- 20 28. Li LC, Grimshaw JM, Nielsen C, et al. Use of communities of practice in business and health care sectors: a  
21 systematic review. *Implement Sci* 2009;**4**:27 doi: 10.1186/1748-5908-4-27.  
22
- 23 29. Ethiopian Science and Technology Agency. National Science, Technology and Innovation (STI) Policy of Ethiopia.  
24 Addis Ababa: Available at:  
25  
26 [http://www.healthresearchweb.org/files/Ethiopia\\_National\\_S,T&I\\_Policy\\_Draft.2006.pdf](http://www.healthresearchweb.org/files/Ethiopia_National_S,T&I_Policy_Draft.2006.pdf), 2006.  
27  
28
- 29 30. Ministry of Science and Technology. The Federal Democratic Republic of Ethiopia Science, Technology and  
30 Innovation Policy. Addis Ababa: Available at: <http://www.most.gov.et/National%20STI%20Policy.htm> 2012.  
31  
32
- 33 31. Ethiopian Ministry of Health. Policies and Strategies. 2011; 2013(04/09/13).  
34  
35 <http://www.moh.gov.et/English/Information/Pages/Policies%20and%20Strategies.aspx> (accessed  
36  
37 04/09/13).  
38
- 39 32. Melis T, Ashcroft K, Macfarlane I, et al. Human capacity building needs analysis of Ethiopian new public  
40 universities (NPU): Development Assistance Group, Ethiopia, 2008.  
41
- 42 33. Crisp N. Turning the world upside down : the search for global health in the 21st century. London Royal Society of  
43 Medicine 2010.  
44
- 45 34. European Science Foundation. Forward Look - Investigator-Driven Clinical Trials. Strasbourg: European Science  
46  
47 Foundation, 2009.  
48  
49  
50  
51  
52  
53  
54  
55  
56  
57  
58  
59  
60

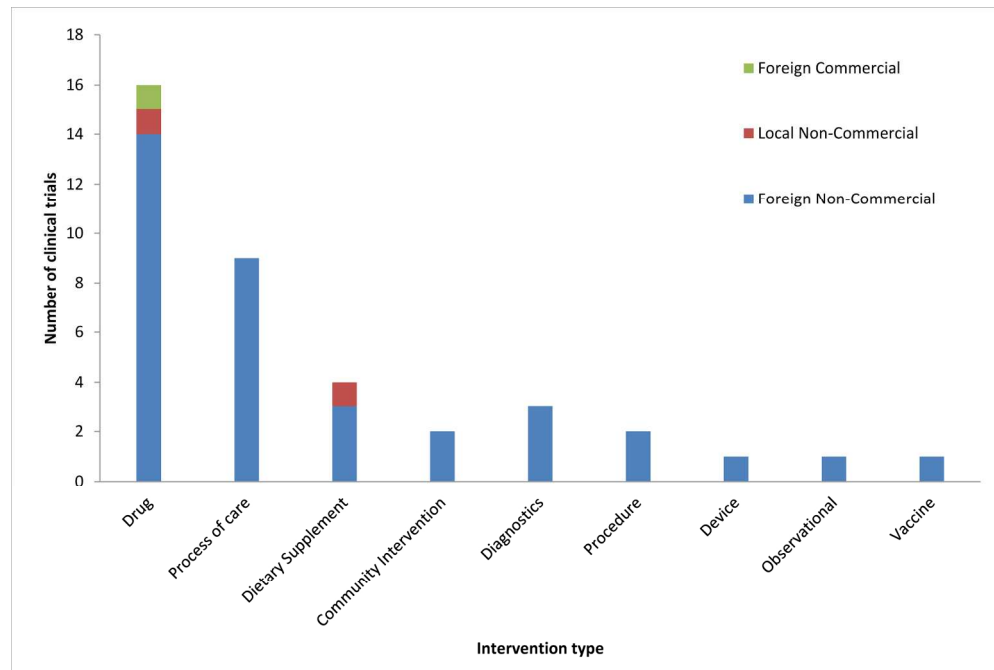

Figure 1: Number of clinical trials in Ethiopia by intervention type and sponsor, as registered on the WHO International Clinical Trials Registry Platform in the same period as data collection (30/04/2011). The observational study was registered as a clinical trial but was a cohort study with a nested cross-sectional design.

173x115mm (300 x 300 DPI)

| Medical professional experience domains | Number of participants with experience (one participant may have multiple experience domains) |
|-----------------------------------------|-----------------------------------------------------------------------------------------------|
| Clinical trial experiences              |                                                                                               |
| No clinical trial experience            | 3                                                                                             |
| Foreign initiated trials                | 15                                                                                            |
| Local investigator initiated trials     | 3                                                                                             |
| Other experiences                       |                                                                                               |
| Academia                                | 8                                                                                             |
| Clinical Practitioner                   | 9                                                                                             |
| Public health practitioner              | 3                                                                                             |
| University research leadership          | 5                                                                                             |
| Ethics board member                     | 3                                                                                             |
| Government worker                       | 1                                                                                             |

Figure 2: Participant experience of different medical professional experience domains. Experience domains are not mutually exclusive and one participant can have multiple experience domains.  
103x80mm (300 x 300 DPI)

1  
2  
3  
4  
5  
6  
7  
8  
9  
10  
11  
12  
13  
14  
15  
16  
17  
18  
19  
20  
21  
22  
23  
24  
25  
26  
27  
28  
29  
30  
31  
32  
33  
34  
35  
36  
37  
38  
39  
40  
41  
42  
43  
44  
45  
46  
47  
48  
49  
50  
51  
52  
53  
54  
55  
56  
57  
58  
59  
60

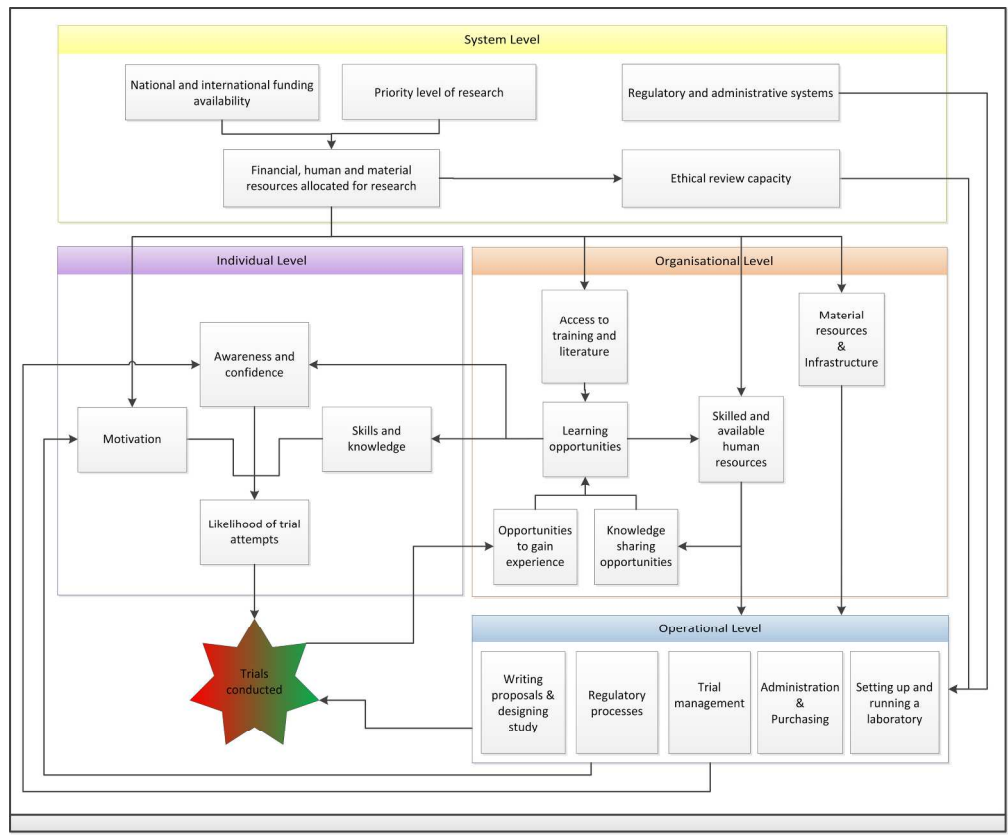

Figure 3: Mechanistic model of the factors influencing clinical trial conduct in Ethiopia 223x184mm (300 x 300 DPI)

For peer review only

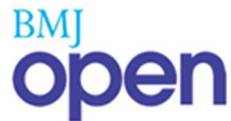

**Understanding the investigators: a qualitative study  
investigating the barriers and enablers to the  
implementation of local investigator-initiated clinical trials  
in Ethiopia**

|                                 |                                                                                                                                                                                                                                                                                                                                                                                                                                                                                                                                                                                                                                                                                                                                                                                           |
|---------------------------------|-------------------------------------------------------------------------------------------------------------------------------------------------------------------------------------------------------------------------------------------------------------------------------------------------------------------------------------------------------------------------------------------------------------------------------------------------------------------------------------------------------------------------------------------------------------------------------------------------------------------------------------------------------------------------------------------------------------------------------------------------------------------------------------------|
| Journal:                        | <i>BMJ Open</i>                                                                                                                                                                                                                                                                                                                                                                                                                                                                                                                                                                                                                                                                                                                                                                           |
| Manuscript ID:                  | bmjopen-2013-003616.R2                                                                                                                                                                                                                                                                                                                                                                                                                                                                                                                                                                                                                                                                                                                                                                    |
| Article Type:                   | Research                                                                                                                                                                                                                                                                                                                                                                                                                                                                                                                                                                                                                                                                                                                                                                                  |
| Date Submitted by the Author:   | 24-Oct-2013                                                                                                                                                                                                                                                                                                                                                                                                                                                                                                                                                                                                                                                                                                                                                                               |
| Complete List of Authors:       | Franzen, Samuel; University of Oxford, The Global Health Network, Centre for Clinical Vaccinology & Tropical Medicine<br>Chandler, Clare; London School of Hygiene & Tropical Medicine, Global Health and Development<br>Enquselassie, Fikre; Addis Ababa University, Department of Preventive Medicine, College of Health Sciences<br>Siribaddana, Sisira; Rajarata University of Sri Lanka, Department of Medicine, Faculty of Medicine & Allied Sciences<br>Atashili, Julius; University of Buea, Department of Public Health and Hygiene, Faculty of Health Sciences<br>Angus, Brian; University of Oxford, Centre for Clinical Vaccinology & Tropical Medicine<br>Lang, Trudie; University of Oxford, The Global Health Network, Centre for Clinical Vaccinology & Tropical Medicine |
| <b>Primary Subject Heading</b>: | Global health                                                                                                                                                                                                                                                                                                                                                                                                                                                                                                                                                                                                                                                                                                                                                                             |
| Secondary Subject Heading:      | Research methods, Qualitative research, Infectious diseases, Medical education and training, Health policy                                                                                                                                                                                                                                                                                                                                                                                                                                                                                                                                                                                                                                                                                |
| Keywords:                       | Clinical Trial, Capacity Strengthening, Developing Country, Research Personnel, Research Organisation and Administration, TROPICAL MEDICINE                                                                                                                                                                                                                                                                                                                                                                                                                                                                                                                                                                                                                                               |
|                                 |                                                                                                                                                                                                                                                                                                                                                                                                                                                                                                                                                                                                                                                                                                                                                                                           |

SCHOLARONE™  
Manuscripts

**Article type:**

Research Article

**Article title:**

Understanding the investigators: a qualitative study investigating the barriers and enablers to the implementation of local investigator-initiated clinical trials in Ethiopia

**Short title:**

Barriers and enablers to local investigator-initiated clinical trials in Ethiopia

**Authors:**

Samuel R P Franzen<sup>1</sup>, Clare Chandler<sup>2</sup>, Fikre Enquesslassie<sup>3</sup>, Sisira Siribaddana<sup>4</sup>, Julius Atashili<sup>5</sup>, Brian Angus<sup>1</sup>, Trudie Lang<sup>1</sup>

**Corresponding Author:**

Samuel R P Franzen, The Global Health Network, Nuffield Department of Medicine Research Building, Centre for Tropical Medicine, University of Oxford, Old Road Campus, Roosevelt Drive, Headington, Oxford, U.K., OX3 7FZ  
Email: [sam@globalhealthtrials.org](mailto:sam@globalhealthtrials.org), Telephone: +44(0)1865612957

**Author Institutions:**

<sup>1</sup>The Global Health Network, Centre for Clinical Vaccinology & Tropical Medicine, University of Oxford, Oxford, UK.

<sup>2</sup> Department of Global Health and Development, London School of Hygiene & Tropical Medicine, London W, UK.

<sup>3</sup> Department of Preventive Medicine, College of Health Sciences, Addis Ababa University, Ethiopia

<sup>4</sup> Department of Medicine, Faculty of Medicine & Allied Sciences, Rajarata University of Sri Lanka, Saliyapura, Sri Lanka

<sup>5</sup> Department of Public Health and Hygiene, Faculty of Health Sciences, University of Buea, Buea, Cameroon

**Key Words/phrases – up to 5 (MeSH Terms)**

Clinical Trial [Topic]

Capacity Strengthening

Developing Country

Research Personnel

Research/ organization & administration

**Word Count:**

4846 (excluding title page, abstract, summary, references, legends, figures and tables)



## ABSTRACT

### Objectives

Clinical trials provide “gold standard” evidence for policy, but insufficient locally-relevant trials are conducted in Low- and Middle-Income countries. Local investigator-initiated trials could generate highly relevant data for national governments, but information is lacking on how to facilitate them. We aimed to identify barriers and enablers to investigator-initiated trials in Ethiopia to inform and direct capacity strengthening initiatives.

### Design

Exploratory, qualitative study comprising of in-depth interviews (n=7) and focus group discussions (n=3).

### Setting

Fieldwork took place in Ethiopia during March 2011.

### Participants

Local health researchers with previous experiences of clinical trials or stakeholders with an interest in trials were recruited through snowball sampling (n=20).

### Outcome measures

Detailed discussion notes were analysed using thematic coding analysis and key themes were identified.

### Results

All participants perceived investigator-initiated trials as important for generating local evidence. System and organisational barriers included: Limited funding allocation, weak regulatory and administrative systems, few learning opportunities, limited human and material capacity, and poor incentives for conducting research. Operational hurdles were symptomatic of these barriers. Lack of awareness, confidence and motivation to undertake trials were important individual barriers. Training, knowledge sharing and experience exchange were key enablers to trial conduct and collaboration was unanimously regarded as important for improving capacity.

### Conclusions

Barriers to trial conduct were found at individual, operational, organisational and system levels. These findings indicate that to increase locally-led trial conduct in Ethiopia, system wide changes are needed to create a more receptive and enabling research environment. Crucially, the creation of research networks between potential trial groups could provide much needed practical collaborative support through sharing of financial and project management burdens, knowledge and resources. These findings could have important implications for capacity strengthening initiatives but further research is needed before the results can be generalised more widely.

## ARTICLE SUMMARY

### Article focus

- Investigator-initiated clinical trials could provide much needed locally relevant evidence for Low-and Middle-Income Countries, but little is known about why so few are conducted
- The objective of this paper is to report the barriers and enablers to locally-led trial conduct in Ethiopia from the perspective of local-investigators
- We summarise key factors influencing investigator-initiated trial conduct and make suggestions for directing capacity strengthening efforts

### Key messages

- Barriers to clinical trial implementation were identified at every level of the research system, demonstrating the need for an integrated approach to research capacity strengthening
- Clinical trials are rarely attempted by local researchers because of unsupportive research environments
- There is a need to build a receptive research environment that creates awareness of trials, provides investigators' with the knowledge, confidence and incentives to conduct them and removes operational barriers

### Strengths and limitations

- To our knowledge this is the first empirical research study exploring investigator-initiated trial implementation in Low-and Middle-Income Countries
- Gives a compelling voice to local investigators who are often unheard in this Northern dominated discourse
- As a formative study, the sample size was small, the sampling purposive and the findings may be context specific

## INTRODUCTION

Many development organisations argue that clinical research in low and middle income countries (LMIC) is essential for improving public health and development.[1] In LMICs clinical research capacity remains insufficient. This perpetuates the “10/90 gap”, where only 10% of global health research expenditure is allocated to diseases that primarily affect 90% of the world’s population. This leads to a lack of evidence for the world’s most burdensome diseases.[2] Evidence from Northern nations is often not relevant to LMICs, [3] and its adoption into clinical practice can be slow and treated with caution.[1 ,4] Increasing the number of clinical trials conducted in LMICs would help generate local evidence,[4] which may be more likely to rapidly influence policy and practice.[5]

Most clinical trials conducted in LMICs are run by foreign research organisations with their own agendas. Recently there have been calls from within LMICs for more ownership over priority setting,[6] greater engagement with local research communities,[7] and research conducted in line with national health strategies.[8] Pragmatic, locally-initiated disease management studies could significantly improve public health.[4] Despite being simple and cost effective, they are often ignored by international trial groups,[9] and are rarely independently undertaken in LMICs. By “pragmatic” and “simple” we are referring to studies that are designed to test effectiveness, have few endpoints and broad eligibility criteria, thereby increasing external validity.[10 ,11]Meanwhile, there is increasing expectation that LMICs should take more responsibility for their research activities.[12] Increasing the number of local investigator-initiated trials (IITs) could be an answer to these issues. Several advantages of IITs over foreign-initiated trials (FITs) have been put forward (Table 1).

**Table 1 - Advantages of investigator-initiated trials over foreign-initiated trials**

- More applicable to local populations due to building on local healthcare knowledge [13]
- More demand-led and responsive to a country’s needs because they are driven by a national agenda [9]
- More likely to influence policy [13] and sustainably link research to action [14]
- Often simple studies that address important topics such as disease management [4 ,9]
- Involve local staff at all levels and stages of trial conduct,[15] so there is more opportunity for “learning by doing” and skill development [16]

The establishment of Africa-owned research centres capable of running their own clinical trials has been identified as an international priority,[17] and there are ever increasing numbers of clinical trials being conducted in LMICs.[4] However, few of these trials are locally initiated,[18] and globally, trials are becoming harder to implement.[4] Many research bodies have increased efforts to support IITs in Europe,[18 ,19] but within LMICs capacity building mostly focuses on developing sites to run international trials. Capacity building to support independent locally-led trials is likely to require a different approach. However, little is known about the best way to develop capacity and facilitate their conduct. This formative study investigates the issues facing local trial investigators in Ethiopia, and was designed to begin addressing this knowledge gap by determining the barriers and enablers to trial conduct.

## METHODS

We conducted a qualitative study using in-depth interviews (IDIs) and focus group discussions (FGDs). Research exercises took place in Addis Ababa and Gondar, Ethiopia, in March and April 2011. Ethiopia was selected to represent a country in Sub-Saharan Africa that conducts a modest number of clinical trials while having sufficient trial experience to contribute to this study. Ethiopia had 39 trials registered at the time of fieldwork; a breakdown of these by intervention and sponsor is shown in figure 1. The majority of drug trials investigated the use of approved drugs to optimise treatment.

This study seeks to understand the perspectives and experiences of current and potential trial investigators and staff. Due to the paucity of previous work on this topic, we did not prospectively adopt a specific theoretical

1 framework. However, research questions were influenced by the fields of organisational change and development.  
2 FGDs and IDIs were semi-structured and explored the following themes: the clinical research environment in  
3 Ethiopia, barriers and enablers to trial conduct, access to appropriate skills and knowledge, current support for  
4 clinical trials and recommendations for change. Questions were tailored to participants' experience and emerging  
5 themes.  
6

7 Participants were identified first through trial registration searches and subsequently by snowball sampling from  
8 these individuals. Health researchers with previous experiences of clinical trials or stakeholders with an interest in  
9 trials were selected. Of all the participants approached, none refused to take part. Interviews and discussions were  
10 conducted in English, and explored key points until no new information emerged. In preliminary meetings,  
11 participants said they would speak more openly if discussions were not audio recorded. This was because they  
12 would be uncomfortable criticising partners or regulatory bodies while being recorded. One participant explained  
13 that this worry was a result of the legacy left by previous authoritarian regimes. Detailed notes were taken with  
14 quotes noted as near verbatim as possible, detailing identification numbers.  
15  
16

17 This study was approved by the University of Oxford Tropical Research Ethics Committee. Verbal informed consent  
18 was obtained from all participants and review of discussion contributions and written confirmatory permission was  
19 obtained for all participants who could be contacted (15/20). No quotes are included from those who could not be  
20 contacted.  
21  
22

23 Notes were analysed by thematic coding analysis using Nvivo qualitative data analysis package (QSR International Pty  
24 Ltd. Version 9, 2011) to help organise the data. Data were coded inductively according to its semantic content.[20]  
25 Using relationship and modelling functions, a mechanistic model of factors influential to clinical trial conduct was  
26 developed through piecing together complementary segments of data contributed from different participants.  
27 Coding was completed by SF with consultation and agreement from other authors (TL, CC, and BA). Findings were  
28 reviewed and commented on by all authors.  
29  
30  
31  
32

## 33 RESULTS

### 34 Study population

35 We conducted 2 FGDs and 6 interviews in Addis Ababa and 1 FGD and 1 interview in Gondar. A total of 20  
36 researchers participated; 7 were based at a research centre, 1 at an NGO, 8 at a hospital and 4 at a university.  
37 Participants had varied job roles. Those currently working on a clinical trial included: Senior investigators (n=2), Trial  
38 managers and coordinators (n=5), laboratory personnel (n=5) and research nurses (n=2). We also recruited 6  
39 medical researchers not currently working on a clinical trial, 3 of whom had previous trial experience and 3 that did  
40 not. The participants had experience in a diverse range of medical professional experience domains (figure 2).  
41  
42  
43  
44

### 45 A role for investigator-initiated trials

46 All participants reported that too few clinical trials are conducted in Ethiopia, and felt this limited the ability for  
47 guidelines to be based on local evidence. Most treatment strategies were based on international guidelines, which  
48 many participants thought could be inappropriate. Participants proposed that locally-led trials would be useful for  
49 filling this evidence gap and that the conduct of simple design studies was independently achievable. Many  
50 researchers would like to lead their own studies and had important questions, but were often unsure how to go  
51 about doing this, as described by this senior clinician:  
52  
53  
54

55 *"We don't have the evidence to change local practices but we definitely know some written guidelines don't*  
56 *work. There are a number of unanswered questions for trials but we don't know how to do them. We need*  
57 *clinical research [in disease areas] that has a different effect in Ethiopia, for example HIV and TB. These*  
58 *diseases are similar as to other places but we have had little success [controlling them] here. So why? Where*  
59 *are the mistakes? These sorts of investigations are easy, they would support awareness and fill gaps."* FGD -  
3 PPT – 1

1 Compared to foreign-led studies, local trials were perceived to be more likely to address evidence gaps, be more  
2 useful for developing treatment guidelines, and more sensitive to community issues. One junior clinician described  
3 this through his experiences:  
4

5 *“Investigator-initiated trials increase evidence, particularly locally relevant evidence. For instance the*  
6 *Leishmania strain in Gondar seems to be a bit different to the other strains because the drug treatment is*  
7 *working better in the other areas. This will prevent mistakes in clinical care”*. INT - 6 PPT - 1  
8  
9

## 10 Human and Material capacity

11 While a general lack of materials, infrastructure and laboratory facilities were thought to reduce the number and  
12 scope of trials, most participants felt that human resources were the critical factor. Respondents stated that there  
13 were too few investigators with the technical expertise to initiate a trial. There was also a shortage of skilled  
14 research staff, with one investigator stating that if one or two staff left, their trial could not continue (FGD - 3 PPT -  
15 1- senior clinician and trial investigator). This lack of expertise and research skills was blamed on minimal research  
16 focus in clinical education, few opportunities to gain experience and few local experts who could share their  
17 knowledge.  
18  
19  
20

21 *“From my undergraduate experience, I was trained to be a clinician and not a researcher; this is from a*  
22 *curriculum point of view. Few clinicians use clinical trials as they are involved in primary care and not*  
23 *research. They have no spare time to think about research”..... “We need the opportunity to have a simple*  
24 *role and experience to get more people to do more trials. As more people get involved in simple research and*  
25 *trials, more research will be done”*. INT - 6 PPT – 1, Trial clinician  
26  
27  
28

29 Individuals skilled in trials were often too busy with regular duties to be able to conduct research. Most senior trial  
30 staff were clinicians and while release from routine duties could be negotiated, they complained that healthcare  
31 tasks still had to be prioritised. Academics had allocated time for research but this was regularly cited as insufficient.  
32 The limited manpower allocation to research and few opportunities to gain experience resulted in a negative  
33 feedback loop, as explained by this trial clinician:  
34  
35

36 *“The scope of activities is narrowed by the time and economic constraints and the fact few individuals can be*  
37 *involved. Because the scope is narrowed this results in a cycle of fewer people being involved, which in turn*  
38 *results in less motivation, fewer trials and less exposure and realising the way of thinking and less*  
39 *achievement. Then less people are involved and there are fewer trials”*. INT - 6 PPT - 1  
40  
41

## 42 Regulatory and other administrative bottlenecks

43 Respondents reported that complex and strict government regulations made it very difficult to investigate novel  
44 interventions and recruit vulnerable populations. Regulatory and ethical review times also introduced delays and it  
45 was not uncommon for grants to expire before all approvals were in place. A trial Principal Investigator (PI) explains  
46 this further:  
47  
48

49 *“Regulatory authorities have no clear guidelines so it is problematic getting approvals. They are also not*  
50 *experienced enough and so are overcautious and they cannot decide on interpretations”*. FGD -1 PPT -1, Trial  
51 PI  
52

53  
54 Ethics committee members admitted that limited resources, knowledge gaps and membership shortages slowed  
55 review times, but also pointed out that poor quality applications meant re-submission was regularly required. They  
56 emphasised that clarification of regulations and developing review capacity were essential to facilitate trial  
57 implementation and that more training in research ethics was needed. One participant explained that The Ethiopian  
58 Bioethics Initiative is already working towards this. Funded by the European and Developing Countries Clinical Trial  
59 Partnership, The Ethiopian Bioethics Initiative helps research sites to form institutional review boards (IRBs) and  
60

train the committee members on basic principles of ethical clearance. Under this grant they have established and trained 11 IRBs.

University and government administration systems were unanimously regarded as overly-complicated and blamed for many operational delays. To cope with this, many investigators said they required an administrative assistant but could not afford one.

*“The university finance department is a bottleneck. You really need an admin assistant to help with this. Most doctors do not want to go through the pain of organising and administrating all this. Also if you do not report your annual budget on time you may be penalised and have your salary suspended. The clinical trial financing really increases the amount of work you must do for your budget reporting. If I got a good grant I would hire an admin or research student to manage these issues.”* INT - 3 PPT -1, Clinician

## Operational hurdles

During one in-depth interview, a process mapping exercise was used as a template for discussion; the participant draws a detailed flow diagram of the steps and tasks involved in conducting their clinical trial, noting problems, successes, and changes to be made in hindsight. Table 2 describes the experience of one PI, providing an example case of operational hurdles and the importance of advanced planning.

**Table 2 - Experience of a local PI on a foreign NGO-led non-commercial study**

Registering the clinical trial caused considerable delays because task allocation was overlooked. Ethical approval for this relatively complex study took 12 months due to a cycle of resubmission. Ordering to delivery of supplies routinely took 3-6 months. Data entry and analysis were delayed because the data management system had not been considered early enough and training could only be obtained in Europe. Some laboratory tests were outsourced to a local private laboratory because staff lacked the training and equipment, while other assays were complicated by lack of normal ranges for local populations. In hindsight the PI would have taken more care with planning and preparation and made roles and responsibilities clear from the outset.

The majority of serious operational difficulties occurred during the start-up stage of trial conduct. Once intervention delivery began, there were few major challenges. Participants attributed most operational hurdles to wider issues. The main operational hurdles and their causes are summarised in Table 3. Operational enablers included: keeping trial designs simple, only investigating approved interventions and non-vulnerable populations to prevent regulatory delays, and rapid recruitment of participants due to large patient pools that were usually prepared to give consent.

| Operational Hurdles                                             | Reported causes                                                                                                                                                                                                                                                            |
|-----------------------------------------------------------------|----------------------------------------------------------------------------------------------------------------------------------------------------------------------------------------------------------------------------------------------------------------------------|
| 1. Difficulty writing proposals and gaining funding             | <ul style="list-style-type: none"> <li>• Little local funding, competitive international funding</li> <li>• Technical ability and confidence lacking</li> <li>• Unsure of funding process; investigators don't complete application</li> <li>• Lack of training</li> </ul> |
| 2. Slow regulatory and ethical approvals                        | <ul style="list-style-type: none"> <li>• Complex and unclear guidelines</li> <li>• Limited ethical review capacity</li> <li>• Poor quality submissions</li> </ul>                                                                                                          |
| 3. Problems with trial management                               | <ul style="list-style-type: none"> <li>• Lack of experience and poor planning</li> </ul>                                                                                                                                                                                   |
| 4. Burdensome administration and difficulty purchasing supplies | <ul style="list-style-type: none"> <li>• Complex and slow systems</li> <li>• No administrative support</li> </ul>                                                                                                                                                          |
| 5. Problems with setting up and running laboratory tests        | <ul style="list-style-type: none"> <li>• Limited funds and facilities</li> <li>• Difficulty purchasing supplies</li> <li>• Lack knowledge in technologically advanced procedures</li> </ul>                                                                                |

Table 3: Participant reported operational hurdles and their causes

## Initiating an idea: Awareness, Confidence and Motivation

Participants reported that limited awareness of trial research among their colleagues was a common reason for trials not being attempted. This was because potential investigators were not exposed to the methodology or had not considered doing them, as explained by this PI:

*"People do not have the vision that clinical trials will improve patient care because they do not see it in their daily lives. Clinical trials are important but essentially people do not see them enough to think of them".* INT - 4 PPT -1, Senior Clinician

This was attributed to omissions in medical student curricula, limited access to literature, little trial research training and few trial opportunities. If individuals had considered conducting a trial, many participants said that most researchers were not confident to initiate one themselves because they lacked the knowledge and skills. Even investigators who had considerable experience on foreign-led studies said they did not feel ready to lead their own. The expectation of operational difficulties and few examples of role models successfully conducting trials created a "phobia" of trial research, with people believing them to be almost impossible. This "phobia" and lack of awareness was seen as a key barrier to trial conduct, as explained by this junior trial investigator:

*"We need to develop and support a research culture by capacity building to develop skills and resources, not big capacity building like an operating room, but small scale like small grants for beginner researchers to do research and get practice - this would take away the phobia of writing proposals and publications. When the phobia has gone there will be floods of research. We need to open our eyes and see what can be done. For instance people don't know how to write a proposal. In people's academic studies this sort of stuff is not given priority. Even small research will be an eye opener and the phobia will be gone."* FGD - 3 PPT - 2, Clinician and junior investigator

Even when potential investigators felt ready to conduct a trial, many participants said that the motivation for undertaking them was insufficient and this discouraged their colleagues from attempting them. Participants were encouraged by altruistic incentives such as community health improvement and organisational development but personal career incentives were weak. A lack of research career options discouraged students from entering into research after studies or caused them to migrate for work, as this junior academic explained:

*"We need to make sure people get jobs and an established career in research to get them to stay in their home country or to come back to their home country after training or education abroad."* INT - 2 PPT -1

Researchers also reported little recognition for research and that promotion could be achieved without doing research. Additionally, strong salary and workload disincentives were cited, as summarised by this IDI participant:

*"The problem is that this [clinical trial research] will take lots of your time and while it is possible to reduce your clinic hours, this means you would lose money. The country does not pay you even though it is for public benefit. There is no incentive, in short".* INT - 4 PPT -1, Senior clinician

## The key enablers: Training, Knowledge Sharing and Experience Exchange

Equal to their value for building technical competence, many participants saw trial training, knowledge sharing and experience exchange as key enablers for increasing awareness, confidence and motivation. Training was viewed as important for awareness and encouraging staff to consider their workplace challenges in a more enquiring light. Knowledge sharing boosted researcher's confidence that trials were achievable and experience exchange was important for raising professional standards and dispelling what one respondent termed "pseudo-confidence" (INT - 4 PPT -1 - Clinician and trial PI); meaning to continue working in a sub-optimum way because knowledge of more rigorous methods was lacking. Many participants emphasised that all these enablers would be more effective if grounded in local examples and context, such as knowledge sharing with individuals whose settings were similar to the researcher's own. Learning activities were also highly motivational because they were prized for both personal and professional development. Given the scarcity of trial opportunities in Ethiopia, some participants suggested that

national or international experience exchange programmes would be useful. One FGD participant explained her trial team's experiences:

*"What we really want is for a south-south collaboration like Kenya or Uganda to do exchange placements for our junior staff. This would show people in resource-limited settings it is possible to do trials and would motivate people much more than website or e-learning.....She [referring to research nurse] has been to Kenya and Switzerland and this has helped her to see how clinical trials are done and what is good and bad and see the possibilities." FGD - 3 PPT – 1, Senior clinician and trial investigator*

## The importance of collaboration

While some respondents had negative experiences with foreign led-studies or said they would prefer to be less dependent on foreign groups, most participants were very positive about international collaboration, assuming intellectual independence could be protected. Technical expertise and infrastructure strengthening provided through collaborations were consistently proposed as a solution to the limited human and material resources. Particularly, collaborative grant applications had been very helpful for securing funding by increasing the quality and credibility of applications. Local and international collaboration was also seen as a key way to access and promote training, knowledge sharing and experience exchange. This senior academic summarises the general opinion:

*"The priority is addressing local concerns like field-based optimisation. Weight should be given to locally initiated ideas. However, you should then ask for international assistance and collaboration. The investigator-initiated trial is all about the idea and not about the operation. You do not have to re-invent the wheel; you should make the most of global knowledge and skills. Everyone should chip in with their appropriate competence and expertise. This way the work will be faster and more efficient and local researchers will have access to technologies". INT - 1 PPT -1*

However, junior participants said they lacked the contacts and knowledge to develop partnerships and even established researchers often felt intellectually isolated from the East African and wider research community. This was believed to hamper innovation and cause repetition of ideas.

## DISCUSSION

This study highlights that Ethiopian investigators think that investigator-initiated trials would generate highly useful and applicable data, supporting the call for more local evidence generation in LMICs. The challenge is implementing and successfully conducting a locally-led study. We have identified barriers to the implementation of investigator-initiated trials in Ethiopia at all levels of the research system. Exploring through the perspective of local investigators has given a critical understanding of how these issues influence their ability to initiate trials. We have demonstrated the importance of training, knowledge sharing, experience exchange and collaboration, for breaking down barriers in somewhat unexpected ways and now consider, in light of this, how locally-led trials can be better supported.

### The research system

Health research systems represent the coordinated activities of all stakeholders to produce health research and may operate at local, national, regional or global levels. The four main functions of health research systems are: stewardship, financing, resources and producing and using research.[21] In Ethiopia, barriers and enablers to trial conduct have been identified at all levels of the national research system; system, organisational and individual. The main influential factors identified in this study have been summarised into a mechanistic model (Figure 3). The following description is intended to illustrate the interconnected nature of the barriers to trial research and how deficiencies at one level can have cascading negative effects. System level barriers impact on all levels through often dysfunctional regulatory and administrative systems, insufficient funding allocation and limited ethical review capacity. Suffering from limited resources, the organisational level provides limited learning opportunities, which negatively impacts on human resources. These deficiencies, combined with adverse regulatory and administrative systems, make operating clinical trials difficult. The combined effects of insufficient resources, limited learning



opportunities and difficult operations result in a disabling research environment at an individual level. This reduces awareness of trials, limits competence and confidence, and reduces motivation to undertake them. Few trials are attempted and this forms a negative feedback loop by reducing opportunities for experience.

A detailed review of the Ethiopian Health Research System also cites slow regulatory and ethical review, difficult administration systems, limited human resource allocation and few incentives as major impediments.[22] However it is important to emphasise that our description is not universal and individual examples of enabling practices and trial capacity exist. Furthermore, no information was available to us on the number of trial applications, rejections and turnaround times and although little local evidence-based practice was reported, this was not confirmed by the authorities and examples of local trials influencing policy are found in the literature. [23] Nevertheless these results demonstrate the importance of taking a system-wide view to research development. Operational problems are embedded in wider issues, and while certain strategies may help investigators cope with problems, their resolution is dependent on strengthening capacity at all levels of the system. Fortunately in-country expertise exists in almost all major aspects of the health research system, which should greatly facilitate strengthening efforts.[22]

### Building a receptive research environment

Although capacity to conduct trials was limited, most researchers agreed that simple design studies could be done. However, local investigators have attempted few trials. A key problem was the disabling research environment at the individual level. Clinical trials are a relatively new phenomenon and are not yet embedded in the Ethiopian research culture. Therefore their implementation can be viewed as a change within this culture. The ADKAR model for organisational change management, suggests that for a change to happen at an individual level, Awareness, Desire, Knowledge, Ability and Reinforcement must be present.[24] Trial awareness was limited and investigators did not have the vision that trials would improve patient care. Although most participants had the desire to lead a trial, they reported a general lack of knowledge and competence. For those that had the knowledge, many still felt unable to lead a trial, or were unwilling because of minimal motivational reinforcement.

This study and others,[25 ,26] suggest that increased learning opportunities and rewarding career paths are required to increase human resource capacity and retain skilled personnel. Increasing research components in taught courses, and providing training and small research grants for young researchers would increase awareness, desire and knowledge to conduct research. In Ethiopia, clinical academic staff have low salaries and are paid less than public sector physicians.[27] This, combined with limited funding, high teaching burdens, low quality facilities and frustrations with bureaucratic and operational hurdles found in this and another study,[27] all serve as strong disincentives to research. Providing protected time for research and recognising research within careers would help motivate investigators to undertake trials through positive reinforcement, but this alone may not be sufficient without adequate salaries to offset lost revenue from private practice and consultancy work.

Several participants expressed their inability to lead their own trial as a lack of confidence, or phobia, and investigators who had worked on foreign-led studies still did not feel ready to lead their own trial. Local funding and material capacity constraints were often cited as the cause, but many researchers had not applied for international funding. Expectation of insurmountable barriers and lack of successful role models certainly reduce confidence. However, it is possible that the intellectual isolation identified in this and another study,[27] and lack of a supportive research environment, could reduce initiative. We also propose that previous regimes that actively discouraged autonomy, could have left a legacy that reduced the ability of individuals to act as agents in change.

### Networking

Collaboration was key to the provision of training, knowledge sharing and experience exchange, and accessing technical expertise and infrastructure strengthening. Better networking within and between local and international research organisations could facilitate the provision of these enablers, decrease intellectual isolation and help develop a National Health Research System. [22]

1 Successful local sites are often busy, so exchange placements could be organised to allow more individuals to get  
2 involved. This could potentially increase trial staff numbers and reduce the impact of task shifting on clinic work. This  
3 may then reverse the negative feedback loop between insufficient human resources and few trials. Local research  
4 networks could support sustainable training models if a few experts become trainers of trainers and mentorship  
5 programmes linking experts to junior staff could provide inspirational support and guidance for isolated individuals.  
6 The need for administrative support in LMICs is common as many universities lack established research services.[26  
7 ,28] Cooperation between departments to form research clusters would make hiring an administrative assistant  
8 affordable and could help share the cost and burden of purchasing supplies.  
9

10 Creation of communities of practice could help to develop these relationships but proven strategies that foster their  
11 development are not clearly established.[29] Networking opportunities such as workshops would be useful, but  
12 firstly all stakeholders need to be identified and travel, time and cost can be barriers. Also, the informal nature of  
13 partnership formation in this study meant that less established researchers did not have the contacts or knowledge  
14 to find partners. One solution could be to develop a local and international online networking facility, detailing  
15 research interests, expertise, resources and current projects.  
16  
17  
18

### 19 **Prioritising research systems**

20 Capacity building attached to foreign-led studies typically focuses on training individuals in specific skills or providing  
21 one specific service or resource. While this may get a particular study done, in Ethiopia, it does not appear to provide  
22 the package necessary to allow local investigators to conduct their own trials. This study demonstrates the diversity  
23 of factors influencing IIT implementation and shows that focusing on system wide improvements must be integral to  
24 any long-term research development plan for Ethiopia. For this to happen, we suggest that research must be  
25 prioritised, not just in terms of resource allocation but also the value placed on research. However, in a country with  
26 insufficient health workers to provide routine healthcare,[27] and many other competing priorities, this may be  
27 difficult.  
28  
29  
30

31 Despite this, such a value change could already be underway. The Ethiopian Science and Technology Agency devised  
32 strong implementation strategies to support research in 2006[30] and built on them in 2012.[31] The importance of  
33 research and developing research capacities is now central to the Ministry of Health strategy and local trial data[32]  
34 has influenced policy.[33] Recommendations for fostering a research culture in the New Public Universities have  
35 been developed[34] and Jimma University in South West Ethiopia has been applauded for pioneering new  
36 innovative teaching methods, valuing research within institutional culture and integrating it in career progress.[27  
37 ,35] Meanwhile, The Ethiopian Bioethics Initiative is working hard to strengthen regulatory procedures and provides  
38 a successful example of developing ethical review capacity.  
39  
40  
41

### 42 **Strengths and Limitations**

43 As a formative study, the sample size and range of stakeholder roles was small, and the findings may be specific to  
44 the locations or dependent on contextual factors such as governance style. Although this limits the breadth of  
45 perspectives and generalisability of findings, the study sample accessed diverse experiences and used in-depth  
46 qualitative methods to uncover issues in a largely unexplored area, while giving a compelling voice to local  
47 investigators who are often unheard in this Northern dominated discourse. Inability to audio record the discussions  
48 may have had some impact on the accuracy of notes taken. However, we felt it was more important to ensure open  
49 and frank dialogue, and the detailed notes were subsequently reviewed by participants to ensure accurate  
50 representation. The recommendations in this study are congruent with those proposed by The Ethiopian Ministry of  
51 Science and Technology, [30 ,31] and also agree with much of the current international literature. This includes the  
52 key factors for an enabling research environment as identified by The Health Research System Analysis Initiative of  
53 WHO/RPC,[21] and recommendations for increasing investigator-initiated trial conduct by The European Science  
54 Foundation.[36] Nevertheless it was important to confirm that local investigators in LMICs held similar views as  
55 espoused by the above reports. Our subsequent research on this topic has been conducted in other settings,  
56 including a wider range of stakeholders in order to overcome these limitations.  
57  
58  
59  
60

## CONCLUSION

Developing research capacity to conduct investigator-initiated trials is multifaceted and likely to require a different strategy to traditional approaches that focus on individuals or capacity building for specific studies. Appreciation of the barriers and enablers at all levels must be central to development drives. While this study provides a preliminary step forward in this area, further work is needed to test these findings in other settings and to develop the thorough understanding required to successfully support these critical studies.

## FIGURE LEGENDS

*Figure 1: Number of clinical trials in Ethiopia by intervention type and sponsor, as registered on the WHO International Clinical Trials Registry Platform in the same period as data collection (30/04/2011). The observational study was registered as a clinical trial but was a cohort study with a nested cross-sectional design.*

*Figure 2: Participant experience of different medical professional experience domains. Experience domains are not mutually exclusive and one participant can have multiple experience domains.*

*Figure 3: Mechanistic model of the factors influencing clinical trial conduct in Ethiopia*

## EXCLUSIVE LICENCE STATEMENT, CONTRIBUTORS, ACKNOWLEDGMENTS, COMPETING INTERESTS, FUNDING, STUDY APPROVAL

### Exclusive licence statement

I Samuel Franzen the Corresponding Author of this article contained within the original manuscript which includes any diagrams & photographs, other illustrative material, video, film or any other material howsoever submitted by the Contributor(s) at any time and related to the Contribution ("the Contribution") have the right to grant on behalf of all authors and do grant on behalf of all authors, a licence to the BMJ Publishing Group Ltd and its licensees, to permit this Contribution (if accepted) to be published in BMJ Open and any other BMJ Group products and to exploit all subsidiary rights, as set out in the licence at: ([http://group.bmj.com/products/journals/instructions-for-authors/BMJOpen\\_licence.pdf](http://group.bmj.com/products/journals/instructions-for-authors/BMJOpen_licence.pdf))

### Contributor Statement

SF (PhD student) conceived, designed and implemented the study, analysed the data and drafted the manuscript with input and assistance from CC, BA and TL (PhD supervisors). FE, SS and JA collaborated on the interpretation of data and critically revised and reviewed the manuscript. All authors approved the final version of the manuscript.

### Acknowledgements

We would like to thank all the faculty, researchers and students who participated in the study in Ethiopia

### Competing interests

All authors declare that they have no competing interests

### Funding statement

This work was supported by The Global Health Network, a Bill and Melinda Gates Foundation funded project (grant reference: OPP1053843), and in part by a Nuffield Department of Medicine Doctoral Prize Studentship. The funders had no role in study sponsorship.

**Study approval**

This study was approved by the University of Oxford Tropical Research Ethics Committee (OXTREC Reference 70-11)

**Data sharing**

No additional data available.

For peer review only

1  
2  
3  
4  
5  
6  
7  
8  
9  
10  
11  
12  
13  
14  
15  
16  
17  
18  
19  
20  
21  
22  
23  
24  
25  
26  
27  
28  
29  
30  
31  
32  
33  
34  
35  
36  
37  
38  
39  
40  
41  
42  
43  
44  
45  
46  
47  
48  
49  
50  
51  
52  
53  
54  
55  
56  
57  
58  
59  
60

## REFERENCES

1. Nuyens Y. No Development Without Research. Geneva: Global Forum for Health Research, 2005.
2. Davey S. The 10/90 Report on Health Research 2003-2004. Geneva: Global Forum for Health Research, 2004.
3. Garner P, Kale R, Dickson R, et al. Getting research findings into practice - Implementing research findings in developing countries. *Br Med J* 1998;**317**(7157):531-35.
4. Lang T, Siribaddana S. Clinical trials have gone global: is this a good thing? *PLoS Med* 2012;**9**(6):e1001228 doi: 10.1371/journal.pmed.1001228.
5. Page J, Heller RF, Kinlay S, et al. Attitudes of developing world physicians to where medical research is performed and reported. *BMC Public Health* 2003;**3**:6.
6. Jones N, Bailey M, Lyytikainen M. Research capacity strengthening in Africa: Trends, gaps and opportunities. London: Overseas Development Institute, 2007.
7. Aksoy S. Solutions to neglected tropical diseases require vibrant local scientific communities. *PLoS Negl Trop Dis* 2010;**4**(3):e662 doi: 10.1371/journal.pntd.0000662.
8. Dayrit MM, Poz MRD, Mercer H, et al. Towards evidence-informed policy-making in human resources for health: the state of research. Global Forum Update on Research for Health Volume 4. London: Pro-Books Publishing Ltd, 2007:160-62.
9. Devasenapathy N, Singh K, Prabhakaran D. Conduct of clinical trials in developing countries: a perspective. *Current Opinion in Cardiology* 2009;**24**(4):295-300 doi: Doi 10.1097/Hco.0b013e32832af21b.
10. Yusuf S, Collins R, Peto R. Why do we need some large, simple randomized trials? *Stat Med* 1984;**3**(4):409-22.
11. Godwin M, Ruhland L, Casson I, et al. Pragmatic controlled clinical trials in primary care: the struggle between external and internal validity. *BMC Med Res Methodol* 2003;**3**:28 doi: 10.1186/1471-2288-3-28.
12. Laabes EP, Desai R, Zawedde SM, et al. How much longer will Africa have to depend on western nations for support of its capacity-building efforts for biomedical research? *Trop Med Int Health* 2011;**16**(3):258-62 doi: 10.1111/j.1365-3156.2010.02709.x.
13. Costello A, Zumla A. Moving to research partnerships in developing countries. *Br Med J* 2000;**321**(7264):827-29.
14. Chandiwana S, Ornbjerg N. Review of North-South and South-South cooperation and conditions necessary to sustain research capability in developing countries. *J Health Popul Nutr* 2003;**21**(3):288-97.
15. Hoekman J, Frenken K, de Zeeuw D, et al. The geographical distribution of leadership in globalized clinical trials. *PLoS One* 2012;**7**(10):e45984 doi: 10.1371/journal.pone.0045984.

- 1  
2  
3  
4  
5  
6  
7  
8  
9  
10  
11  
12  
13  
14  
15  
16  
17  
18  
19  
20  
21  
22  
23  
24  
25  
26  
27  
28  
29  
30  
31  
32  
33  
34  
35  
36  
37  
38  
39  
40  
41  
42  
43  
44  
45  
46  
47  
48  
49  
50  
51  
52  
53  
54  
55  
56  
57  
58  
59  
60
16. Lansang MA, Dennis R. Building capacity in health research in the developing world. *Bull World Health Organ* 2004;**82**(10):764-70.
  17. Matsoso. P, Auton. M, Banoo. S, et al. How does the regulatory framework affect incentives for research and development? A proposal for a regulatory framework to improve regulatory capacity and introduce incentives for research and development in areas of public health importance. Geneva: World Health Organisation, 2005.
  18. Shafiq N, Pandhi P, Malhotra S. Investigator-initiated pragmatic trials in developing countries--much needed but much ignored. *Br J Clin Pharmacol* 2009;**67**(1):141-2 doi: 10.1111/j.1365-2125.2008.03291.x.
  19. Tyndall A. Why do we need noncommercial, investigator-initiated clinical trials? *Nat Clin Pract Rheum* 2008;**4**(7):354-55.
  20. Braun V, Clarke V. Using thematic analysis in psychology. *Qualitative Research in Psychology* 2006;**3**(2):34.
  21. World Health Organisation. World report on knowledge for better health: strengthening health systems. Geneva: World Health Organisation, 2004.
  22. Gaym A. Health research in Ethiopia--past, present and suggestions on the way forward. *Ethiop Med J* 2008;**46**(3):287-308.
  23. Yassin MA, Datiko DG, Tulloch O, et al. Innovative community-based approaches doubled tuberculosis case notification and improve treatment outcome in Southern Ethiopia. *PLoS One* 2013;**8**(5):e63174 doi: 10.1371/journal.pone.0063174.
  24. Hiatt J. ADKAR: A Model for Change in Business, Government and the Community. Loveland: Learning Centre Publications, 2006.
  25. Whitworth J, Sewankambo NK, Snewin VA. Improving implementation: building research capacity in maternal, neonatal, and child health in Africa. *PLoS Med* 2010;**7**(7):e1000299 doi: 10.1371/journal.pmed.1000299.
  26. Mullan F, Frehywot S, Omaswa F, et al. Medical schools in sub-Saharan Africa. *Lancet* 2011;**377**(9771):1113-21 doi: S0140-6736(10)61961-7.
  27. Chen C, Greysen R, Mipando M, et al. SAMSS Site Visit Report: Faculty of Health Sciences, School of Medicine, Jimma University, Ethiopia: SAMMS, 2009.  
<http://www.samss.org/samss.upload/wysiwyg/Full%20Site%20Visit%20Reports/Jimma%20-%20Ethiopia.pdf>  
(accessed 19/12/12).

- 1  
2  
3  
4  
5  
6  
7  
8  
9  
10  
11  
12  
13  
14  
15  
16  
17  
18  
19  
20  
21  
22  
23  
24  
25  
26  
27  
28  
29  
30  
31  
32  
33  
34  
35  
36  
37  
38  
39  
40  
41  
42  
43  
44  
45  
46  
47  
48  
49  
50  
51  
52  
53  
54  
55  
56  
57  
58  
59  
60
28. Mbuagbaw L, Thabane L, Ongolo-Zogo P, et al. The challenges and opportunities of conducting a clinical trial in a low resource setting: the case of the Cameroon mobile phone SMS (CAMPS) trial, an investigator initiated trial. *Trials* 2011;**12**:145 doi: 1745-6215-12-145.
29. Li LC, Grimshaw JM, Nielsen C, et al. Use of communities of practice in business and health care sectors: a systematic review. *Implement Sci* 2009;**4**:27 doi: 10.1186/1748-5908-4-27.
30. Ethiopian Science and Technology Agency. National Science, Technology and Innovation (STI) Policy of Ethiopia. Addis Ababa: Available at: [http://www.healthresearchweb.org/files/Ethiopia\\_National\\_S,T&I\\_Policy\\_Draft.2006.pdf](http://www.healthresearchweb.org/files/Ethiopia_National_S,T&I_Policy_Draft.2006.pdf), 2006.
31. Ministry of Science and Technology. The Federal Democratic Republic of Ethiopia Science, Technology and Innovation Policy. Addis Ababa: Available at: <http://www.most.gov.et/National%20STI%20Policy.htm> 2012.
32. Datiko DG, Lindtjorn B. Health extension workers improve tuberculosis case detection and treatment success in southern Ethiopia: a community randomized trial. *PLoS One* 2009;**4**(5):e5443 doi: 10.1371/journal.pone.0005443.
33. Ethiopian Ministry of Health. Policies and Strategies. 2011; 2013(04/09/13). <http://www.moh.gov.et/English/Information/Pages/Policies%20and%20Strategies.aspx> (accessed 04/09/13).
34. Melis T, Ashcroft K, Macfarlane I, et al. Human capacity building needs analysis of Ethiopian new public universities (NPU): Development Assistance Group, Ethiopia, 2008.
35. Crisp N. Turning the world upside down : the search for global health in the 21st century. London Royal Society of Medicine 2010.
36. European Science Foundation. Forward Look - Investigator-Driven Clinical Trials. Strasbourg: European Science Foundation, 2009.

**Article type:**

Research Article

**Article title:**

Understanding the investigators: a qualitative study investigating the barriers and enablers to the implementation of local investigator-initiated clinical trials in Ethiopia

**Short title:**

Barriers and enablers to local investigator-initiated clinical trials in Ethiopia

**Authors:**

Samuel R P Franzen<sup>1</sup>, Clare Chandler<sup>2</sup>, Fikre Enquesslassie<sup>3</sup>, Sisira Siribaddana<sup>4</sup>, Julius Atashili<sup>5</sup>, Brian Angus<sup>1</sup>, Trudie Lang<sup>1</sup>

**Corresponding Author:**

Samuel R P Franzen, The Global Health Network, Nuffield Department of Medicine Research Building, Centre for Tropical Medicine, University of Oxford, Old Road Campus, Roosevelt Drive, Headington, Oxford, U.K., OX3 7FZ  
Email: [sam@globalhealthtrials.org](mailto:sam@globalhealthtrials.org), Telephone: +44(0)1865612957

**Author Institutions:**

<sup>1</sup>The Global Health Network, Centre for Clinical Vaccinology & Tropical Medicine, University of Oxford, Oxford, UK.

<sup>2</sup> Department of Global Health and Development, London School of Hygiene & Tropical Medicine, London W, UK.

<sup>3</sup> Department of Preventive Medicine, College of Health Sciences, Addis Ababa University, Ethiopia

<sup>4</sup> Department of Medicine, Faculty of Medicine & Allied Sciences, Rajarata University of Sri Lanka, Saliyapura, Sri Lanka

<sup>5</sup> Department of Public Health and Hygiene, Faculty of Health Sciences, University of Buea, Buea, Cameroon

**Key Words/phrases – up to 5 (MeSH Terms)**

Clinical Trial [Topic]

Capacity Strengthening

Developing Country

Research Personnel

Research/ organization & administration

**Word Count:**

4790 (excluding title page, abstract, summary, references, legends, figures and tables)



## ABSTRACT

### Objectives

Clinical trials provide “gold standard” evidence for policy, but insufficient locally-relevant trials are conducted in Low- and Middle-Income countries. Local investigator-initiated trials could generate highly relevant data for national governments, but information is lacking on how to facilitate them. We aimed to identify barriers and enablers to investigator-initiated trials in Ethiopia to inform and direct capacity strengthening initiatives.

### Design

Exploratory, qualitative study comprising of in-depth interviews (n=7) and focus group discussions (n=3).

### Setting

Fieldwork took place in Ethiopia during March 2011.

### Participants

Local health researchers with previous experiences of clinical trials or stakeholders with an interest in trials were recruited through snowball sampling (n=20).

### Outcome measures

Detailed discussion notes were analysed using thematic coding analysis and key themes were identified.

### Results

All participants perceived investigator-initiated trials as important for generating local evidence. System and organisational barriers included: Limited funding allocation, weak regulatory and administrative systems, few learning opportunities, limited human and material capacity, and poor incentives for conducting research. Operational hurdles were symptomatic of these barriers. Lack of awareness, confidence and motivation to undertake trials were important individual barriers. Training, knowledge sharing and experience exchange were key enablers to trial conduct and collaboration was unanimously regarded as important for improving capacity.

### Conclusions

Barriers to trial conduct were found at individual, operational, organisational and system levels. These findings indicate that to increase locally-led trial conduct in Ethiopia, system wide changes are needed to create a more receptive and enabling research environment. Crucially, the creation of research networks between potential trial groups could provide much needed practical collaborative support through sharing of financial and project management burdens, knowledge and resources. These findings could have important implications for capacity strengthening initiatives but further research is needed before the results can be generalised more widely.

## ARTICLE SUMMARY

### Article focus

- Investigator-initiated clinical trials could provide much needed locally relevant evidence for Low-and Middle-Income Countries, but little is known about why so few are conducted
- The objective of this paper is to report the barriers and enablers to locally-led trial conduct in Ethiopia from the perspective of local-investigators
- We summarise key factors influencing investigator-initiated trial conduct and make suggestions for directing capacity strengthening efforts

### Key messages

- Barriers to clinical trial implementation were identified at every level of the research system, demonstrating the need for an integrated approach to research capacity strengthening
- Clinical trials are rarely attempted by local researchers because of unsupportive research environments
- There is a need to build a receptive research environment that creates awareness of trials, provides investigators' with the knowledge, confidence and incentives to conduct them and removes operational barriers

### Strengths and limitations

- To our knowledge this is the first empirical research study exploring investigator-initiated trial implementation in Low-and Middle-Income Countries
- Gives a compelling voice to local investigators who are often unheard in this Northern dominated discourse
- As a formative study, the sample size was small, the sampling purposive and the findings may be context specific

## INTRODUCTION

Many development organisations argue that clinical research in low and middle income countries (LMIC) is essential for improving public health and development.[1] In LMICs clinical research capacity remains insufficient. This perpetuates the “10/90 gap”, where only 10% of global health research expenditure is allocated to diseases that primarily affect 90% of the world’s population. This leads to a lack of evidence for the world’s most burdensome diseases.[2] Evidence from Northern nations is often not relevant to LMICs, [3] and its adoption into clinical practice can be slow and treated with caution.[1 ,4] Increasing the number of clinical trials conducted in LMICs would help generate local evidence,[4] which may be more likely to rapidly influence policy and practice.[5]

Most clinical trials conducted in LMICs are run by foreign research organisations with their own agendas. Recently there have been calls from within LMICs for more ownership over priority setting,[6] greater engagement with local research communities,[7] and research conducted in line with national health strategies.[8] Pragmatic, locally-initiated disease management studies could significantly improve public health.[4] Despite being simple and cost effective, they are often ignored by international trial groups,[9] and are rarely independently undertaken in LMICs. By “pragmatic” and “simple” we are referring to studies that are designed to test effectiveness, have few endpoints and broad eligibility criteria, thereby increasing external validity.[10 ,11]Meanwhile, there is increasing expectation that LMICs should take more responsibility for their research activities.[12] Increasing the number of local investigator-initiated trials (IITs) could be an answer to these issues. Several advantages of IITs over foreign-initiated trials (FITs) have been put forward (Table 1).

**Table 1 - Advantages of investigator-initiated trials over foreign-initiated trials**

- More applicable to local populations due to building on local healthcare knowledge [13]
- More demand-led and responsive to a country’s needs because they are driven by a national agenda [9]
- More likely to influence policy [13] and sustainably link research to action [14]
- Often simple studies that address important topics such as disease management [4 ,9]
- Involve local staff at all levels and stages of trial conduct,[15] so there is more opportunity for “learning by doing” and skill development [16]

The establishment of Africa-owned research centres capable of running their own clinical trials has been identified as an international priority,[17] and there are ever increasing numbers of clinical trials being conducted in LMICs.[4] However, few of these trials are locally initiated,[18] and globally, trials are becoming harder to implement.[4] Many research bodies have increased efforts to support IITs in Europe,[18 ,19] but within LMICs capacity building mostly focuses on developing sites to run international trials. Capacity building to support independent locally-led trials is likely to require a different approach. However, little is known about the best way to develop capacity and facilitate their conduct. This formative study investigates the issues facing local trial investigators in Ethiopia, and was designed to begin addressing this knowledge gap by determining the barriers and enablers to trial conduct.

## METHODS

We conducted a qualitative study using in-depth interviews (IDIs) and focus group discussions (FGDs). Research exercises took place in Addis Ababa and Gondar, Ethiopia, in March and April 2011. Ethiopia was selected to represent a country in Sub-Saharan Africa that conducts a modest number of clinical trials while having sufficient trial experience to contribute to this study. Ethiopia had 39 trials registered at the time of fieldwork; a breakdown of these by intervention and sponsor is shown in figure 1. The majority of drug trials investigated the use of approved drugs to optimise treatment.

This study seeks to understand the perspectives and experiences of current and potential trial investigators and staff. Due to the paucity of previous work on this topic, we did not prospectively adopt a specific theoretical

1 framework. However, research questions were influenced by the fields of organisational change and development.  
2 FGDs and IDIs were semi-structured and explored the following themes: the clinical research environment in  
3 Ethiopia, barriers and enablers to trial conduct, access to appropriate skills and knowledge, current support for  
4 clinical trials and recommendations for change. Questions were tailored to participants' experience and emerging  
5 themes.  
6

7 Participants were identified first through trial registration searches and subsequently by snowball sampling from  
8 these individuals. Health researchers with previous experiences of clinical trials or stakeholders with an interest in  
9 trials were selected. Of all the participants approached, none refused to take part. Interviews and discussions were  
10 conducted in English, and explored key points until no new information emerged. In preliminary meetings,  
11 participants said they would speak more openly if discussions were not audio recorded. This was because they  
12 would be uncomfortable criticising partners or regulatory bodies while being recorded. One participant explained  
13 that this worry was a result of the legacy left by previous authoritarian regimes. Detailed notes were taken with  
14 quotes noted as near verbatim as possible, detailing identification numbers.  
15  
16

17 This study was approved by the University of Oxford Tropical Research Ethics Committee. Verbal informed consent  
18 was obtained from all participants and review of discussion contributions and written confirmatory permission was  
19 obtained for all participants who could be contacted (15/20). No quotes are included from those who could not be  
20 contacted.  
21  
22

23 Notes were analysed by thematic coding analysis using Nvivo qualitative data analysis package (QSR International Pty  
24 Ltd. Version 9, 2011) to help organise the data. Data were coded inductively according to its semantic content.[20]  
25 Using relationship and modelling functions, a mechanistic model of factors influential to clinical trial conduct was  
26 developed through piecing together complementary segments of data contributed from different participants.  
27 Coding was completed by SF with consultation and agreement from other authors (TL, CC, and BA). Findings were  
28 reviewed and commented on by all authors.  
29  
30  
31  
32

## 33 RESULTS

### 34 Study population

35 We conducted 2 FGDs and 6 interviews in Addis Ababa and 1 FGD and 1 interview in Gondar. A total of 20  
36 researchers participated; 7 were based at a research centre, 1 at an NGO, 8 at a hospital and 4 at a university.  
37 Participants had varied job roles. Those currently working on a clinical trial included: Senior investigators (n=2), Trial  
38 managers and coordinators (n=5), laboratory personnel (n=5) and research nurses (n=2). We also recruited 6  
39 medical researchers not currently working on a clinical trial, 3 of whom had previous trial experience and 3 that did  
40 not. The participants had experience in a diverse range of medical professional experience domains (figure 2).  
41  
42  
43  
44

### 45 A role for investigator-initiated trials

46 All participants reported that too few clinical trials are conducted in Ethiopia, and felt this limited the ability for  
47 guidelines to be based on local evidence. Most treatment strategies were based on international guidelines, which  
48 many participants thought could be inappropriate. Participants proposed that locally-led trials would be useful for  
49 filling this evidence gap and that the conduct of simple design studies was independently achievable. Many  
50 researchers would like to lead their own studies and had important questions, but were often unsure how to go  
51 about doing this, as described by this senior clinician:  
52  
53  
54

55 *"We don't have the evidence to change local practices but we definitely know some written guidelines don't*  
56 *work. There are a number of unanswered questions for trials but we don't know how to do them. We need*  
57 *clinical research [in disease areas] that has a different effect in Ethiopia, for example HIV and TB. These*  
58 *diseases are similar as to other places but we have had little success [controlling them] here. So why? Where*  
59 *are the mistakes? These sorts of investigations are easy, they would support awareness and fill gaps."* FGD -  
60 3 PPT – 1

1 Compared to foreign-led studies, local trials were perceived to be more likely to address evidence gaps, be more  
2 useful for developing treatment guidelines, and more sensitive to community issues. One junior clinician described  
3 this through his experiences:  
4

5 *“Investigator-initiated trials increase evidence, particularly locally relevant evidence. For instance the*  
6 *Leishmania strain in Gondar seems to be a bit different to the other strains because the drug treatment is*  
7 *working better in the other areas. This will prevent mistakes in clinical care”*. INT - 6 PPT - 1  
8  
9

## 10 Human and Material capacity

11 While a general lack of materials, infrastructure and laboratory facilities were thought to reduce the number and  
12 scope of trials, most participants felt that human resources were the critical factor. Respondents stated that there  
13 were too few investigators with the technical expertise to initiate a trial. There was also a shortage of skilled  
14 research staff, with one investigator stating that if one or two staff left, their trial could not continue (FGD - 3 PPT -  
15 1- senior clinician and trial investigator). This lack of expertise and research skills was blamed on minimal research  
16 focus in clinical education, few opportunities to gain experience and few local experts who could share their  
17 knowledge.  
18  
19  
20

21 *“From my undergraduate experience, I was trained to be a clinician and not a researcher; this is from a*  
22 *curriculum point of view. Few clinicians use clinical trials as they are involved in primary care and not*  
23 *research. They have no spare time to think about research”..... “We need the opportunity to have a simple*  
24 *role and experience to get more people to do more trials. As more people get involved in simple research and*  
25 *trials, more research will be done”*. INT - 6 PPT – 1, Trial clinician  
26  
27  
28

29 Individuals skilled in trials were often too busy with regular duties to be able to conduct research. Most senior trial  
30 staff were clinicians and while release from routine duties could be negotiated, they complained that healthcare  
31 tasks still had to be prioritised. Academics had allocated time for research but this was regularly cited as insufficient.  
32 The limited manpower allocation to research and few opportunities to gain experience resulted in a negative  
33 feedback loop, as explained by this trial clinician:  
34  
35

36 *“The scope of activities is narrowed by the time and economic constraints and the fact few individuals can be*  
37 *involved. Because the scope is narrowed this results in a cycle of fewer people being involved, which in turn*  
38 *results in less motivation, fewer trials and less exposure and realising the way of thinking and less*  
39 *achievement. Then less people are involved and there are fewer trials”*. INT - 6 PPT - 1  
40  
41

## 42 Regulatory and other administrative bottlenecks

43 Respondents reported that complex and strict government regulations made it very difficult to investigate novel  
44 interventions and recruit vulnerable populations. Regulatory and ethical review times also introduced delays and it  
45 was not uncommon for grants to expire before all approvals were in place. A trial Principal Investigator (PI) explains  
46 this further:  
47  
48

49 *“Regulatory authorities have no clear guidelines so it is problematic getting approvals. They are also not*  
50 *experienced enough and so are overcautious and they cannot decide on interpretations”*. FGD -1 PPT -1, Trial  
51 PI  
52

53 Ethics committee members admitted that limited resources, knowledge gaps and membership shortages slowed  
54 review times, but also pointed out that poor quality applications meant re-submission was regularly required. They  
55 emphasised that clarification of regulations and developing review capacity were essential to facilitate trial  
56 implementation and that more training in research ethics was needed. One participant explained that The Ethiopian  
57 Bioethics Initiative is already working towards this. Funded by the European and Developing Countries Clinical Trial  
58 Partnership, The Ethiopian Bioethics Initiative helps research sites to form institutional review boards (IRBs) and  
59  
60

train the committee members on basic principles of ethical clearance. Under this grant they have established and trained 11 IRBs.

University and government administration systems were unanimously regarded as overly-complicated and blamed for many operational delays. To cope with this, many investigators said they required an administrative assistant but could not afford one.

*“The university finance department is a bottleneck. You really need an admin assistant to help with this. Most doctors do not want to go through the pain of organising and administrating all this. Also if you do not report your annual budget on time you may be penalised and have your salary suspended. The clinical trial financing really increases the amount of work you must do for your budget reporting. If I got a good grant I would hire an admin or research student to manage these issues.”* INT - 3 PPT -1, Clinician

## Operational hurdles

During one in-depth interview, a process mapping exercise was used as a template for discussion; the participant draws a detailed flow diagram of the steps and tasks involved in conducting their clinical trial, noting problems, successes, and changes to be made in hindsight. Table 2 describes the experience of one PI, providing an example case of operational hurdles and the importance of advanced planning.

**Table 2 - Experience of a local PI on a foreign NGO-led non-commercial study**

Registering the clinical trial caused considerable delays because task allocation was overlooked. Ethical approval for this relatively complex study took 12 months due to a cycle of resubmission. Ordering to delivery of supplies routinely took 3-6 months. Data entry and analysis were delayed because the data management system had not been considered early enough and training could only be obtained in Europe. Some laboratory tests were outsourced to a local private laboratory because staff lacked the training and equipment, while other assays were complicated by lack of normal ranges for local populations. In hindsight the PI would have taken more care with planning and preparation and made roles and responsibilities clear from the outset.

The majority of serious operational difficulties occurred during the start-up stage of trial conduct. Once intervention delivery began, there were few major challenges. Participants attributed most operational hurdles to wider issues. The main operational hurdles and their causes are summarised in Table 3. Operational enablers included: keeping trial designs simple, only investigating approved interventions and non-vulnerable populations to prevent regulatory delays, and rapid recruitment of participants due to large patient pools that were usually prepared to give consent.

| Operational Hurdles                                             | Reported causes                                                                                                                                                                                                                                                            |
|-----------------------------------------------------------------|----------------------------------------------------------------------------------------------------------------------------------------------------------------------------------------------------------------------------------------------------------------------------|
| 1. Difficulty writing proposals and gaining funding             | <ul style="list-style-type: none"> <li>• Little local funding, competitive international funding</li> <li>• Technical ability and confidence lacking</li> <li>• Unsure of funding process; investigators don't complete application</li> <li>• Lack of training</li> </ul> |
| 2. Slow regulatory and ethical approvals                        | <ul style="list-style-type: none"> <li>• Complex and unclear guidelines</li> <li>• Limited ethical review capacity</li> <li>• Poor quality submissions</li> </ul>                                                                                                          |
| 3. Problems with trial management                               | <ul style="list-style-type: none"> <li>• Lack of experience and poor planning</li> </ul>                                                                                                                                                                                   |
| 4. Burdensome administration and difficulty purchasing supplies | <ul style="list-style-type: none"> <li>• Complex and slow systems</li> <li>• No administrative support</li> </ul>                                                                                                                                                          |
| 5. Problems with setting up and running laboratory tests        | <ul style="list-style-type: none"> <li>• Limited funds and facilities</li> <li>• Difficulty purchasing supplies</li> <li>• Lack knowledge in technologically advanced procedures</li> </ul>                                                                                |

*Table 3: Participant reported operational hurdles and their causes*

## Initiating an idea: Awareness, Confidence and Motivation

Participants reported that limited awareness of trial research among their colleagues was a common reason for trials not being attempted. This was because potential investigators were not exposed to the methodology or had not considered doing them, as explained by this PI:

*“People do not have the vision that clinical trials will improve patient care because they do not see it in their daily lives. Clinical trials are important but essentially people do not see them enough to think of them”.* INT - 4 PPT -1, Senior Clinician

This was attributed to omissions in medical student curricula, limited access to literature, little trial research training and few trial opportunities. If individuals had considered conducting a trial, many participants said that most researchers were not confident to initiate one themselves because they lacked the knowledge and skills. Even investigators who had considerable experience on foreign-led studies said they did not feel ready to lead their own. The expectation of operational difficulties and few examples of role models successfully conducting trials created a “phobia” of trial research, with people believing them to be almost impossible. This “phobia” and lack of awareness was seen as a key barrier to trial conduct, as explained by this junior trial investigator:

*“We need to develop and support a research culture by capacity building to develop skills and resources, not big capacity building like an operating room, but small scale like small grants for beginner researchers to do research and get practice - this would take away the phobia of writing proposals and publications. When the phobia has gone there will be floods of research. We need to open our eyes and see what can be done. For instance people don’t know how to write a proposal. In people’s academic studies this sort of stuff is not given priority. Even small research will be an eye opener and the phobia will be gone.”* FGD - 3 PPT - 2, Clinician and junior investigator

Even when potential investigators felt ready to conduct a trial, many participants said that the motivation for undertaking them was insufficient and this discouraged their colleagues from attempting them. Participants were encouraged by altruistic incentives such as community health improvement and organisational development but personal career incentives were weak. A lack of research career options discouraged students from entering into research after studies or caused them to migrate for work, as this junior academic explained:

*“We need to make sure people get jobs and an established career in research to get them to stay in their home country or to come back to their home country after training or education abroad.”* INT - 2 PPT -1

Researchers also reported little recognition for research and that promotion could be achieved without doing research. Additionally, strong salary and workload disincentives were cited, as summarised by this IDI participant:

*“The problem is that this [clinical trial research] will take lots of your time and while it is possible to reduce your clinic hours, this means you would lose money. The country does not pay you even though it is for public benefit. There is no incentive, in short”.* INT - 4 PPT -1, Senior clinician

## The key enablers: Training, Knowledge Sharing and Experience Exchange

Equal to their value for building technical competence, many participants saw trial training, knowledge sharing and experience exchange as key enablers for increasing awareness, confidence and motivation. Training was viewed as important for awareness and encouraging staff to consider their workplace challenges in a more enquiring light. Knowledge sharing boosted researcher’s confidence that trials were achievable and experience exchange was important for raising professional standards and dispelling what one respondent termed “pseudo-confidence” (INT - 4 PPT -1 - Clinician and trial PI); meaning to continue working in a sub-optimum way because knowledge of more rigorous methods was lacking. Many participants emphasised that all these enablers would be more effective if grounded in local examples and context, such as knowledge sharing with individuals whose settings were similar to the researcher’s own. Learning activities were also highly motivational because they were prized for both personal and professional development. Given the scarcity of trial opportunities in Ethiopia, some participants suggested that

national or international experience exchange programmes would be useful. One FGD participant explained her trial team's experiences:

*"What we really want is for a south-south collaboration like Kenya or Uganda to do exchange placements for our junior staff. This would show people in resource-limited settings it is possible to do trials and would motivate people much more than website or e-learning.....She [referring to research nurse] has been to Kenya and Switzerland and this has helped her to see how clinical trials are done and what is good and bad and see the possibilities."* FGD - 3 PPT – 1, Senior clinician and trial investigator

## The importance of collaboration

While some respondents had negative experiences with foreign led-studies or said they would prefer to be less dependent on foreign groups, most participants were very positive about international collaboration, assuming intellectual independence could be protected. Technical expertise and infrastructure strengthening provided through collaborations were consistently proposed as a solution to the limited human and material resources. Particularly, collaborative grant applications had been very helpful for securing funding by increasing the quality and credibility of applications. Local and international collaboration was also seen as a key way to access and promote training, knowledge sharing and experience exchange. This senior academic summarises the general opinion:

*"The priority is addressing local concerns like field-based optimisation. Weight should be given to locally initiated ideas. However, you should then ask for international assistance and collaboration. The investigator-initiated trial is all about the idea and not about the operation. You do not have to re-invent the wheel; you should make the most of global knowledge and skills. Everyone should chip in with their appropriate competence and expertise. This way the work will be faster and more efficient and local researchers will have access to technologies".* INT - 1 PPT -1

However, junior participants said they lacked the contacts and knowledge to develop partnerships and even established researchers often felt intellectually isolated from the East African and wider research community. This was believed to hamper innovation and cause repetition of ideas.

## DISCUSSION

This study highlights that Ethiopian investigators think that investigator-initiated trials would generate highly useful and applicable data, supporting the call for more local evidence generation in LMICs. The challenge is implementing and successfully conducting a locally-led study. We have identified barriers to the implementation of investigator-initiated trials in Ethiopia at all levels of the research system. Exploring through the perspective of local investigators has given a critical understanding of how these issues influence their ability to initiate trials. We have **demonstrated highlighted** the importance of training, knowledge sharing, experience exchange and collaboration, for breaking down barriers in somewhat unexpected ways and now consider, in light of this, how locally-led trials can be better supported.

### The research system

Health research systems represent the coordinated activities of all stakeholders to produce health research and may operate at local, national, regional or global levels. The four main functions of health research systems are: stewardship, financing, resources and producing and using research.[21] In Ethiopia, barriers and enablers to trial conduct have been identified at all levels of the national research system; system, organisational and individual. The main influential factors identified in this study have been summarised into a mechanistic model (Figure 3). The following description is intended to illustrate the interconnected nature of the barriers to trial research and how deficiencies at one level can have cascading negative effects. System level barriers impact on all levels through often dysfunctional regulatory and administrative systems, insufficient funding allocation and limited ethical review capacity. Suffering from limited resources, the organisational level provides limited learning opportunities, which negatively impacts on human resources. These deficiencies, combined with adverse regulatory and administrative



1 systems, make operating clinical trials difficult. The combined effects of insufficient resources, limited learning  
2 opportunities and difficult operations result in a disabling research environment at an individual level. This reduces  
3 awareness of trials, limits competence and confidence, and reduces motivation to undertake them. Few trials are  
4 attempted and this forms a negative feedback loop by reducing opportunities for experience.

5  
6 A detailed review of the Ethiopian Health Research System also cites slow regulatory and ethical review, difficult  
7 administration systems, limited human resource allocation and few incentives as major impediments.[22] However  
8 it is important to emphasise that our description is not universal and individual examples of enabling practices and  
9 trial capacity existare present. Furthermore, no information was available to us on the number of trial applications,  
10 rejections and turnaround times and although little local evidence-based practice was reported, this was not  
11 confirmed by the authorities and examples of local trials influencing policy are found in the literature. [23]  
12 Nevertheless these results demonstrate the importance of taking a system-wide view to research development.  
13 Operational problems are embedded in wider issues, and while certain strategies may help investigators cope with  
14 problems, their resolution is dependent on strengthening capacity at all levels of the system. Fortunately in-country  
15 expertise exists in almost all major aspects of the health research system, which should greatly facilitate  
16 strengthening efforts.[22]  
17  
18  
19

## 20 Building a receptive research environment

21 Although capacity to conduct trials was limited, most researchers agreed that simple design studies could be done.  
22 However, local investigators have attempted few trials. A key problem was the disabling research environment at  
23 the individual level. Clinical trials are a relatively new phenomenon and are not yet embedded in the Ethiopian  
24 research culture. Therefore their implementation can be viewed as a change within this culture. The ADKAR model  
25 for organisational change management, suggests that for a change to happen at an individual level, Awareness,  
26 Desire, Knowledge, Ability and Reinforcement must be present.[24] Trial awareness was limited and investigators did  
27 not have the vision that trials would improve patient care. Although most participants had the desire to lead a trial,  
28 they reported a general lack of knowledge and competence. For those that had the knowledge, many still felt unable  
29 to lead a trial, or were unwilling because of minimal motivational reinforcement.  
30  
31  
32

33 This study and others,[25 ,26] suggest that increased learning opportunities and rewarding career paths are required  
34 to increase human resource capacity and retain skilled personnel. Increasing research components in taught courses,  
35 and providing training and small research grants for young researchers would increase awareness, desire and  
36 knowledge to conduct research. In Ethiopia, clinical academic staff have low salaries and are paid less than public  
37 sector physicians.[27] This, combined with limited funding, high teaching burdens, low quality facilities and  
38 frustrations with bureaucratic and operational hurdles found in this and another study,[27] all serve as strong  
39 disincentives to research. Providing protected time for research and recognising research within careers would help  
40 motivate investigators to undertake trials through positive reinforcement, but this alone may not be sufficient  
41 without adequate salaries to offset lost revenue from private practice and consultancy work.  
42  
43  
44

45 Several participants expressed their inability to lead their own trial as a lack of confidence, or phobia, and  
46 investigators who had worked on foreign-led studies still did not feel ready to lead their own trial. Local funding and  
47 material capacity constraints were often cited as the cause, but many researchers had not applied for international  
48 funding. Expectation of insurmountable barriers and lack of successful role models certainly reduce confidence.  
49 However, it is possible that the intellectual isolation identified in this and another study,[27] and lack of a supportive  
50 research environment, could reduce initiative. We also propose that previous regimes that actively discouraged  
51 autonomy, could have left a legacy that reduced the ability of individuals to act as agents in change.  
52  
53  
54

## 55 Networking

56 Collaboration was key to the provision of training, knowledge sharing and experience exchange, and accessing  
57 technical expertise and infrastructure strengthening. Better networking within and between local and international  
58 research organisations could facilitate the provision of these enablers, decrease intellectual isolation and help  
59 develop a National Health Research System. [22]  
60

1 Successful local sites are often busy, so exchange placements could be organised to allow more individuals to get  
2 involved. This could potentially increase trial staff numbers and reduce the impact of task shifting on clinic work. This  
3 may then reverse the negative feedback loop between insufficient human resources and few trials. Local research  
4 networks could support sustainable training models if a few experts become trainers of trainers and mentorship  
5 programmes linking experts to junior staff could provide inspirational support and guidance for isolated individuals.  
6 The need for administrative support in LMICs is common as many universities lack established research services.[26  
7 ,28] Cooperation between departments to form research clusters would make hiring an administrative assistant  
8 affordable and could help share the cost and burden of purchasing supplies.

9  
10  
11 Creation of communities of practice could help to develop these relationships but proven strategies that foster their  
12 development are not clearly established.[29] Networking opportunities such as workshops would be useful, but  
13 firstly all stakeholders need to be identified and travel, time and cost can be barriers. Also, the informal nature of  
14 partnership formation in this study meant that less established researchers did not have the contacts or knowledge  
15 to find partners. One solution could be to develop a local and international online networking facility, detailing  
16 research interests, expertise, resources and current projects.

### 19 **Prioritising research systems**

20 Capacity building attached to foreign-led studies typically focuses on training individuals in specific skills or providing  
21 one specific service or resource. While this may get a particular study done, in Ethiopia, it does not appear to provide  
22 the package necessary to allow local investigators to conduct their own trials. This study demonstrates the diversity  
23 of factors influencing IIT implementation and shows that focusing on system wide improvements must be integral to  
24 any long-term research development plan for Ethiopia. For this to happen, we suggest that research must be  
25 prioritised, not just in terms of resource allocation but also the value placed on research. However, in a country with  
26 insufficient health workers to provide routine healthcare,[27] and many other competing priorities, this may be  
27 difficult.

28  
29  
30  
31 Despite this, such a value change could already be underway. The Ethiopian Science and Technology Agency devised  
32 strong implementation strategies to support research in 2006[30] and built on them in 2012.[31] The importance of  
33 research and developing research capacities is now central to the Ministry of Health [strategy and local trial data](#)[32]  
34 [has influenced policy](#).~~Policy,~~[33] ~~and~~ ~~re~~Recommendations for fostering a research culture in the New Public  
35 Universities have been developed.[34] ~~and~~ Jimma University in South West Ethiopia has been applauded for  
36 pioneering new innovative teaching methods, valuing research within institutional culture and integrating it in career  
37 progress.[27 ,35] Meanwhile, The Ethiopian Bioethics Initiative is working hard to strengthen regulatory procedures  
38 and provides a successful example of developing ethical review capacity.

### 42 **Strengths and Limitations**

43 As a formative study, the sample size and range of stakeholder roles was small, and the findings may be specific to  
44 the locations or dependent on contextual factors such as governance style. Although this limits the breadth of  
45 perspectives and generalisability of findings, the study sample accessed diverse experiences and used in-depth  
46 qualitative methods to uncover issues in a largely unexplored area, while giving a compelling voice to local  
47 investigators who are often unheard in this Northern dominated discourse. Inability to audio record the discussions  
48 may have had some impact on the accuracy of notes taken. However, we felt it was more important to ensure open  
49 and frank dialogue, and the detailed notes were subsequently reviewed by participants to ensure accurate  
50 representation. The recommendations in this study are congruent with those proposed by The Ethiopian Ministry of  
51 Science and Technology, [30 ,31] and also agree with much of the current international literature. This includes the  
52 key factors for an enabling research environment as identified by The Health Research System Analysis Initiative of  
53 WHO/RPC,[21] and recommendations for increasing investigator-initiated trial conduct by The European Science  
54 Foundation.[36] Nevertheless it was important to confirm that local investigators in LMICs held similar views as  
55 espoused by the above reports. Our subsequent research on this topic has been conducted in other settings,  
56 including a wider range of stakeholders in order to overcome these limitations.

## CONCLUSION

Developing research capacity to conduct investigator-initiated trials is multifaceted and likely to require a different strategy to traditional approaches that focus on individuals or capacity building for specific studies. Appreciation of the barriers and enablers at all levels must be central to development drives. While this study provides a preliminary step forward in this area, further work is needed to test these findings in other settings and to develop the thorough understanding required to successfully support these critical studies.

## FIGURE LEGENDS

*Figure 1: Number of clinical trials in Ethiopia by intervention type and sponsor, as registered on the WHO International Clinical Trials Registry Platform in the same period as data collection (30/04/2011). The observational study was registered as a clinical trial but was a cohort study with a nested cross-sectional design.*

*Figure 2: Participant experience of different medical professional experience domains. Experience domains are not mutually exclusive and one participant can have multiple experience domains.*

*Figure 3: Mechanistic model of the factors influencing clinical trial conduct in Ethiopia*

## EXCLUSIVE LICENCE STATEMENT, CONTRIBUTORS, ACKNOWLEDGMENTS, COMPETING INTERESTS, FUNDING, STUDY APPROVAL

### Exclusive licence statement

I Samuel Franzen the Corresponding Author of this article contained within the original manuscript which includes any diagrams & photographs, other illustrative material, video, film or any other material howsoever submitted by the Contributor(s) at any time and related to the Contribution ("the Contribution") have the right to grant on behalf of all authors and do grant on behalf of all authors, a licence to the BMJ Publishing Group Ltd and its licensees, to permit this Contribution (if accepted) to be published in BMJ Open and any other BMJ Group products and to exploit all subsidiary rights, as set out in the licence at: ([http://group.bmj.com/products/journals/instructions-for-authors/BMJOpen\\_licence.pdf](http://group.bmj.com/products/journals/instructions-for-authors/BMJOpen_licence.pdf))

### Contributor Statement

SF (PhD student) conceived, designed and implemented the study, analysed the data and drafted the manuscript with input and assistance from CC, BA and TL (PhD supervisors). FE, SS and JA collaborated on the interpretation of data and critically revised and reviewed the manuscript. All authors approved the final version of the manuscript.

### Acknowledgements

We would like to thank all the faculty, researchers and students who participated in the study in Ethiopia

### Competing interests

All authors declare that they have no competing interests

### Funding statement

This work was supported by The Global Health Network, a Bill and Melinda Gates Foundation funded project (grant reference: OPP1053843), and in part by a Nuffield Department of Medicine Doctoral Prize Studentship. The funders had no role in study sponsorship.

## Study approval

This study was approved by the University of Oxford Tropical Research Ethics Committee (OXTREC Reference 70-11)

## REFERENCES

1. Nuyens Y. No Development Without Research. Geneva: Global Forum for Health Research, 2005.
2. Davey S. The 10/90 Report on Health Research 2003-2004. Geneva: Global Forum for Health Research, 2004.
3. Garner P, Kale R, Dickson R, et al. Getting research findings into practice - Implementing research findings in developing countries. *Br Med J* 1998;**317**(7157):531-35.
4. Lang T, Siribaddana S. Clinical trials have gone global: is this a good thing? *PLoS Med* 2012;**9**(6):e1001228 doi: 10.1371/journal.pmed.1001228.
5. Page J, Heller RF, Kinlay S, et al. Attitudes of developing world physicians to where medical research is performed and reported. *BMC Public Health* 2003;**3**:6.
6. Jones N, Bailey M, Lyytikainen M. Research capacity strengthening in Africa: Trends, gaps and opportunities. London: Overseas Development Institute, 2007.
7. Aksoy S. Solutions to neglected tropical diseases require vibrant local scientific communities. *PLoS Negl Trop Dis* 2010;**4**(3):e662 doi: 10.1371/journal.pntd.0000662.
8. Dayrit MM, Poz MRD, Mercer H, et al. Towards evidence-informed policy-making in human resources for health: the state of research. Global Forum Update on Research for Health Volume 4. London: Pro-Books Publishing Ltd, 2007:160-62.
9. Devasenapathy N, Singh K, Prabhakaran D. Conduct of clinical trials in developing countries: a perspective. *Current Opinion in Cardiology* 2009;**24**(4):295-300 doi: Doi 10.1097/Hco.0b013e32832af21b.
10. Yusuf S, Collins R, Peto R. Why do we need some large, simple randomized trials? *Stat Med* 1984;**3**(4):409-22.
11. Godwin M, Ruhland L, Casson I, et al. Pragmatic controlled clinical trials in primary care: the struggle between external and internal validity. *BMC Med Res Methodol* 2003;**3**:28 doi: 10.1186/1471-2288-3-28.
12. Laabes EP, Desai R, Zawedde SM, et al. How much longer will Africa have to depend on western nations for support of its capacity-building efforts for biomedical research? *Trop Med Int Health* 2011;**16**(3):258-62 doi: 10.1111/j.1365-3156.2010.02709.x.
13. Costello A, Zumla A. Moving to research partnerships in developing countries. *Br Med J* 2000;**321**(7264):827-29.

- 1  
2  
3  
4  
5  
6  
7  
8  
9  
10  
11  
12  
13  
14  
15  
16  
17  
18  
19  
20  
21  
22  
23  
24  
25  
26  
27  
28  
29  
30  
31  
32  
33  
34  
35  
36  
37  
38  
39  
40  
41  
42  
43  
44  
45  
46  
47  
48  
49  
50  
51  
52  
53  
54  
55  
56  
57  
58  
59  
60
14. Chandiwana S, Ornbjerg N. Review of North-South and South-South cooperation and conditions necessary to sustain research capability in developing countries. *J Health Popul Nutr* 2003;**21**(3):288-97.
  15. Hoekman J, Frenken K, de Zeeuw D, et al. The geographical distribution of leadership in globalized clinical trials. *PLoS One* 2012;**7**(10):e45984 doi: 10.1371/journal.pone.0045984.
  16. Lansang MA, Dennis R. Building capacity in health research in the developing world. *Bull World Health Organ* 2004;**82**(10):764-70.
  17. Matsoso. P, Auton. M, Banoo. S, et al. How does the regulatory framework affect incentives for research and development? A proposal for a regulatory framework to improve regulatory capacity and introduce incentives for research and development in areas of public health importance. Geneva: World Health Organisation, 2005.
  18. Shafiq N, Pandhi P, Malhotra S. Investigator-initiated pragmatic trials in developing countries--much needed but much ignored. *Br J Clin Pharmacol* 2009;**67**(1):141-2 doi: 10.1111/j.1365-2125.2008.03291.x.
  19. Tyndall A. Why do we need noncommercial, investigator-initiated clinical trials? *Nat Clin Pract Rheum* 2008;**4**(7):354-55.
  20. Braun V, Clarke V. Using thematic analysis in psychology. *Qualitative Research in Psychology* 2006;**3**(2):34.
  21. World Health Organisation. World report on knowledge for better health: strengthening health systems. Geneva: World Health Organisation, 2004.
  22. Gaym A. Health research in Ethiopia--past, present and suggestions on the way forward. *Ethiop Med J* 2008;**46**(3):287-308.
  23. Yassin MA, Datiko DG, Tulloch O, et al. Innovative community-based approaches doubled tuberculosis case notification and improve treatment outcome in Southern Ethiopia. *PLoS One* 2013;**8**(5):e63174 doi: 10.1371/journal.pone.0063174.
  24. Hiatt J. ADKAR: A Model for Change in Business, Government and the Community. Loveland: Learning Centre Publications, 2006.
  25. Whitworth J, Sewankambo NK, Snewin VA. Improving implementation: building research capacity in maternal, neonatal, and child health in Africa. *PLoS Med* 2010;**7**(7):e1000299 doi: 10.1371/journal.pmed.1000299.
  26. Mullan F, Frehywot S, Omaswa F, et al. Medical schools in sub-Saharan Africa. *Lancet* 2011;**377**(9771):1113-21 doi: S0140-6736(10)61961-7.

- 1  
2  
3  
4  
5  
6  
7  
8  
9  
10  
11  
12  
13  
14  
15  
16  
17  
18  
19  
20  
21  
22  
23  
24  
25  
26  
27  
28  
29  
30  
31  
32  
33  
34  
35  
36  
37  
38  
39  
40  
41  
42  
43  
44  
45  
46  
47  
48  
49  
50  
51  
52  
53  
54  
55  
56  
57  
58  
59  
60
27. Chen C, Greysen R, Mipando M, et al. SAMSS Site Visit Report: Faculty of Health Sciences, School of Medicine, Jimma University, Ethiopia: SAMMS, 2009. <http://www.samss.org/samss.upload/wysiwyg/Full%20Site%20Visit%20Reports/Jimma%20-%20Ethiopia.pdf> (accessed 19/12/12).
28. Mbuagbaw L, Thabane L, Ongolo-Zogo P, et al. The challenges and opportunities of conducting a clinical trial in a low resource setting: the case of the Cameroon mobile phone SMS (CAMPS) trial, an investigator initiated trial. *Trials* 2011;**12**:145 doi: 1745-6215-12-145.
29. Li LC, Grimshaw JM, Nielsen C, et al. Use of communities of practice in business and health care sectors: a systematic review. *Implement Sci* 2009;**4**:27 doi: 10.1186/1748-5908-4-27.
30. Ethiopian Science and Technology Agency. National Science, Technology and Innovation (STI) Policy of Ethiopia. Addis Ababa: Available at: [http://www.healthresearchweb.org/files/Ethiopia\\_National\\_S,T&I\\_Policy\\_Draft.2006.pdf](http://www.healthresearchweb.org/files/Ethiopia_National_S,T&I_Policy_Draft.2006.pdf), 2006.
31. Ministry of Science and Technology. The Federal Democratic Republic of Ethiopia Science, Technology and Innovation Policy. Addis Ababa: Available at: <http://www.most.gov.et/National%20STI%20Policy.htm> 2012.
32. Datiko DG, Lindtjorn B. Health extension workers improve tuberculosis case detection and treatment success in southern Ethiopia: a community randomized trial. *PLoS One* 2009;**4**(5):e5443 doi: 10.1371/journal.pone.0005443.
33. Ethiopian Ministry of Health. Policies and Strategies. 2011; 2013(04/09/13). <http://www.moh.gov.et/English/Information/Pages/Policies%20and%20Strategies.aspx> (accessed 04/09/13).
34. Melis T, Ashcroft K, Macfarlane I, et al. Human capacity building needs analysis of Ethiopian new public universities (NPU): Development Assistance Group, Ethiopia, 2008.
35. Crisp N. Turning the world upside down : the search for global health in the 21st century. London Royal Society of Medicine 2010.
36. European Science Foundation. Forward Look - Investigator-Driven Clinical Trials. Strasbourg: European Science Foundation, 2009.

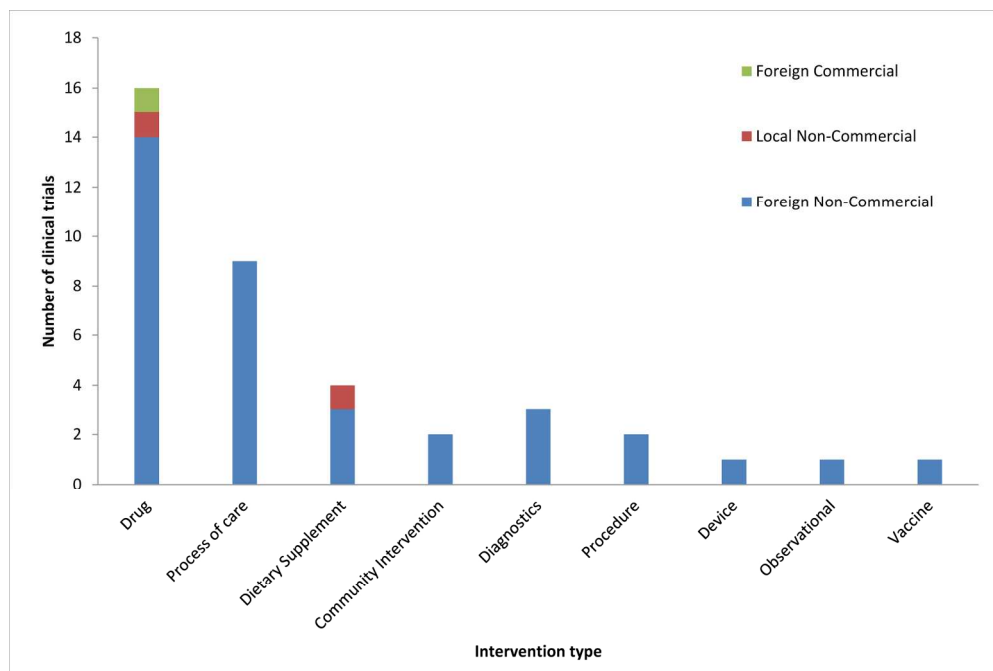

Figure 1: Number of clinical trials in Ethiopia by intervention type and sponsor, as registered on the WHO International Clinical Trials Registry Platform in the same period as data collection (30/04/2011). The observational study was registered as a clinical trial but was a cohort study with a nested cross-sectional design.

173x115mm (300 x 300 DPI)

ew only

| Medical professional experience domains | Number of participants with experience (one participant may have multiple experience domains) |
|-----------------------------------------|-----------------------------------------------------------------------------------------------|
| Clinical trial experiences              |                                                                                               |
| No clinical trial experience            | 3                                                                                             |
| Foreign initiated trials                | 15                                                                                            |
| Local investigator initiated trials     | 3                                                                                             |
| Other experiences                       |                                                                                               |
| Academia                                | 8                                                                                             |
| Clinical Practitioner                   | 9                                                                                             |
| Public health practitioner              | 3                                                                                             |
| University research leadership          | 5                                                                                             |
| Ethics board member                     | 3                                                                                             |
| Government worker                       | 1                                                                                             |

Figure 2: Participant experience of different medical professional experience domains. Experience domains are not mutually exclusive and one participant can have multiple experience domains.

103x80mm (300 x 300 DPI)



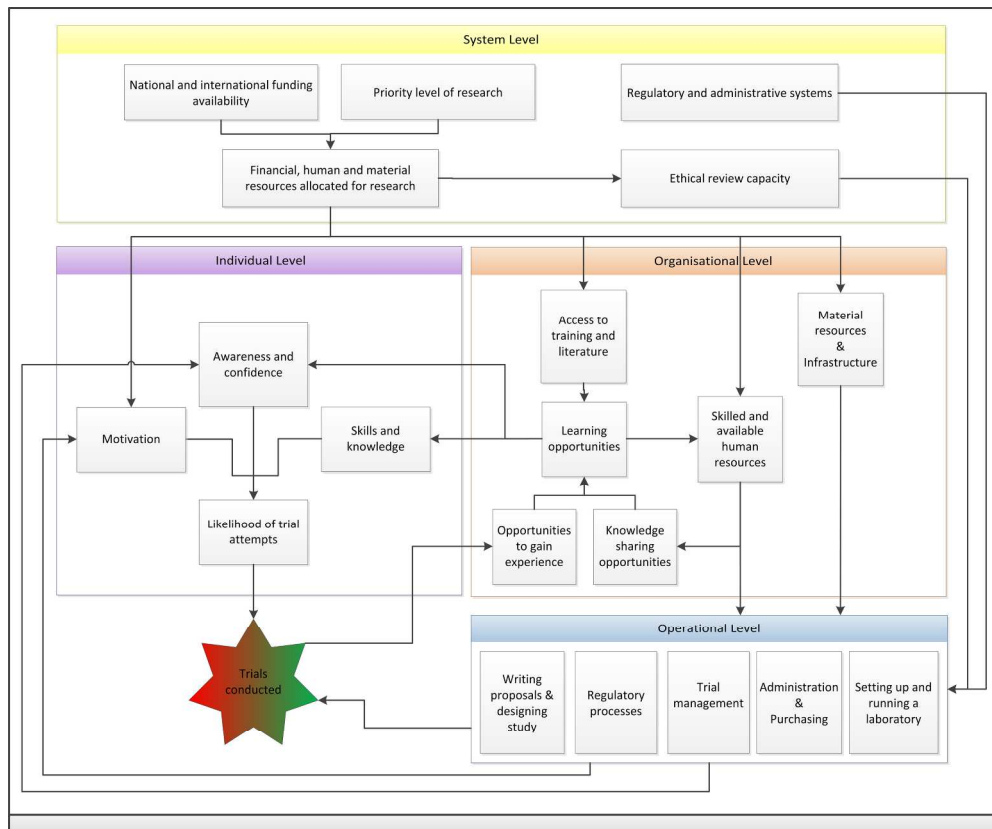

Figure 3: Mechanistic model of the factors influencing clinical trial conduct in Ethiopia 223x184mm (300 x 300 DPI)
